# Supplementary material
Source: publisher figshare collection journal article supplement (https://tandf.figshare.com/articles/dataset/_/12326126)
Supplement: Supplementary file 2 [file 1]

## Appendix 6

This appendix provides a summary about the study characteristics and the results from the included studies. To summarize:

- Table A6.1 summarizes the study characteristics:
  - Type computer model.
  - Type tissue.
  - Type boundary conditions (BC) at the outer surface of the model (BOS).
  - Type experiments and parameters that were validated.
- Table A6.2 provides:
  - Names of the included media in the model (electrodes, organs, etc.)
  - Values of the electrical and thermal properties of the media.
  - Threshold parameters of the media ( $E_{IRE(th)}$ ,  $T_{th}$ ,  $\Omega_{th}$ ,  $CEM43^{\circ}C_{(th)}$ ).
  - ❖ Please note that the data in Table A6.2 were arranged according to the names of the media.
- Table A6.3 summarizes:
  - The applied electrode characteristics.
  - The simulated pulse parameters.
  - The type boundary conditions at the boundaries between electrodes and media.
- Table A6.4 summarizes the data:
  - About the electric-field and temperature distributions.
  - About the temperature range.
  - Applied for meta-analysis.
  - About the parameters that were validated and the used pulse parameters.

**Table A6.1**

Table A6.1 Data about the used software package, modeling dimensions, tissue properties and BC of BOS used in the included studies. This table also shows whether the included studies performed experiments, the type of experiments, and the parameters that were validated. This table was arranged according to the reference number. The brackets “{ }” are defined as a set of elements. The following abbreviations are used: NR (Not reported), NA (Not applicable), NC (Not clear), NTA (No thermal analysis), and ND (Not defined).

| Computer model                                    |                             | Tissue properties  |                                                 |                                    |                                 |                            | Boundary conditions (BC) applied to boundaries at outer surface (BOS) |                        | Experiments                               |                                          |                    |      |
|---------------------------------------------------|-----------------------------|--------------------|-------------------------------------------------|------------------------------------|---------------------------------|----------------------------|-----------------------------------------------------------------------|------------------------|-------------------------------------------|------------------------------------------|--------------------|------|
| Used software package                             | Dimension of model geometry | Selected tissue    | Composition                                     | Electrical conductivity dependence | Thermal conductivity dependence | Effect of blood perfusion? | Type electrical BC at BOS                                             | Type thermal BC at BOS | Performed experiment? (Experimental type) | Models/ parameters attempted to validate | Additional details | Ref. |
| FEMLAB V2.2 (Finite element method)               | 2D                          | Liver              | {Homogeneous, Isotropic, Non-Linear}            | $\sigma(T)$                        | $k(T)$                          | Yes                        | Neumann                                                               | Neumann                | No                                        | NA                                       | NA                 | [3]  |
| FEMLAB (Finite element method)                    | 2D                          | Liver              | {Homogeneous, Isotropic, Linear}                | $\sigma$                           | $k$                             | Yes                        | Neumann                                                               | Neumann                | Yes (In vivo, rat)                        | $\{\sigma, E_{IRE(th)}\}$                | NA                 | [24] |
| NR                                                | 1D                          | Skin               | {Homogeneous, Isotropic, Linear}                | $\sigma$                           | $k$                             | No                         | NA                                                                    | NA                     | Yes (In vivo, mouse)                      | NA                                       | NA                 | [25] |
| FEMLAB (Finite element method)                    | {2D, 3D}                    | ND                 | {Homogeneous, Heterogeneous, Isotropic, Linear} | $\sigma$                           | $k$                             | NR                         | Neumann                                                               | Neumann                | No                                        | NA                                       | NA                 | [26] |
| FEMLAB (Finite element method)                    | 2D                          | ND                 | {Homogeneous, Isotropic, Linear}                | $\sigma$                           | $k$                             | No                         | Neumann                                                               | Neumann                | No                                        | NA                                       | NA                 | [27] |
| COMSOL Multiphysics V3.4 (Finite element method)  | 2D                          | {Breast, Prostate} | {Homogeneous, Heterogeneous, Isotropic, Linear} | $\sigma$                           | $k$                             | Yes                        | Neumann                                                               | Dirichlet (37 °C)      | No                                        | NA                                       | NA                 | [28] |
| NR                                                | 3D                          | Breast             | {Heterogeneous, Isotropic, Linear}              | $\sigma$                           | $k$                             | Yes                        | Neumann                                                               | Neumann                | Yes (In vitro)                            | $E_{IRE(th)}$                            | NA                 | [29] |
| Analytic                                          | 1D                          | In vitro           | {Homogeneous, Isotropic, Linear}                | $\sigma$                           | $k$                             | No                         | NA                                                                    | NA                     | Yes (In vitro)                            | NA                                       | NA                 | [30] |
| COMSOL Multiphysics V3.5A (Finite element method) | 3D                          | Brain              | {Homogeneous, Isotropic, Linear, Non-linear}    | $\sigma(E, T)$                     | $k$                             | Yes                        | Neumann                                                               | Neumann                | Yes (In vivo, dog)                        | $E_{IRE(th)}$                            | NA                 | [31] |
| COMSOL Multiphysics V3.4                          | 2D                          | Prostate           | {Homogeneous, Isotropic, Linear}                | $\sigma$                           | NTA                             | NTA                        | Neumann                                                               | NTA                    | No                                        | NA                                       | NA                 | [32] |

| Computer model                                    |                             | Tissue properties |                                              |                                    |                                 |                            | Boundary conditions (BC) applied to boundaries at outer surface (BOS) |                                                                                                                    | Experiments                               |                                         |                    |      |
|---------------------------------------------------|-----------------------------|-------------------|----------------------------------------------|------------------------------------|---------------------------------|----------------------------|-----------------------------------------------------------------------|--------------------------------------------------------------------------------------------------------------------|-------------------------------------------|-----------------------------------------|--------------------|------|
| Used software package                             | Dimension of model geometry | Selected tissue   | Composition                                  | Electrical conductivity dependence | Thermal conductivity dependence | Effect of blood perfusion? | Type electrical BC at BOS                                             | Type thermal BC at BOS                                                                                             | Performed experiment? (Experimental type) | Models/parameters attempted to validate | Additional details | Ref. |
| (Finite element method)                           |                             |                   |                                              |                                    |                                 |                            |                                                                       |                                                                                                                    |                                           |                                         |                    |      |
| NR (Finite element method)                        | 2D                          | Artery            | {Homogeneous, Isotropic, Linear}             | $\sigma$                           | k                               | Yes                        | Neumann                                                               | Dirichlet (37 °C)                                                                                                  | Yes (In vivo, rabbit)                     | NA                                      | NA                 | [33] |
| COMSOL Multiphysics V3.5A (Finite element method) | 2D                          | Artery            | {Homogeneous, Isotropic, Linear}             | $\sigma$                           | k                               | Yes                        | Neumann                                                               | Dirichlet                                                                                                          | No                                        | NA                                      | NA                 | [34] |
| COMSOL Multiphysics (Finite element method)       | 3D                          | Breast            | {Heterogeneous, Anisotropic, Linear}         | $\sigma$                           | NTA                             | NTA                        | NR                                                                    | NTA                                                                                                                | Yes (In vivo, mouse)                      | NA                                      | NA                 | [35] |
| COMSOL Multiphysics V3.5A (Finite element method) | 2D                          | Artery            | {Homogeneous, Isotropic, Linear}             | $\sigma$                           | k                               | No                         | Neumann                                                               | Dirichlet (37 °C)                                                                                                  | Yes (In vivo, rat)                        | $E_{IRE(th)}$                           | NA                 | [36] |
| COMSOL Multiphysics V3.5A (Finite element method) | 2D                          | Liver             | {Homogeneous, Isotropic, Linear, Non-linear} | $\sigma(E, T)$                     | k                               | Yes                        | Neumann                                                               | Robin ( $h = 10 \text{ W} \cdot \text{m}^{-2} \cdot ^\circ\text{C}^{-1}$ , $T_{env} = 21 \text{ }^\circ\text{C}$ ) | Yes (Ex vivo, pig)                        | $E_{IRE(th)}$                           | NA                 | [37] |
| COMSOL Multiphysics (Finite element method)       | 2D                          | Liver             | {Homogeneous, Isotropic, Linear}             | $\sigma$                           | NTA                             | NTA                        | Neumann                                                               | NTA                                                                                                                | Yes (In vivo, rat)                        | $E_{IRE(th)}$                           | NA                 | [38] |
| COMSOL Multiphysics V3.4 (Finite element method)  | 2D                          | Liver             | {Heterogeneous, Isotropic, Linear}           | $\sigma$                           | k                               | Yes                        | Neumann                                                               | Neumann                                                                                                            | No                                        | NA                                      | NA                 | [39] |
| COMSOL Multiphysics V3.5A (Finite element method) | 3D                          | Brain             | {Homogeneous, Isotropic, Linear, Non-linear} | $\{\sigma(E, T), \sigma(T)\}$      | k                               | Yes                        | Neumann                                                               | Neumann                                                                                                            | Yes (In vivo, dog)                        | Pennes bioheat equation                 | NA                 | [40] |

| Computer model                                    |                             | Tissue properties   |                                                     |                                                  |                                 |                            | Boundary conditions (BC) applied to boundaries at outer surface (BOS) |                                                                                                                                                                                                                                                                                                      | Experiments                               |                                         |                                         |      |
|---------------------------------------------------|-----------------------------|---------------------|-----------------------------------------------------|--------------------------------------------------|---------------------------------|----------------------------|-----------------------------------------------------------------------|------------------------------------------------------------------------------------------------------------------------------------------------------------------------------------------------------------------------------------------------------------------------------------------------------|-------------------------------------------|-----------------------------------------|-----------------------------------------|------|
| Used software package                             | Dimension of model geometry | Selected tissue     | Composition                                         | Electrical conductivity dependence               | Thermal conductivity dependence | Effect of blood perfusion? | Type electrical BC at BOS                                             | Type thermal BC at BOS                                                                                                                                                                                                                                                                               | Performed experiment? (Experimental type) | Models/parameters attempted to validate | Additional details                      | Ref. |
| COMSOL Multiphysics V3.5A (Finite element method) | 2D                          | Artery              | {Homogeneous, Isotropic, Non-linear}                | $\sigma$                                         | k                               | Yes                        | Neumann                                                               | Dirichlet (37 °C)                                                                                                                                                                                                                                                                                    | Yes (In vivo, rat)                        | $E_{IRE(th)}$                           | NA                                      | [41] |
| COMSOL Multiphysics V3.5A (Finite element method) | 3D                          | Subcutaneous tissue | {Heterogeneous, Isotropic, Non-linear}              | $\sigma(E)$                                      | k                               | Yes                        | Neumann                                                               | NR                                                                                                                                                                                                                                                                                                   | No                                        | NA                                      | NA                                      | [42] |
| COMSOL Multiphysics V4.2A (Finite element method) | 3D                          | In vitro            | {Homogeneous, Isotropic, Non-linear}                | $\sigma(T)$                                      | k                               | No                         | Neumann                                                               | {Neumann, Robin} ( $h = 25 \text{ W}\cdot\text{m}^{-2}\cdot\text{°C}^{-1}$ , $T_{env} = 22 \text{ °C}$ )                                                                                                                                                                                             | Yes (In vitro)                            | {Heat transfer equation, $\sigma(T)$ }  | Heat equation excluding $Q_m$ and $w_b$ | [43] |
| COMSOL Multiphysics V3.5A (Finite element method) | 3D                          | Eye                 | {Heterogeneous, Isotropic, Linear}                  | $\sigma$                                         | k                               | Yes                        | Neumann                                                               | Robin (From sclera and retina to the body core: $h = 65 \text{ W}\cdot\text{m}^{-2}\cdot\text{°C}^{-1}$ , From the cornea to the surroundings: $h = 20 \text{ W}\cdot\text{m}^{-2}\cdot\text{°C}^{-1}$ , $q_e = 40 \text{ W}\cdot\text{m}^{-2}$ , $T_{env} = 25 \text{ °C}$ , $\epsilon_s = 0.975$ ) | No                                        | NA                                      | NA                                      | [44] |
| COMSOL Multiphysics V3.5A (Finite element method) | 3D                          | Kidney              | {Homogeneous, Isotropic, Linear, Non-linear}        | $\{\sigma, \sigma(T), \sigma(E), \sigma(E, T)\}$ | k                               | Yes                        | Neumann                                                               | Robin ( $h = 94 \text{ W}\cdot\text{m}^{-2}\cdot\text{°C}^{-1}$ , $T_{env} = 37 \text{ °C}$ )                                                                                                                                                                                                        | Yes (Ex vivo, pig)                        | $\sigma(E)$                             | NA                                      | [45] |
| COMSOL Multiphysics V4.1 (Finite element method)  | 3D                          | Liver               | {Homogeneous, Heterogeneous, Isotropic, Non-linear} | $\sigma(E(t), t)$                                | NTA                             | NTA                        | NR                                                                    | NTA                                                                                                                                                                                                                                                                                                  | No                                        | NA                                      | NA                                      | [46] |
| Marc/Mentat (Finite element method)               | 3D                          | In vitro            | {Homogeneous, Isotropic, Linear}                    | $\sigma$                                         | NTA                             | NTA                        | Dirichlet ( $\{V_F, 0\}$ )                                            | NTA                                                                                                                                                                                                                                                                                                  | Yes (In vitro)                            | $E_{IRE(th)}$                           | NA                                      | [47] |
| COMSOL Multiphysics V3.5                          | 3D                          | Liver               | {Homogeneous, Isotropic, Linear}                    | $\sigma$                                         | k                               | Yes                        | Neumann                                                               | NR                                                                                                                                                                                                                                                                                                   | Yes (In vivo, rat)                        | NA                                      | NA                                      | [48] |

| Computer model                                    |                             | Tissue properties |                                                                   |                                    |                                 |                            | Boundary conditions (BC) applied to boundaries at outer surface (BOS) |                                      | Experiments                               |                                                |                    |      |
|---------------------------------------------------|-----------------------------|-------------------|-------------------------------------------------------------------|------------------------------------|---------------------------------|----------------------------|-----------------------------------------------------------------------|--------------------------------------|-------------------------------------------|------------------------------------------------|--------------------|------|
| Used software package                             | Dimension of model geometry | Selected tissue   | Composition                                                       | Electrical conductivity dependence | Thermal conductivity dependence | Effect of blood perfusion? | Type electrical BC at BOS                                             | Type thermal BC at BOS               | Performed experiment? (Experimental type) | Models/parameters attempted to validate        | Additional details | Ref. |
| (Finite element method)                           |                             |                   |                                                                   |                                    |                                 |                            |                                                                       |                                      |                                           |                                                |                    |      |
| COMSOL Multiphysics V3.5A (Finite element method) | 3D                          | Prostate          | {Homogeneous, Isotropic, Linearity for $\sigma$ NC, Linear for k} | NC                                 | k                               | Yes                        | NR                                                                    | NR                                   | Yes (In vitro)                            | NA                                             | NA                 | [49] |
| Analytic                                          | 1D                          | Prostate          | {Homogeneous, Isotropic, Linear}                                  | $\sigma$                           | NTA                             | NTA                        | NA                                                                    | NTA                                  | Yes (In vivo, mouse)                      | $E_{IRE(th)}$                                  | NA                 | [50] |
| COMSOL Multiphysics V4.2 (Finite element method)  | 2D                          | Rectal wall       | {Homogeneous, Isotropic, Linear}                                  | $\sigma$                           | NTA                             | No                         | Dirichlet (0 V)                                                       | NTA                                  | Yes (In vivo, pig)                        | NA                                             | NA                 | [51] |
| COMSOL Multiphysics (Finite element method)       | 2D                          | Pancreas          | {Homogeneous, Isotropic, Linear}                                  | $\sigma$                           | NTA                             | NTA                        | Dirichlet (0 V)                                                       | NTA                                  | Yes (In vivo, pig)                        | $E_{IRE(th)}$                                  | NA                 | [52] |
| COMSOL Multiphysics V4.4 (Finite element method)  | 2D                          | Liver             | {Homogeneous, Isotropic, Linear, Non-linear}                      | $\sigma(E)$                        | k                               | No                         | Neumann                                                               | Dirichlet ( $T_{env} = 37^\circ C$ ) | No                                        | NA                                             | NA                 | [53] |
| QuickField (Finite element method)                | 2D                          | Liver             | {Homogeneous, Heterogeneous, Isotropic, Non-linear}               | $\sigma(E)$                        | NTA                             | NTA                        | NR                                                                    | NTA                                  | Yes (In vivo, rat)                        | NA                                             | NA                 | [54] |
| CFdesign (Finite element method)                  | 3D                          | ND                | {Homogeneous, Isotropic, Linear}                                  | $\sigma$                           | k                               | No                         | Dirichlet (0 V)                                                       | Dirichlet ( $T_{init}$ )             | No                                        | NA                                             | NA                 | [55] |
| COMSOL Multiphysics V3.5A (Finite element method) | 3D                          | Prostate          | {Homogeneous, Heterogeneous, Isotropic, Non-linear}               | $\sigma(E)$                        | NTA                             | NTA                        | NR                                                                    | NTA                                  | Yes (In vivo, dog)                        | $\{E_{IRE(th)}, \sigma_{init}, \sigma_{max}\}$ | NA                 | [56] |
| COMSOL Multiphysics V3.5A                         | 3D                          | Brain             | {Homogeneous, Isotropic, Linear, Non-linear}                      | $\{\sigma, \sigma(E)\}$            | NTA                             | No                         | Neumann                                                               | NTA                                  | Yes (In vitro)                            | $E_{IRE(th)}$                                  | NA                 | [57] |

| Computer model                                    |                             | Tissue properties   |                                                                          |                                    |                                 |                            | Boundary conditions (BC) applied to boundaries at outer surface (BOS) |                                                                                                              | Experiments                               |                                          |                    |      |
|---------------------------------------------------|-----------------------------|---------------------|--------------------------------------------------------------------------|------------------------------------|---------------------------------|----------------------------|-----------------------------------------------------------------------|--------------------------------------------------------------------------------------------------------------|-------------------------------------------|------------------------------------------|--------------------|------|
| Used software package                             | Dimension of model geometry | Selected tissue     | Composition                                                              | Electrical conductivity dependence | Thermal conductivity dependence | Effect of blood perfusion? | Type electrical BC at BOS                                             | Type thermal BC at BOS                                                                                       | Performed experiment? (Experimental type) | Models/ parameters attempted to validate | Additional details | Ref. |
| (Finite element method)                           |                             |                     |                                                                          |                                    |                                 |                            |                                                                       |                                                                                                              |                                           |                                          |                    |      |
| COMSOL Multiphysics V3.5A (Finite element method) | 3D                          | Subcutaneous tissue | {Heterogeneous, Isotropic, Linear}                                       | $\sigma$                           | k                               | Yes                        | Neumann                                                               | Neumann                                                                                                      | No                                        | NA                                       | NA                 | [58] |
| COMSOL Multiphysics V3.5A (Finite element method) | 2D                          | Small intestine     | {Homogeneous, Heterogeneous, Isotropic, Anisotropic, Linear, Non-linear} | $\{\sigma, \sigma(E)\}$            | k                               | No                         | Neumann                                                               | Robin ( $h = 10 \text{ W}\cdot\text{m}^{-2}\cdot^\circ\text{C}^{-1}$ , $T_{\text{env}} = 20^\circ\text{C}$ ) | Yes (In vivo, rat)                        | NA                                       | NA                 | [59] |
| COMSOL Multiphysics V4.4                          | 3D                          | In vitro            | {Homogeneous, Isotropic, Linear, Non-linear}                             | $\sigma(T)$                        | k                               | No                         | Neumann                                                               | NR                                                                                                           | Yes (In vitro)                            | NA                                       | NA                 | [60] |
| COMSOL Multiphysics V4.3                          | 3D                          | In vitro            | {Homogeneous, Isotropic, Linear}                                         | $\sigma$                           | k                               | No                         | Neumann                                                               | {Neumann, Robin} (Upper part of electrodes: $h = 50 \text{ W}\cdot\text{m}^{-2}\cdot^\circ\text{C}^{-1}$ )   | Yes (In vitro)                            | $E_{\text{IRE(th)}}$                     | NA                 | [61] |
| COMSOL Multiphysics                               | 3D                          | Liver               | {Heterogeneous, Isotropic, Linear, Non-linear}                           | $\sigma(E, T)$                     | k                               | Yes                        | NR                                                                    | NR                                                                                                           | No                                        | NA                                       | NA                 | [62] |
| COMSOL Multiphysics V4.2A (Finite element method) | 3D                          | Kidney              | {Homogeneous, Isotropic, Linear, Non-linear}                             | $\{\sigma, \sigma(E)\}$            | NTA                             | No                         | Neumann                                                               | NTA                                                                                                          | Yes (In vivo, dog)                        | $\sigma(E)$                              | NA                 | [63] |
| NR                                                | 1D                          | Prostate            | {Homogeneous, Isotropic, Linear, Non-linear}                             | $\sigma(n_p)$                      | k                               | {Yes, No}                  | NA                                                                    | NA                                                                                                           | No                                        | NA                                       | NA                 | [64] |
| COMSOL Multiphysics (Finite element method)       | 2D                          | Kidney              | {Homogeneous, Isotropic, Linear}                                         | $\sigma$                           | k                               | NTA                        | NR                                                                    | NTA                                                                                                          | Yes (In vivo, pigs)                       | $E_{\text{IRE(th)}}$                     | NA                 | [65] |
| COMSOL Multiphysics V4.2A                         | 2D                          | Brain               | {Homogeneous, Isotropic, Linear, Non-Linear}                             | $\sigma(E)$                        | k                               | Yes                        | Neumann                                                               | NR                                                                                                           | No                                        | NA                                       | NA                 | [66] |
| COMSOL Multiphysics                               | 3D                          | Prostate            | {Homogeneous, Isotropic, Linear}                                         | $\sigma$                           | NTA                             | NTA                        | NR                                                                    | NR                                                                                                           | Yes (Clinical)                            | $E_{\text{IRE(th)}}$                     | NA                 | [67] |
| COMSOL Multiphysics V5.2                          | 3D                          | Prostate            | {Homogeneous, Isotropic, Linear, Non-linear}                             | $\{\sigma, \sigma(E)\}$            | NTA                             | NTA                        | NR                                                                    | NTA                                                                                                          | Yes (Clinical)                            | $E_{\text{IRE(th)}}$                     | NA                 | [68] |

| Computer model                                    |                             | Tissue properties |                                                     |                                    |                                 |                            | Boundary conditions (BC) applied to boundaries at outer surface (BOS) |                        | Experiments                               |                                         |                    |      |
|---------------------------------------------------|-----------------------------|-------------------|-----------------------------------------------------|------------------------------------|---------------------------------|----------------------------|-----------------------------------------------------------------------|------------------------|-------------------------------------------|-----------------------------------------|--------------------|------|
| Used software package                             | Dimension of model geometry | Selected tissue   | Composition                                         | Electrical conductivity dependence | Thermal conductivity dependence | Effect of blood perfusion? | Type electrical BC at BOS                                             | Type thermal BC at BOS | Performed experiment? (Experimental type) | Models/parameters attempted to validate | Additional details | Ref. |
| COMSOL Multiphysics                               | 3D                          | Brain             | {Heterogeneous, Isotropic, Linear, Non-linear}      | $\{\sigma, \sigma(E)\}$            | NTA                             | NTA                        | Neumann                                                               | NTA                    | Yes (Clinical)                            | NA                                      | NA                 | [69] |
| COMSOL Multiphysics                               | 3D                          | Pancreas          | {Homogeneous, Isotropic, Linear, Non-linear}        | $\sigma(E)$                        | k                               | Yes                        | Neumann                                                               | NR                     | Yes (Clinical)                            | NA                                      | NA                 | [70] |
| COMSOL Multiphysics V4.3A                         | 3D                          | Liver             | {Homogeneous, Heterogeneous, Isotropic, Non-linear} | $\sigma(E)$                        | NTA                             | NTA                        | NR                                                                    | NTA                    | No                                        | NA                                      | NA                 | [71] |
| Analytic                                          | 2D                          | Liver             | {Homogeneous, Isotropic, Linear}                    | $\sigma$                           | NTA                             | NTA                        | Dirichlet (0 V)                                                       | NTA                    | Yes (In vivo, rat)                        | NA                                      | NA                 | [72] |
| COMSOL Multiphysics V5.3 (Finite element method)  | 3D                          | {Brain, In vitro} | {Homogeneous, Isotropic, Linear, Non-linear}        | $\sigma(E, T)$                     | k                               | Yes                        | Neumann                                                               | Neumann                | Yes (In vitro)                            | $E_{IRE(th)}$                           | NA                 | [73] |
| COMSOL Multiphysics V4.2A (Finite element method) | 2D                          | Liver             | {Homogeneous, Isotropic, Linear}                    | $\sigma$                           | NTA                             | NTA                        | Neumann                                                               | NTA                    | Yes (In vivo, rabbit)                     | $E_{IRE(th)}$                           | NA                 | [74] |
| Marc (Finite element method)                      | 2D                          | In vitro          | {Homogeneous, Isotropic, Linear}                    | $\sigma$                           | NTA                             | NTA                        | {Dirichlet, Neumann} (0 V, Use of symmetry)                           | NTA                    | Yes (In vitro)                            | $E_{IRE(th)}$                           | NA                 | [75] |
| COMSOL Multiphysics V4.4 (Finite element method)  | NR                          | Liver             | {Homogeneous, Isotropic, Linear, Non-linear}        | $\sigma(E, T)$                     | k                               | Yes                        | NR                                                                    | NR                     | Yes (in vivo, rabbit)                     | $E_{IRE(th)}$                           | NA                 | [76] |
| COMSOL Multiphysics V5 (Finite element method)    | 3D                          | Liver             | {Homogeneous, Isotropic, Non-linear}                | $\sigma(E)$                        | NTA                             | NTA                        | NR                                                                    | NTA                    | Yes (ex vivo, cow)                        | NA                                      | NA                 | [77] |
| COMSOL Multiphysics V5.2A (Finite element method) | 2D                          | Cervix            | {Homogeneous, Isotropic, Non-linear}                | $\sigma(E, T_p)$                   | NTA                             | NTA                        | Neumann                                                               | NTA                    | Yes (In vitro)                            | NA                                      | NA                 | [78] |

| Computer model                                   |                             | Tissue properties |                                                |                                    |                                 |                            | Boundary conditions (BC) applied to boundaries at outer surface (BOS) |                        | Experiments                               |                                          |                    |      |
|--------------------------------------------------|-----------------------------|-------------------|------------------------------------------------|------------------------------------|---------------------------------|----------------------------|-----------------------------------------------------------------------|------------------------|-------------------------------------------|------------------------------------------|--------------------|------|
| Used software package                            | Dimension of model geometry | Selected tissue   | Composition                                    | Electrical conductivity dependence | Thermal conductivity dependence | Effect of blood perfusion? | Type electrical BC at BOS                                             | Type thermal BC at BOS | Performed experiment? (Experimental type) | Models/ parameters attempted to validate | Additional details | Ref. |
| IRENA (Finite difference method)                 | 3D                          | Liver             | {Heterogeneous, Isotropic, Linear, Non-linear} | $\sigma(E)$                        | NTA                             | NTA                        | {Neumann, Robin} (Parameter used is 0.01)                             | NTA                    | Yes (Clinical)                            | NA                                       | NA                 | [79] |
| COMSOL Multiphysics V5.2 (Finite element method) | 3D                          | Liver             | {Homogeneous, Isotropic, Linear, Non-linear}   | $\sigma(E, T)$                     | k                               | Yes                        | Neumann                                                               | Neumann                | Yes (Ex vivo, pig)                        | Pennes bioheat equation                  | NA                 | [80] |



**Table A6.2**

Table A6.2 Data about the tissue properties and the thresholds used in the included studies. This table was arranged according to the name of the media. The brackets “{ }” are defined as a set of elements, “[a, b]” is defined as the range between and including the values a and b assuming  $\{a, b\} \in \mathbb{R}$ , and “[a:c:b]” is defined as the range between and including the values a and b with step c assuming  $\{a, b, c\} \in \mathbb{R}$ . The following abbreviations are used: NR (Not reported), NA (Not applicable), NC (Not clear), NTA (No thermal analysis), ND (Not defined), and CAR (Cardiac autosynchronous rate). flc2hs is a Heavy side function in COMSOL Multiphysics.

|                                      | Calculation of V and E | Calculation of T      |                                         |                                        |                      |            |                                        |           | Calculation of $\Omega$ |                        |                                                 | Ablation parameters                                                                               |                                    |               |                         |      |
|--------------------------------------|------------------------|-----------------------|-----------------------------------------|----------------------------------------|----------------------|------------|----------------------------------------|-----------|-------------------------|------------------------|-------------------------------------------------|---------------------------------------------------------------------------------------------------|------------------------------------|---------------|-------------------------|------|
| Name                                 | $\sigma$               | $\rho$                | $c_p$ or $c_b$                          | k                                      | $Q_m$                | $T_{init}$ | $w_b$                                  | $T_{art}$ | A                       | $U_a$                  | Additional Details/<br>Parameters               | $E_{IRE(th)}$<br>( $V_{P(th)}$ , $t_{P(th)}$ ,<br>$N_{P(th)}$ , $\tau_{P(th)}$ ,<br>$f_{P(th)}$ ) | $T_{th}$<br>(Exposure<br>duration) | $\Omega_{th}$ | CEM43°C<br>( $t_{th}$ ) | Ref  |
|                                      | [S·m <sup>-1</sup> ]   | [kg·m <sup>-3</sup> ] | [J·kg <sup>-1</sup> ·°C <sup>-1</sup> ] | [W·m <sup>-1</sup> ·°C <sup>-1</sup> ] | [W·m <sup>-3</sup> ] | [°C]       | [kg·m <sup>-3</sup> ·s <sup>-1</sup> ] | [°C]      | [s <sup>-1</sup> ]      | [J·mol <sup>-1</sup> ] |                                                 | [V·m <sup>-1</sup> ]<br>([V], [s], [-],<br>[s], [Hz])                                             | [°C]<br>([s])                      |               | [min]                   |      |
| Acrylic resin                        | 1.0·10 <sup>-15</sup>  | NTA                   | NTA                                     | NTA                                    | NTA                  | NTA        | NTA                                    | NTA       | NTA                     | NTA                    | NA                                              | NA                                                                                                | NTA                                | NTA           | NTA                     | [47] |
| Air                                  | 1·10 <sup>-4</sup>     | 1.1614                | 1.007·10 <sup>-3</sup>                  | 0.026<br>3                             | NA                   | 37         | NA                                     | NA        | NA                      | NA                     | NA                                              | NA                                                                                                | NA                                 | NA            | NA                      | [36] |
| Air                                  | 1·10 <sup>-4</sup>     | 1.1614                | 1.007·10 <sup>-3</sup>                  | 0.026<br>3                             | NA                   | 37         | NA                                     | NA        | NA                      | NA                     | NA                                              | NA                                                                                                | NA                                 | NA            | NA                      | [41] |
| Bile duct filled with bile (Healthy) | 1.27                   | NA                    | NA                                      | NA                                     | NA                   | NA         | NA                                     | NA        | NA                      | NA                     | NA                                              | NA                                                                                                | NA                                 | NA            | NA                      | [64] |
| Blood                                | NA                     | NR                    | 3640                                    | NA                                     | NA                   | NA         | 1                                      | 37        | NA                      | NA                     | NA                                              | NA                                                                                                | NA                                 | NA            | NA                      | [3]  |
| Blood                                | NA                     | NR                    | NR                                      | NA                                     | NA                   | NA         | NR                                     | 37        | NA                      | NA                     | NA                                              | NA                                                                                                | NA                                 | NA            | NA                      | [24] |
| Blood                                | NR                     | 1000                  | 3640                                    | 0.39                                   | NA                   | NA         | 2                                      | 37.0<br>8 | NA                      | NA                     | $\omega_b = 0.002$<br>s <sup>-1</sup>           | 1000·10 <sup>2</sup><br>(NR, NR, NR,<br>NR, NR)<br>NA                                             | NA                                 | NA            | NA                      | [28] |
| Blood                                | NA                     | 1060                  | 3840                                    | NA                                     | NA                   | NA         | 7.579                                  | NR        | NA                      | NA                     | NA                                              | NA                                                                                                | NA                                 | NA            | NA                      | [31] |
| Blood                                | NA                     | NR                    | 3640                                    | NA                                     | NA                   | NA         | NR                                     | 37        | NA                      | NA                     | $\omega_b = 0.0005$ s <sup>-1</sup>             | NA                                                                                                | NA                                 | NA            | NA                      | [33] |
| Blood                                | NR                     | 1000                  | 3640                                    | NA                                     | NA                   | NA         | {0.1, 0.5, 1, 5, 10}                   | NR        | NA                      | NA                     | NA                                              | NA                                                                                                | NA                                 | NA            | NA                      | [34] |
| Blood                                | NA                     | NR                    | 3640                                    | NA                                     | NA                   | NA         | 1                                      | 21        | NA                      | NA                     | NA                                              | NA                                                                                                | NA                                 | NA            | NA                      | [37] |
| Blood                                | NA                     | NR                    | 3640                                    | NA                                     | NA                   | NA         | 1                                      | 37        | NA                      | NA                     | NA                                              | NA                                                                                                | NA                                 | NA            | NA                      | [39] |
| Blood                                | NA                     | 1060                  | 3840                                    | NA                                     | NA                   | NA         | 7.579                                  | 37        | NA                      | NA                     | $\omega_b = 7.15 \cdot 10^{-3}$ s <sup>-1</sup> | NA                                                                                                | NA                                 | NA            | NA                      | [40] |
| Blood                                | NA                     | 1000                  | 3640                                    | NA                                     | NA                   | NA         | 0.5                                    | 37        | NA                      | NA                     | $\omega_b = 0.0005$ s <sup>-1</sup>             | NA                                                                                                | NA                                 | NA            | NA                      | [41] |
| Blood                                | NA                     | 1060                  | 3600                                    | NA                                     | NA                   | NA         | 4.664                                  | 37        | NA                      | NA                     | $\omega_b = 0.0044$ s <sup>-1</sup>             | NA                                                                                                | NA                                 | NA            | NA                      | [42] |
| Blood                                | NA                     | 1000                  | 3640                                    | NA                                     | NA                   | NA         | {1, 6.4}                               | 37        | NA                      | NA                     | NA                                              | NA                                                                                                | NA                                 | NA            | NA                      | [48] |

|                               | Calculation of V and E | Calculation of T      |                                         |                                        |                      |            |                                        |           | Calculation of $\Omega$ |                        |                                                                                                            | Ablation parameters                                                                               |                                    |               |                        |      |
|-------------------------------|------------------------|-----------------------|-----------------------------------------|----------------------------------------|----------------------|------------|----------------------------------------|-----------|-------------------------|------------------------|------------------------------------------------------------------------------------------------------------|---------------------------------------------------------------------------------------------------|------------------------------------|---------------|------------------------|------|
| Name                          | $\sigma$               | $\rho$                | $c_p$ or $c_b$                          | k                                      | $Q_m$                | $T_{init}$ | $w_b$                                  | $T_{art}$ | A                       | $U_a$                  | Additional Details/<br>Parameters                                                                          | $E_{IRE(th)}$<br>( $V_{P(th)}$ , $t_{P(th)}$ ,<br>$N_{P(th)}$ , $\tau_{P(th)}$ ,<br>$f_{P(th)}$ ) | $T_{th}$<br>(Exposure<br>duration) | $\Omega_{th}$ | CEM43°C<br>( $_{th}$ ) | Ref  |
|                               | [S·m <sup>-1</sup> ]   | [kg·m <sup>-3</sup> ] | [J·kg <sup>-1</sup> ·°C <sup>-1</sup> ] | [W·m <sup>-1</sup> ·°C <sup>-1</sup> ] | [W·m <sup>-3</sup> ] | [°C]       | [kg·m <sup>-3</sup> ·s <sup>-1</sup> ] | [°C]      | [s <sup>-1</sup> ]      | [J·mol <sup>-1</sup> ] |                                                                                                            | [V·m <sup>-1</sup> ]<br>([V], [s], [-],<br>[s], [Hz])                                             | [°C]<br>([s])                      |               | [min]                  |      |
| Blood                         | 0.7                    | NTA                   | NTA                                     | NTA                                    | NTA                  | NTA        | NTA                                    | NTA       | NTA                     | NTA                    | NA                                                                                                         | NR                                                                                                | NTA                                | NTA           | NTA                    | [54] |
| Blood                         | NA                     | 1060                  | 3840                                    | NA                                     | NA                   | NA         | 19.08                                  | NR        | NA                      | NA                     | $\omega_b = 18 \cdot 10^{-3} \text{ s}^{-1}$                                                               | NA                                                                                                | NA                                 | NA            | NA                     | [62] |
| Blood                         | NA                     | 1060                  | 3840                                    | NA                                     | NA                   | NA         | 7.5790                                 | NR        | NA                      | NA                     | $\omega_b = 7.15 \cdot 10^{-3} \text{ s}^{-1}$                                                             | NA                                                                                                | NA                                 | NA            | NA                     | [66] |
| Blood                         | 0.7                    | NR                    | NR                                      | NR                                     | NR                   | NR         | NR                                     | NR        | NR                      | NR                     | NA                                                                                                         | NA                                                                                                | NR                                 | NR            | NR                     | [67] |
| Blood                         | NA                     | 1060                  | 3840                                    | NA                                     | NA                   | NA         | 212                                    | 37        | NR                      | NR                     | $\omega_b = 0.2 \text{ s}^{-1}$                                                                            | NA                                                                                                | NR                                 | NR            | NR                     | [70] |
| Blood                         | NA                     | 1060                  | 3850                                    | NA                                     | NA                   | NA         | NA                                     | 37        | NA                      | NA                     | $\omega_b = 7.15 \cdot 10^{-3} \text{ s}^{-1}$                                                             | NA                                                                                                | NA                                 | NA            | NA                     | [73] |
| Blood                         | NA                     | 1000                  | 4180                                    | NA                                     | NA                   | NA         | 6.4                                    | 37        | NA                      | NA                     | $\omega_b = 6.4 \cdot 10^{-3} \text{ s}^{-1}$                                                              | NA                                                                                                | NA                                 | NA            | NA                     | [76] |
| Blood vessel (Healthy)        | NR                     | NR                    | NR                                      | NR                                     | NR                   | NR         | NA                                     | NA        | NC                      | NC                     | $\sigma_{init} = 0.7 \text{ S} \cdot \text{m}^{-1}$<br>$\sigma_{max} = 1.05 \text{ S} \cdot \text{m}^{-1}$ | NA                                                                                                | 50 (NR)                            | 1             | NR                     | [62] |
| Blood vessel aorta (Healthy)  | NA                     | NA                    | NA                                      | NA                                     | NA                   | NA         | NA                                     | NA        | $5.6 \cdot 10^{63}$     | $0.43 \cdot 10^6$      | $\dot{R} = 8.314 \text{ J} \cdot \text{mol}^{-1} \cdot \text{K}^{-1}$                                      | NA                                                                                                | NR                                 | NR            | NR                     | [55] |
| Blood vessel artery (Healthy) | 0.6                    | 1000                  | 3750                                    | 0.5                                    | NR                   | 37         | NA                                     | NA        | $5.6 \cdot 10^{63}$     | $4.3 \cdot 10^5$       | $\dot{R} = 8.314 \text{ J} \cdot \text{mol}^{-1} \cdot \text{K}^{-1}$                                      | $1500 \cdot 10^2$ (NR, NR, NR, NR, NR)                                                            | NR                                 | 1             | NR                     | [33] |
| Blood vessel artery (Healthy) | [0.1:0.1:0.7]          | 1000                  | 3750                                    | 0.5                                    | NR                   | 37         | NA                                     | NA        | $5.6 \cdot 10^{63}$     | $4.3 \cdot 10^5$       | NA                                                                                                         | $1000 \cdot 10^2$ (NR, NR, NR, NR, NR)                                                            | NR                                 | NR            | NR                     | [34] |
| Blood vessel artery (Healthy) | 0.286                  | 1000                  | 3750                                    | 0.5                                    | NA                   | 37         | NA                                     | NA        | $5.6 \cdot 10^{63}$     | $430 \cdot 10^3$       | $\dot{R} = 8.314 \text{ J} \cdot \text{mol}^{-1} \cdot \text{K}^{-1}$                                      | $1750 \cdot 10^2$ (70, $100 \cdot 10^{-6}$ , 90, NA, {1, 4})                                      | 42                                 | 1             | NR                     | [36] |
| Blood vessel artery (Healthy) | 0.6                    | 1000                  | 3750                                    | 0.5                                    | NA                   | 37         | NA                                     | NA        | $5.6 \cdot 10^{63}$     | $4.3 \cdot 10^5$       | $\dot{R} = 8.314 \text{ J} \cdot \text{mol}^{-1} \cdot \text{K}^{-1}$                                      | $1750 \cdot 10^2$ (70, $100 \cdot 10^{-6}$ , 90, NA, 4)                                           | NR                                 | 1             | NR                     | [41] |
| Blood vessel including blood  | 0.7                    | NR                    | NR                                      | NR                                     | NR                   | NR         | NR                                     | NR        | NR                      | NR                     | NA                                                                                                         | NR                                                                                                | NR                                 | NR            | NR                     | [71] |
| Blood vessel wall (Healthy)   | 0.17                   | NTA                   | NTA                                     | NTA                                    | NTA                  | NTA        | NTA                                    | NTA       | NTA                     | NTA                    | NA                                                                                                         | NR                                                                                                | NTA                                | NTA           | NTA                    | [54] |
| Bone (Healthy)                | 0.02                   | NR                    | NR                                      | NR                                     | NR                   | NR         | NR                                     | NR        | NR                      | NR                     | NA                                                                                                         | NR                                                                                                | NR                                 | NR            | NR                     | [71] |
| Bone skull (Healthy)          | 0.02                   | NR                    | NR                                      | NR                                     | NA                   | NA         | NA                                     | NA        | NA                      | NA                     | NA                                                                                                         | NA                                                                                                | NA                                 | NA            | NA                     | [69] |

|                                   | Calculation of V and E                                                                                            | Calculation of T      |                                         |                                        |                      |                                 |                                        |           | Calculation of $\Omega$ |                        |                                                                                                                                                                                                                                      | Ablation parameters                                                                               |                                           |               |                        |          |
|-----------------------------------|-------------------------------------------------------------------------------------------------------------------|-----------------------|-----------------------------------------|----------------------------------------|----------------------|---------------------------------|----------------------------------------|-----------|-------------------------|------------------------|--------------------------------------------------------------------------------------------------------------------------------------------------------------------------------------------------------------------------------------|---------------------------------------------------------------------------------------------------|-------------------------------------------|---------------|------------------------|----------|
| Name                              | $\sigma$                                                                                                          | $\rho$                | $c_p$ or $c_b$                          | k                                      | $Q_m$                | $T_{init}$                      | $w_b$                                  | $T_{art}$ | A                       | $U_a$                  | Additional Details/<br>Parameters                                                                                                                                                                                                    | $E_{IRE(th)}$<br>( $V_{P(th)}$ , $t_{P(th)}$ ,<br>$N_{P(th)}$ , $\tau_{P(th)}$ ,<br>$f_{P(th)}$ ) | $T_{th}$<br>(Exposure<br>duration)        | $\Omega_{th}$ | CEM43°C<br>( $_{th}$ ) | Ref      |
|                                   | [S·m <sup>-1</sup> ]                                                                                              | [kg·m <sup>-3</sup> ] | [J·kg <sup>-1</sup> ·°C <sup>-1</sup> ] | [W·m <sup>-1</sup> ·°C <sup>-1</sup> ] | [W·m <sup>-3</sup> ] | [°C]                            | [kg·m <sup>-3</sup> ·s <sup>-1</sup> ] | [°C]      | [s <sup>-1</sup> ]      | [J·mol <sup>-1</sup> ] |                                                                                                                                                                                                                                      | [V·m <sup>-1</sup> ]<br>([V], [s], [-],<br>[s], [Hz])                                             | [°C]<br>([s])                             |               | [min]                  |          |
| Brain<br>(Cancerous)              | $\sigma_{init} = 0.435 \text{ S·m}^{-1}$<br>$\sigma_{max} = 0.7373 \text{ S·m}^{-1}$                              | NR                    | NR                                      | NR                                     | NR                   | NR                              | NR                                     | NR        | NR                      | NR                     | NA                                                                                                                                                                                                                                   | NC                                                                                                | NR                                        | NR            | NR                     | [69<br>] |
| Brain<br>(Healthy)                | 0.258                                                                                                             | 1039                  | 3680                                    | 0.056<br>5                             | 10437                | 37                              | NA                                     | NR        | NR                      | NR                     | NA                                                                                                                                                                                                                                   | 700·10 <sup>2</sup><br>(NR, NR, 90,<br>NR, NR)                                                    | 42<br>(If sustained for<br>long duration) | NR            | NR                     | [66<br>] |
| Brain gray<br>matter<br>(Healthy) | $\sigma(E, T) = \sigma_{init} \cdot (1 +$<br>$f_{lc2hs}(E - E_{alt}, E_{range})$<br>$+ \xi \cdot (T - T_{init}))$ | 1039                  | 3680                                    | 0.565                                  | 10437                | 36.1<br>( $V_P =$<br>500V<br>)  | NA                                     | NA        | NA                      | NA                     | $\sigma_{init} = 0.12$<br>S·m <sup>-1</sup><br>( $V_P =$<br>500V)<br><br>$\xi = 0.032$<br>°C <sup>-1</sup><br>$E_{alt} =$<br>580·10 <sup>2</sup><br>V·m <sup>-1</sup><br>$E_{range} =$<br>$\pm 120 \cdot 10^2$<br>V·m <sup>-1</sup>  | 495·10 <sup>2</sup><br>(500, 50·10 <sup>-6</sup> ,<br>9 sets ×10<br>pulses, NA, 4)                | NR                                        | NA            | 60                     | [31<br>] |
| Brain gray<br>matter<br>(Healthy) | $\sigma(E, T) = \sigma_{init} \cdot (1 +$<br>$f_{lc2hs}(E - E_{alt}, E_{range})$<br>$+ \xi \cdot (T - T_{init}))$ | 1039                  | 3680                                    | 0.565                                  | 10437                | 36.8<br>( $V_P =$<br>1000<br>V) | NA                                     | NA        | NA                      | NA                     | $\sigma_{init} = 0.30$<br>S·m <sup>-1</sup><br>( $V_P =$<br>1000V)<br><br>$\xi = 0.032$<br>°C <sup>-1</sup><br>$E_{alt} =$<br>580·10 <sup>2</sup><br>V·m <sup>-1</sup><br>$E_{range} =$<br>$\pm 120 \cdot 10^2$<br>V·m <sup>-1</sup> | 510·10 <sup>2</sup><br>(1000, 50·10 <sup>-6</sup> ,<br>9 sets ×10<br>pulses, NA, 4)               | NR                                        | NA            | 60                     | [31<br>] |
| Brain gray<br>matter<br>(Healthy) | $\sigma = \sigma_{init}$                                                                                          | NTA                   | NTA                                     | NTA                                    | NTA                  | NTA                             | NTA                                    | NTA       | NR                      | NR                     | $\sigma_{init} =$<br>0.285 S·m <sup>-1</sup>                                                                                                                                                                                         | 800·10 <sup>2</sup><br>(NR, 50·10 <sup>-6</sup> ,<br>80, NA, 1)                                   | NR                                        | NR            | NR                     | [57<br>] |
| Brain gray<br>matter<br>(Healthy) | $\sigma(E) = \sigma_{init} + (\sigma_{max} -$<br>$\sigma_{init}) \cdot \exp(-a_1 \cdot \exp(-$<br>$a_2 \cdot E))$ | NTA                   | NTA                                     | NTA                                    | NTA                  | NTA                             | NTA                                    | NTA       | NR                      | NR                     | $\sigma_{init} =$<br>0.285 S·m <sup>-1</sup><br>$\sigma_{max} =$<br>0.7791 S·m <sup>-1</sup><br>$a_1 = 3.053$<br>$a_2 =$<br>0.00233<br>m·V <sup>-1</sup>                                                                             | 800·10 <sup>2</sup><br>(NR, 50·10 <sup>-6</sup> ,<br>80, NA, 1)                                   | NR                                        | NR            | NR                     | [57<br>] |

|                              | Calculation of V and E                                                                                              | Calculation of T      |                                         |                                        |                      |            |                                        |           | Calculation of $\Omega$ |                        |                                                                                                                                                                                            | Ablation parameters                                                                               |                                                  |               |                        |      |
|------------------------------|---------------------------------------------------------------------------------------------------------------------|-----------------------|-----------------------------------------|----------------------------------------|----------------------|------------|----------------------------------------|-----------|-------------------------|------------------------|--------------------------------------------------------------------------------------------------------------------------------------------------------------------------------------------|---------------------------------------------------------------------------------------------------|--------------------------------------------------|---------------|------------------------|------|
| Name                         | $\sigma$                                                                                                            | $\rho$                | $c_p$ or $c_b$                          | k                                      | $Q_m$                | $T_{init}$ | $w_b$                                  | $T_{art}$ | A                       | $U_a$                  | Additional Details/<br>Parameters                                                                                                                                                          | $E_{IRE(th)}$<br>( $V_{P(th)}$ , $t_{P(th)}$ ,<br>$N_{P(th)}$ , $\tau_{P(th)}$ ,<br>$f_{P(th)}$ ) | $T_{th}$<br>(Exposure<br>duration)               | $\Omega_{th}$ | CEM43°C<br>( $_{th}$ ) | Ref  |
|                              | [S·m <sup>-1</sup> ]                                                                                                | [kg·m <sup>-3</sup> ] | [J·kg <sup>-1</sup> ·°C <sup>-1</sup> ] | [W·m <sup>-1</sup> ·°C <sup>-1</sup> ] | [W·m <sup>-3</sup> ] | [°C]       | [kg·m <sup>-3</sup> ·s <sup>-1</sup> ] | [°C]      | [s <sup>-1</sup> ]      | [J·mol <sup>-1</sup> ] |                                                                                                                                                                                            | [V·m <sup>-1</sup> ]<br>([V], [s], [-],<br>[s], [Hz])                                             | [°C]<br>([s])                                    |               | [min]                  |      |
| Brain gray matter (Healthy)  | $\sigma_{init} = 0.285 \text{ S·m}^{-1}$<br>$\sigma_{max} = 0.7359 \text{ S·m}^{-1}$                                | NR                    | NR                                      | NR                                     | NR                   | NR         | NR                                     | NR        | NR                      | NR                     | NA                                                                                                                                                                                         | NC                                                                                                | NR                                               | NR            | NR                     | [69] |
| Brain gray matter (Healthy)  | $\sigma(E, T) = \sigma_{init} \cdot (1 + 2 \cdot \text{flc}2hs(E - E_{alt}, E_{range}) + \xi \cdot (T - T_{init}))$ | 1039                  | 3680                                    | 0.565                                  | 10437                | 37         | NA                                     | NA        | NR                      | NR                     | $\xi = 0.032 \text{ } ^\circ\text{C}^{-1}$<br>$\sigma_{init} = 0.285 \text{ S·m}^{-1}$<br>$E_{alt} = 580 \cdot 10^2 \text{ V·m}^{-1}$<br>$E_{range} = \pm 120 \cdot 10^2 \text{ V·m}^{-1}$ | 745·10 <sup>2</sup><br>(450, 100·10 <sup>-6</sup> , 80, NA, 1)                                    | NR                                               | NR            | NR                     | [73] |
| Brain white matter (Healthy) | $\sigma(E, T) = \sigma_{init} \cdot (1 + 2 \cdot \text{flc}2hs(E - E_{alt}, E_{range}) + \xi \cdot (T - T_{init}))$ | 1039                  | 3680                                    | 0.565                                  | 10437                | 37         | NA                                     | NA        | 2.984·10 <sup>80</sup>  | 5.064·10 <sup>5</sup>  | $\sigma_{init} = 0.256 \text{ S·m}^{-1}$<br>$\sigma_{max} = 0.767 \text{ S·m}^{-1}$<br>$\xi = 0.032 \text{ } ^\circ\text{C}^{-1}$<br>$E_{alt} = \text{NR}$<br>$E_{range} = \text{NR}$      | 500·10 <sup>2</sup><br>(NR, NR, NR, NR, NR)                                                       | 50<br>(Instantaneous)<br><br>43<br>(Long period) | 0.53          | NR                     | [40] |
| Brain white matter (Healthy) | $\sigma(T) = \sigma_{init} \cdot (1 + \xi \cdot (T - T_{init}))$                                                    | 1039                  | 3680                                    | 0.565                                  | 10437                | 37         | NA                                     | NA        | 2.984·10 <sup>80</sup>  | 5.064·10 <sup>5</sup>  | $\sigma_{init} = 0.256 \text{ S·m}^{-1}$<br>$\sigma_{max} = 0.767 \text{ S·m}^{-1}$<br>$\xi = 0.032 \text{ } ^\circ\text{C}^{-1}$<br>$E_{alt} = \text{NR}$<br>$E_{range} = \text{NR}$      | 500·10 <sup>2</sup><br>(NR, NR, NR, NR, NR)                                                       | 50<br>(Instantaneous)<br><br>43<br>(Long period) | 0.53          | NR                     | [40] |
| Brain white matter (Healthy) | $\sigma_{init} = 0.3621 \text{ S·m}^{-1}$<br>$\sigma_{max} = 0.7357 \text{ S·m}^{-1}$                               | NR                    | NR                                      | NR                                     | NR                   | NR         | NR                                     | NR        | NR                      | NR                     | NA                                                                                                                                                                                         | NC                                                                                                | NR                                               | NR            | NR                     | [69] |
| Breast (Cancerous)           | 2.31                                                                                                                | 1186                  | 2926                                    | 0.48                                   | NR                   | 37.08      | NA                                     | NA        | NR                      | NR                     | NA                                                                                                                                                                                         | 1000·10 <sup>2</sup><br>(NR, NR, NR, NR, NR)                                                      | NR                                               | 1             | NR                     | [28] |
| Breast (Cancerous)           | [0.025, 0.25]                                                                                                       | 1044                  | 3700                                    | 0.564                                  | 65400                | 37         | NR                                     | NR        | NR                      | NR                     | $w_b \cdot c_b = 48000 \text{ W·m}^{-3} \cdot ^\circ\text{C}^{-1}$                                                                                                                         | 1000·10 <sup>2</sup><br>(NR, 100·10 <sup>-6</sup> , 80, NA, 1)                                    | 50 - 60                                          | NR            | 90                     | [29] |
| Breast (Cancerous)           | 0.25                                                                                                                | NTA                   | NTA                                     | NTA                                    | NTA                  | NTA        | NTA                                    | NTA       | NR                      | NR                     | NA                                                                                                                                                                                         | 1000·10 <sup>2</sup><br>(NR, NR, NR, NR, NR)                                                      | NR                                               | NR            | NR                     | [35] |
| Breast (Healthy)             | [0.25, 0.025]                                                                                                       | 928                   | 3550                                    | 0.499                                  | 700                  | 37         | NR                                     | NR        | NR                      | NR                     | $w_b \cdot c_b = 2400 \text{ W·m}^{-3} \cdot ^\circ\text{C}^{-1}$                                                                                                                          | 1000·10 <sup>2</sup><br>(NR, 100·10 <sup>-6</sup> , 80, NA, 1)                                    | 50 - 60                                          | NR            | 90                     | [29] |

|                                          | Calculation of V and E                                                                                 | Calculation of T      |                                         |                                        |                      |            |                                        |           | Calculation of $\Omega$ |                        |                                                                                                                                                                                                                                                              | Ablation parameters                                                                               |                                    |               |                        |      |
|------------------------------------------|--------------------------------------------------------------------------------------------------------|-----------------------|-----------------------------------------|----------------------------------------|----------------------|------------|----------------------------------------|-----------|-------------------------|------------------------|--------------------------------------------------------------------------------------------------------------------------------------------------------------------------------------------------------------------------------------------------------------|---------------------------------------------------------------------------------------------------|------------------------------------|---------------|------------------------|------|
| Name                                     | $\sigma$                                                                                               | $\rho$                | $c_p$ or $c_b$                          | k                                      | $Q_m$                | $T_{init}$ | $w_b$                                  | $T_{art}$ | A                       | $U_a$                  | Additional Details/<br>Parameters                                                                                                                                                                                                                            | $E_{IRE(th)}$<br>( $V_{P(th)}$ , $t_{P(th)}$ ,<br>$N_{P(th)}$ , $\tau_{P(th)}$ ,<br>$f_{P(th)}$ ) | $T_{th}$<br>(Exposure<br>duration) | $\Omega_{th}$ | CEM43°C<br>( $_{th}$ ) | Ref  |
|                                          | [S·m <sup>-1</sup> ]                                                                                   | [kg·m <sup>-3</sup> ] | [J·kg <sup>-1</sup> ·°C <sup>-1</sup> ] | [W·m <sup>-1</sup> ·°C <sup>-1</sup> ] | [W·m <sup>-3</sup> ] | [°C]       | [kg·m <sup>-3</sup> ·s <sup>-1</sup> ] | [°C]      | [s <sup>-1</sup> ]      | [J·mol <sup>-1</sup> ] |                                                                                                                                                                                                                                                              | [V·m <sup>-1</sup> ]<br>([V], [s], [-],<br>[s], [Hz])                                             | [°C]<br>([s])                      |               | [min]                  |      |
| Breast fatty peripheral tissue (Healthy) | 0.02                                                                                                   | NTA                   | NTA                                     | NTA                                    | NTA                  | NTA        | NTA                                    | NTA       | NR                      | NR                     | NA                                                                                                                                                                                                                                                           | NR                                                                                                | NR                                 | NR            | NR                     | [35] |
| Breast fatty tissue (Healthy)            | 0.024                                                                                                  | 900                   | 2522                                    | 0.25                                   | NR                   | 37.08      | NA                                     | NA        | 4.43·10 <sup>16</sup>   | 1.29·10 <sup>5</sup>   | NA                                                                                                                                                                                                                                                           | 1000·10 <sup>2</sup><br>(NR, NR, NR, NR, NR)                                                      | NR                                 | 1             | NR                     | [28] |
| Breast gland (Healthy)                   | 0.52                                                                                                   | 1030                  | 3492                                    | 0.41                                   | NR                   | 37.08      | NA                                     | NA        | NR                      | NR                     | NA                                                                                                                                                                                                                                                           | 1000·10 <sup>2</sup><br>(NR, NR, NR, NR, NR)                                                      | NR                                 | 1             | NR                     | [28] |
| Breast myoepithelial cell (Healthy)      | 1·10 <sup>-7</sup>                                                                                     | NR                    | NR                                      | NR                                     | NR                   | 37.08      | NA                                     | NA        | NR                      | NR                     | NA                                                                                                                                                                                                                                                           | 1000·10 <sup>2</sup><br>(NR, NR, NR, NR, NR)                                                      | NR                                 | 1             | NR                     | [28] |
| Cervix (Cancerous)                       | $\sigma(E) = \sigma_{init} + (\sigma_{max} - \sigma_{init}) \cdot \exp(-a_1 \cdot \exp(-a_2 \cdot E))$ | NR                    | NR                                      | NR                                     | NR                   | NR         | NR                                     | NR        | NR                      | NR                     | $\sigma_{init} = 0.22973$<br>S·m <sup>-1</sup><br>$\sigma_{max} = 0.64324$<br>S·m <sup>-1</sup><br>$a_1 = -5 \cdot 10^{-6} \cdot t_p^2 + 0.004 \cdot t_p + 2.803$<br>$a_2 = -7 \cdot 10^{-9} \cdot t_p^2 + 5 \cdot 10^{-6} t_p + 0.002$<br>m·V <sup>-1</sup> | 600·10 <sup>2</sup><br>(NR, NR, NR, NR, NR)                                                       | NR                                 | NR            | NR                     | [78] |
| Cervix (Healthy)                         | 0.2033                                                                                                 | NR                    | NR                                      | NR                                     | NR                   | NR         | NR                                     | NR        | NR                      | NR                     | NA                                                                                                                                                                                                                                                           | NR                                                                                                | NR                                 | NR            | NR                     | [78] |
| Colon (Healthy)                          | 0.01                                                                                                   | NR                    | NR                                      | NR                                     | NR                   | NR         | NR                                     | NR        | NR                      | NR                     | NA                                                                                                                                                                                                                                                           | NR                                                                                                | NR                                 | NR            | NR                     | [67] |
| Connective tissue                        | 0.03                                                                                                   | NR                    | NR                                      | NR                                     | NR                   | NR         | NA                                     | NA        | NR                      | NR                     | NR                                                                                                                                                                                                                                                           | NR                                                                                                | NR                                 | NR            | NR                     | [45] |
| Electrode                                | 6·10 <sup>7</sup>                                                                                      | NR                    | NR                                      | 100                                    | NA                   | 37         | NA                                     | NA        | NA                      | NA                     | NA                                                                                                                                                                                                                                                           | NA                                                                                                | NA                                 | NA            | NA                     | [34] |
| Electrode                                | NR                                                                                                     | 7900                  | 500                                     | 15                                     | NA                   | NR         | NA                                     | NA        | NA                      | NA                     | NA                                                                                                                                                                                                                                                           | NA                                                                                                | NA                                 | NA            | NA                     | [53] |
| Electrode                                | $\sigma(T) = 1.73913 \cdot 10^6 \cdot (1 + 0.00094 \cdot (T - 20))$                                    | 8000                  | 500                                     | 15                                     | NA                   | NA         | NA                                     | NA        | NA                      | NA                     | NA                                                                                                                                                                                                                                                           | NA                                                                                                | NA                                 | NA            | NA                     | [60] |
| Electrode                                | 4.03·10 <sup>6</sup>                                                                                   | 7850                  | 475                                     | 44.5                                   | NA                   | 20         | NA                                     | NA        | NA                      | NA                     | NA                                                                                                                                                                                                                                                           | NA                                                                                                | NA                                 | NA            | NA                     | [61] |
| Electrode                                | 1·10 <sup>6</sup>                                                                                      | 6000                  | 500                                     | 15                                     | NR                   | 37         | NA                                     | NA        | NA                      | NA                     | NA                                                                                                                                                                                                                                                           | NA                                                                                                | NA                                 | NA            | NA                     | [62] |

|                             | Calculation of V and E | Calculation of T      |                                         |                                        |                      |            |                                        |           | Calculation of $\Omega$ |                        |                                   | Ablation parameters                                                                               |                                    |               |                        |      |
|-----------------------------|------------------------|-----------------------|-----------------------------------------|----------------------------------------|----------------------|------------|----------------------------------------|-----------|-------------------------|------------------------|-----------------------------------|---------------------------------------------------------------------------------------------------|------------------------------------|---------------|------------------------|------|
| Name                        | $\sigma$               | $\rho$                | $c_p$ or $c_b$                          | k                                      | $Q_m$                | $T_{init}$ | $w_b$                                  | $T_{art}$ | A                       | $U_a$                  | Additional Details/<br>Parameters | $E_{IRE(th)}$<br>( $V_{P(th)}$ , $t_{P(th)}$ ,<br>$N_{P(th)}$ , $\tau_{P(th)}$ ,<br>$f_{P(th)}$ ) | $T_{th}$<br>(Exposure<br>duration) | $\Omega_{th}$ | CEM43°C<br>( $_{th}$ ) | Ref  |
|                             | [S·m <sup>-1</sup> ]   | [kg·m <sup>-3</sup> ] | [J·kg <sup>-1</sup> ·°C <sup>-1</sup> ] | [W·m <sup>-1</sup> ·°C <sup>-1</sup> ] | [W·m <sup>-3</sup> ] | [°C]       | [kg·m <sup>-3</sup> ·s <sup>-1</sup> ] | [°C]      | [s <sup>-1</sup> ]      | [J·mol <sup>-1</sup> ] |                                   | [V·m <sup>-1</sup> ]<br>([V], [s], [-],<br>[s], [Hz])                                             | [°C]<br>([s])                      |               | [min]                  |      |
| Electrode                   | 2.22·10 <sup>6</sup>   | 7900                  | 500                                     | 15                                     | NA                   | NR         | NA                                     | NA        | NR                      | NR                     | NA                                | NA                                                                                                | NR                                 | NR            | NR                     | [70] |
| Electrode                   | 1·10 <sup>5</sup>      | NR                    | NR                                      | NR                                     | NR                   | NR         | NR                                     | NR        | NA                      | NA                     | NA                                | NA                                                                                                | NA                                 | NA            | NA                     | [71] |
| Electrode (Aluminum)        | 3.774·10 <sup>7</sup>  | 2700                  | 910                                     | 250                                    | NA                   | 37         | NA                                     | NR        | NR                      | NR                     | NA                                | NA                                                                                                | NA                                 | NA            | NA                     | [58] |
| Electrode (Copper)          | 5.998·10 <sup>7</sup>  | 8700                  | 385                                     | 400                                    | NA                   | 37         | NA                                     | NA        | NA                      | NA                     | NA                                | NA                                                                                                | NA                                 | NA            | NA                     | [36] |
| Electrode (Copper)          | 5.998·10 <sup>7</sup>  | 8700                  | 385                                     | 400                                    | NA                   | 37         | NA                                     | NA        | NA                      | NA                     | NA                                | NA                                                                                                | NA                                 | NA            | NA                     | [41] |
| Electrode (Copper)          | 5.88·10 <sup>7</sup>   | 8940                  | 380                                     | 380                                    | NA                   | NR         | NA                                     | NA        | NA                      | NA                     | NA                                | NA                                                                                                | NR                                 | NR            | NR                     | [55] |
| Electrode (Copper)          | 5.998·10 <sup>7</sup>  | 8700                  | 385                                     | 400                                    | NA                   | NR         | NA                                     | NA        | NA                      | NA                     | NA                                | NA                                                                                                | NA                                 | NA            | NA                     | [66] |
| Electrode (Endovascular)    | 4.032·10 <sup>6</sup>  | NR                    | 100                                     | NR                                     | NA                   | 37         | NA                                     | NA        | NA                      | NA                     | NA                                | NA                                                                                                | NA                                 | NA            | NA                     | [41] |
| Electrode (Silver)          | 6.273·10 <sup>7</sup>  | 10500                 | 234                                     | 429                                    | NA                   | NR         | NA                                     | NA        | NA                      | NA                     | NA                                | NA                                                                                                | NA                                 | NA            | NA                     | [66] |
| Electrode (Stainless steel) | 2222222                | 7900                  | 477                                     | 14                                     | NA                   | 25         | NA                                     | NA        | NA                      | NA                     | NA                                | NA                                                                                                | NA                                 | NA            | NA                     | [25] |
| Electrode (Stainless steel) | 2.22·10 <sup>6</sup>   | 7900                  | 500                                     | 15                                     | NA                   | NR         | NA                                     | NA        | NA                      | NA                     | NA                                | NA                                                                                                | NA                                 | NA            | NA                     | [40] |
| Electrode (Stainless steel) | 2.22·10 <sup>6</sup>   | 7900                  | 477                                     | 14                                     | NA                   | 22         | NA                                     | NA        | NA                      | NA                     | NA                                | NA                                                                                                | NA                                 | NA            | NA                     | [43] |
| Electrode (Stainless steel) | 1.44·10 <sup>6</sup>   | NTA                   | NTA                                     | NTA                                    | NTA                  | NTA        | NTA                                    | NTA       | NTA                     | NTA                    | NA                                | NA                                                                                                | NTA                                | NTA           | NTA                    | [47] |
| Electrode (Stainless steel) | 2·10 <sup>6</sup>      | NR                    | NR                                      | NR                                     | NA                   | NR         | NA                                     | NA        | NA                      | NA                     | NA                                | NA                                                                                                | NA                                 | NA            | NA                     | [68] |
| Electrode (Stainless steel) | 2.22·10 <sup>6</sup>   | NR                    | 477                                     | 14.9                                   | NA                   | NR         | NA                                     | NA        | NA                      | NA                     | NA                                | NA                                                                                                | NA                                 | NA            | NA                     | [73] |
| Electrode (Stainless steel) | 7.4·10 <sup>6</sup>    | 8000                  | 480                                     | 15                                     | NA                   | 37         | NA                                     | NA        | NA                      | NA                     | NA                                | NA                                                                                                | NA                                 | NA            | NA                     | [76] |
| Electrode (Stainless steel) | 2.22·10 <sup>6</sup>   | 7900                  | 500                                     | 15                                     | NA                   | 26         | NA                                     | NA        | NA                      | NA                     | NA                                | NA                                                                                                | NA                                 | NA            | NA                     | [80] |

|                                                  | Calculation of V and E                              | Calculation of T      |                                         |                                        |                      |                 |                                        |           | Calculation of $\Omega$           |                        |                                                               | Ablation parameters                                                                               |                                    |               |                        |      |
|--------------------------------------------------|-----------------------------------------------------|-----------------------|-----------------------------------------|----------------------------------------|----------------------|-----------------|----------------------------------------|-----------|-----------------------------------|------------------------|---------------------------------------------------------------|---------------------------------------------------------------------------------------------------|------------------------------------|---------------|------------------------|------|
| Name                                             | $\sigma$                                            | $\rho$                | $c_p$ or $c_b$                          | k                                      | $Q_m$                | $T_{init}$      | $w_b$                                  | $T_{art}$ | A                                 | $U_a$                  | Additional Details/<br>Parameters                             | $E_{IRE(th)}$<br>( $V_{P(th)}$ , $t_{P(th)}$ ,<br>$N_{P(th)}$ , $\tau_{P(th)}$ ,<br>$f_{P(th)}$ ) | $T_{th}$<br>(Exposure<br>duration) | $\Omega_{th}$ | CEM43°C<br>( $_{th}$ ) | Ref  |
|                                                  | [S·m <sup>-1</sup> ]                                | [kg·m <sup>-3</sup> ] | [J·kg <sup>-1</sup> ·°C <sup>-1</sup> ] | [W·m <sup>-1</sup> ·°C <sup>-1</sup> ] | [W·m <sup>-3</sup> ] | [°C]            | [kg·m <sup>-3</sup> ·s <sup>-1</sup> ] | [°C]      | [s <sup>-1</sup> ]                | [J·mol <sup>-1</sup> ] |                                                               | [V·m <sup>-1</sup> ]<br>([V], [s], [-],<br>[s], [Hz])                                             | [°C]<br>([s])                      |               | [min]                  |      |
| Electrode insulation                             | 1·10 <sup>-5</sup>                                  | 800                   | 3400                                    | 0.01                                   | NA                   | NR              | NA                                     | NA        | NA                                | NA                     | NA                                                            | NA                                                                                                | NA                                 | NA            | NA                     | [31] |
| Electrode insulation                             | 1·10 <sup>-5</sup>                                  | 800                   | 3400                                    | 0.01                                   | NA                   | NR              | NA                                     | NA        | NA                                | NA                     | NA                                                            | NA                                                                                                | NA                                 | NA            | NA                     | [40] |
| Electrode insulation                             | NR                                                  | 800                   | 3400                                    | 0.01                                   | NA                   | NR              | NA                                     | NA        | NA                                | NA                     | NA                                                            | NA                                                                                                | NA                                 | NA            | NA                     | [53] |
| Electrode insulation                             | 1·10 <sup>-5</sup>                                  | 800                   | 3400                                    | 0.01                                   | NA                   | NR              | NA                                     | NA        | NR                                | NR                     | NA                                                            | NA                                                                                                | NR                                 | NR            | NR                     | [70] |
| Electrode insulation                             | 1·10 <sup>-5</sup>                                  | NR                    | NR                                      | NR                                     | NR                   | NR              | NR                                     | NR        | NA                                | NA                     | NA                                                            | NA                                                                                                | NA                                 | NA            | NA                     | [71] |
| Electrode insulation                             | 1·10 <sup>-12</sup>                                 | 2329                  | 700                                     | NC                                     | NA                   | 26              | NA                                     | NA        | NA                                | NA                     | NA                                                            | NA                                                                                                | NA                                 | NA            | NA                     | [80] |
| Eye (Cancerous)                                  | {0.08305, 0.1661, 0.3322, 0.4983, 0.6644}           | 1030                  | 3000                                    | 0.4                                    | NA                   | 36.5            | NA                                     | NA        | NR                                | NR                     | NA                                                            | NR                                                                                                | NR                                 | NR            | NR                     | [44] |
| Eye aqueous (Healthy)                            | 1.5                                                 | 1010                  | 3997                                    | 0.58                                   | NA                   | [34.2 5, 35.32] | NA                                     | NA        | NR                                | NR                     | NA                                                            | NR                                                                                                | NR                                 | NR            | NR                     | [44] |
| Eye cornea (Healthy)                             | 0.427                                               | 1076                  | 4178                                    | 0.58                                   | NA                   | 34.25           | NA                                     | NA        | NR                                | NR                     | NA                                                            | NR                                                                                                | NR                                 | NR            | NR                     | [44] |
| Eye lens (Healthy)                               | 0.3322                                              | 1100                  | 3000                                    | 0.4                                    | NA                   | [35.3 2, 36]    | NA                                     | NA        | NR                                | NR                     | NA                                                            | NR                                                                                                | NR                                 | NR            | NR                     | [44] |
| Eye retina (Healthy)                             | 0.5075                                              | 1039                  | 3000                                    | 0.5                                    | NA                   | 36.7            | NA                                     | 37        | NR                                | NR                     | NA                                                            | NR                                                                                                | NR                                 | NR            | NR                     | [44] |
| Eye sclera (Healthy)                             | 0.5075                                              | 1100                  | 3180                                    | 1.004 2                                | NA                   | 36.7            | NA                                     | 37        | NR                                | NR                     | NA                                                            | NR                                                                                                | NR                                 | NR            | NR                     | [44] |
| Eye vitreous (Healthy)                           | 1.5                                                 | 1000                  | 4178                                    | 0.603                                  | NA                   | [36, 36.5]      | NA                                     | NA        | NR                                | NR                     | NA                                                            | NR                                                                                                | NR                                 | NR            | NR                     | [44] |
| Fat                                              | 0.012                                               | NR                    | NR                                      | NR                                     | NR                   | NR              | NA                                     | NA        | NA                                | NA                     | NA                                                            | NA                                                                                                | NA                                 | NA            | NA                     | [45] |
| Fat                                              | 0.012                                               | NR                    | NR                                      | NR                                     | NR                   | NR              | NR                                     | NR        | NR                                | NR                     | NA                                                            | NA                                                                                                | NR                                 | NR            | NR                     | [67] |
| FR4                                              | 0.004                                               | 1900                  | 1369                                    | 0.3                                    | NA                   | 37              | NA                                     | NA        | NA                                | NA                     | NA                                                            | NA                                                                                                | NA                                 | NA            | NA                     | [36] |
| FR4                                              | 0.004                                               | 1900                  | 1369                                    | 0.3                                    | NA                   | 37              | NA                                     | NA        | NA                                | NA                     | NA                                                            | NA                                                                                                | NA                                 | NA            | NA                     | [41] |
| In vitro - PBS including THP-1 cells             | 1.4                                                 | 1000                  | 4200                                    | NA                                     | NA                   | NR              | NA                                     | NA        | 1.19·10 <sup>3</sup> <sub>5</sub> | 2.318·10 <sup>5</sup>  | $\alpha = 1.34 \cdot 10^{-7}$ m <sup>2</sup> ·s <sup>-1</sup> | NA                                                                                                | NA                                 | 0.53          | NA                     | [30] |
| In vitro CHO-K1 cell line in potassium phosphate | $\sigma(T) = 0.162 \cdot (1 + 0.02 \cdot (T - 20))$ | 1000                  | 4200                                    | 0.58                                   | NA                   | 20              | NA                                     | NA        | NR                                | NR                     | NA                                                            | NR                                                                                                | 42                                 | NR            | NR                     | [60] |

|                                                                                    | Calculation of V and E                                           | Calculation of T      |                                         |                                        |                      |            |                                        |           | Calculation of $\Omega$ |                        |                                                                                                                                   | Ablation parameters                                                                                                                                          |                                                                                          |               |                        |      |
|------------------------------------------------------------------------------------|------------------------------------------------------------------|-----------------------|-----------------------------------------|----------------------------------------|----------------------|------------|----------------------------------------|-----------|-------------------------|------------------------|-----------------------------------------------------------------------------------------------------------------------------------|--------------------------------------------------------------------------------------------------------------------------------------------------------------|------------------------------------------------------------------------------------------|---------------|------------------------|------|
| Name                                                                               | $\sigma$                                                         | $\rho$                | $c_p$ or $c_b$                          | k                                      | $Q_m$                | $T_{init}$ | $w_b$                                  | $T_{art}$ | A                       | $U_a$                  | Additional Details/<br>Parameters                                                                                                 | $E_{IRE(th)}$<br>( $V_{P(th)}$ , $t_{P(th)}$ ,<br>$N_{P(th)}$ , $\tau_{P(th)}$ ,<br>$f_{P(th)}$ )                                                            | $T_{th}$<br>(Exposure<br>duration)                                                       | $\Omega_{th}$ | CEM43°C<br>( $_{th}$ ) | Ref  |
|                                                                                    | [S·m <sup>-1</sup> ]                                             | [kg·m <sup>-3</sup> ] | [J·kg <sup>-1</sup> ·°C <sup>-1</sup> ] | [W·m <sup>-1</sup> ·°C <sup>-1</sup> ] | [W·m <sup>-3</sup> ] | [°C]       | [kg·m <sup>-3</sup> ·s <sup>-1</sup> ] | [°C]      | [s <sup>-1</sup> ]      | [J·mol <sup>-1</sup> ] |                                                                                                                                   | [V·m <sup>-1</sup> ]<br>([V], [s], [-],<br>[s], [Hz])                                                                                                        | [°C]<br>([s])                                                                            |               | [min]                  |      |
| electroporation buffer                                                             |                                                                  |                       |                                         |                                        |                      |            |                                        |           |                         |                        |                                                                                                                                   |                                                                                                                                                              |                                                                                          |               |                        |      |
| In vitro Fibroblasts cultured in agarose gel                                       | 1.82                                                             | NR                    | NR                                      | NR                                     | NR                   | NR         | NA                                     | NA        | NR                      | NR                     | NA                                                                                                                                | 803.21·10 <sup>2</sup><br>(NA, NA, NA, NA, NA)                                                                                                               | 53.3                                                                                     | NR            | NR                     | [75] |
| In vitro Glioblastoma cells (U251 malignant glioma cells) in 3D collagen scaffolds | NR                                                               | NR                    | NR                                      | NR                                     | NR                   | NR         | NA                                     | NA        | NR                      | NR                     | NA                                                                                                                                | 698·10 <sup>2</sup><br>{1mM NaCl, (450, 100·10 <sup>-6</sup> , 80, NA, 1)}<br><br>745·10 <sup>2</sup><br>{5mM NaCl, (450, 100·10 <sup>-6</sup> , 80, NA, 1)} | NR                                                                                       | NR            | NR                     | [73] |
| In vitro Hydrogel including Glioblastoma multiform                                 | 1.2                                                              | 997.8                 | 4181.8                                  | 0.6                                    | NA                   | 20         | NA                                     | NA        | NR                      | NR                     | NA                                                                                                                                | 428·10 <sup>2</sup><br>(450, 100·10 <sup>-6</sup> , 50, NA, 1)                                                                                               | NR                                                                                       | NR            | NR                     | [61] |
| In vitro Pancreatic tumor cell suspension + Collagen I hydrogels                   | $\sigma(T) = \sigma_{init} (1 + \xi \cdot (T - T_{init}))$       | 997.8                 | 4181.8                                  | 0.6                                    | NA                   | 22         | NA                                     | NA        | NR                      | NR                     | $\xi = 0.02 \cdot ^\circ C^{-1}$<br>$\sigma_{init} = 1.2 \text{ S} \cdot \text{m}^{-1}$                                           | 500·10 <sup>2</sup><br>{(300,450), 100·10 <sup>-6</sup> , 80, NA, 1}                                                                                         | 45                                                                                       | NR            | NR                     | [43] |
| In vitro Phantom including NIH3T-3 cell line                                       | 1.82                                                             | NTA                   | NTA                                     | NTA                                    | NTA                  | NTA        | NTA                                    | NTA       | NTA                     | NTA                    | NA                                                                                                                                | 1250·10 <sup>2</sup><br>(Assumption)                                                                                                                         | NTA                                                                                      | NTA           | NTA                    | [47] |
| Kidney (Healthy)                                                                   | $\sigma = \sigma_{init}$                                         | 1080                  | 3890                                    | 0.547                                  | 23889                | 37         | NR                                     | NR        | NR                      | NR                     | $\sigma_{init} = 0.15 \text{ S} \cdot \text{m}^{-1}$<br>$w_b \cdot c_b = 43062 \text{ W} \cdot \text{m}^{-3} \cdot ^\circ C^{-1}$ | 500·10 <sup>2</sup><br>(NR, NR, NR, NR, NR)                                                                                                                  | 43<br>(For prolonged exposures)<br><br>50<br>(Transition point for rapid thermal damage) | NR            | NR                     | [45] |
| Kidney (Healthy)                                                                   | $\sigma(T) = \sigma_{init} \cdot (1 + \xi \cdot (T - T_{init}))$ | 1080                  | 3890                                    | 0.547                                  | 23889                | 37         | NR                                     | NR        | NR                      | NR                     | $\sigma_{init} = 0.15 \text{ S} \cdot \text{m}^{-1}$<br>$\xi = 0.017 \cdot ^\circ C^{-1}$                                         | 500·10 <sup>2</sup><br>(NR, NR, NR, NR, NR)                                                                                                                  | 43<br>(For prolonged exposures)<br><br>50                                                | NR            | NR                     | [45] |



|                     | Calculation of V and E                                                                                                                         | Calculation of T      |                                         |                                        |                      |            |                                        |           | Calculation of $\Omega$ |                        |                                                                                                                                                                                                                                                                                                                                                          | Ablation parameters                                                                               |                                                                                                   |               |                        |          |
|---------------------|------------------------------------------------------------------------------------------------------------------------------------------------|-----------------------|-----------------------------------------|----------------------------------------|----------------------|------------|----------------------------------------|-----------|-------------------------|------------------------|----------------------------------------------------------------------------------------------------------------------------------------------------------------------------------------------------------------------------------------------------------------------------------------------------------------------------------------------------------|---------------------------------------------------------------------------------------------------|---------------------------------------------------------------------------------------------------|---------------|------------------------|----------|
| Name                | $\sigma$                                                                                                                                       | $\rho$                | $c_p$ or $c_b$                          | k                                      | $Q_m$                | $T_{init}$ | $w_b$                                  | $T_{art}$ | A                       | $U_a$                  | Additional Details/<br>Parameters                                                                                                                                                                                                                                                                                                                        | $E_{IRE(th)}$<br>( $V_{P(th)}$ , $t_{P(th)}$ ,<br>$N_{P(th)}$ , $\tau_{P(th)}$ ,<br>$f_{P(th)}$ ) | $T_{th}$<br>(Exposure<br>duration)                                                                | $\Omega_{th}$ | CEM43°C<br>( $_{th}$ ) | Ref      |
|                     | [S·m <sup>-1</sup> ]                                                                                                                           | [kg·m <sup>-3</sup> ] | [J·kg <sup>-1</sup> ·°C <sup>-1</sup> ] | [W·m <sup>-1</sup> ·°C <sup>-1</sup> ] | [W·m <sup>-3</sup> ] | [°C]       | [kg·m <sup>-3</sup> ·s <sup>-1</sup> ] | [°C]      | [s <sup>-1</sup> ]      | [J·mol <sup>-1</sup> ] |                                                                                                                                                                                                                                                                                                                                                          | [V·m <sup>-1</sup> ]<br>([V], [s], [-],<br>[s], [Hz])                                             | [°C]<br>([s])                                                                                     |               | [min]                  |          |
|                     |                                                                                                                                                |                       |                                         |                                        |                      |            |                                        |           |                         |                        | $w_b \cdot c_b = 43062$<br>W·m <sup>-3</sup> ·°C <sup>-1</sup>                                                                                                                                                                                                                                                                                           |                                                                                                   | (Transition point<br>for rapid thermal<br>damage)                                                 |               |                        |          |
| Kidney<br>(Healthy) | $\sigma(E) = \sigma_{init} + (\sigma_{max} - \sigma_{init}) \cdot \exp(-a_1 \cdot \exp(-a_2 \cdot E))$                                         | 1080                  | 3890                                    | 0.547                                  | 23889                | 37         | NR                                     | NR        | NR                      | NR                     | $\sigma_{init} = 0.15$<br>S·m <sup>-1</sup><br>$w_b \cdot c_b = 43062$<br>W·m <sup>-3</sup> ·°C <sup>-1</sup><br>$a_1 = -5 \cdot 10^{-6} \cdot (t \cdot 10^{-6})^2 + 0.004 \cdot (t \cdot 10^{-6}) + 2.803$<br>$a_2 = -7 \cdot 10^{-9} \cdot (t \cdot 10^{-6})^2 + 5 \cdot 10^{-6} \cdot (t \cdot 10^{-6}) + 0.002$<br>m·V <sup>-1</sup>                 | 500·10 <sup>2</sup><br>(NR, NR, NR,<br>NR, NR)                                                    | 43<br>(For prolonged<br>exposures)<br><br>50<br>(Transition point<br>for rapid thermal<br>damage) | NR            | NR                     | [45<br>] |
| Kidney<br>(Healthy) | $\sigma(E, T) = (\sigma_{init} + (\sigma_{max} - \sigma_{init}) \cdot \exp(a_1 \cdot \exp(a_2 \cdot E))) \cdot (1 + \xi \cdot (T - T_{init}))$ | 1080                  | 3890                                    | 0.547                                  | 23889                | 37         | NR                                     | NR        | NR                      | NR                     | $\sigma_{init} = 0.15$<br>S·m <sup>-1</sup><br>$\xi = 0.017$<br>°C <sup>-1</sup><br>$w_b \cdot c_b = 43062$<br>W·m <sup>-3</sup> ·°C <sup>-1</sup><br>$a_1 = -5 \cdot 10^{-6} \cdot (t \cdot 10^{-6})^2 + 0.004 \cdot (t \cdot 10^{-6}) + 2.803$<br>$a_2 = -7 \cdot 10^{-9} \cdot (t \cdot 10^{-6})^2 + 5 \cdot 10^{-6} \cdot (t \cdot 10^{-6}) + 0.002$ | 500·10 <sup>2</sup><br>(NR, NR, NR,<br>NR, NR)                                                    | 43<br>(For prolonged<br>exposures)<br><br>50<br>(Transition point<br>for rapid thermal<br>damage) | NR            | NR                     | [45<br>] |
| Kidney<br>(Healthy) | $\sigma = \sigma_{init}$                                                                                                                       | NR                    | NR                                      | NR                                     | NR                   | NR         | NR                                     | NR        | NR                      | NR                     | $\sigma_{init} = 0.353$ S·m <sup>-1</sup>                                                                                                                                                                                                                                                                                                                | 501·10 <sup>2</sup><br>(1250, 1750,<br>2250),<br>100·10 <sup>-6</sup> , 100,<br>NA, 1)            | NR                                                                                                | NR            | NR                     | [63<br>] |

|                      | Calculation of V and E                                                                                                                                                                                                                | Calculation of T      |                                         |                                        |                      |            |                                        |           | Calculation of $\Omega$ |                        |                                                                                                                                                                                                                                                                     | Ablation parameters                                                                               |                                    |               |                        |      |
|----------------------|---------------------------------------------------------------------------------------------------------------------------------------------------------------------------------------------------------------------------------------|-----------------------|-----------------------------------------|----------------------------------------|----------------------|------------|----------------------------------------|-----------|-------------------------|------------------------|---------------------------------------------------------------------------------------------------------------------------------------------------------------------------------------------------------------------------------------------------------------------|---------------------------------------------------------------------------------------------------|------------------------------------|---------------|------------------------|------|
| Name                 | $\sigma$                                                                                                                                                                                                                              | $\rho$                | $c_p$ or $c_b$                          | k                                      | $Q_m$                | $T_{init}$ | $w_b$                                  | $T_{art}$ | A                       | $U_a$                  | Additional Details/<br>Parameters                                                                                                                                                                                                                                   | $E_{IRE(th)}$<br>( $V_{P(th)}$ , $t_{P(th)}$ ,<br>$N_{P(th)}$ , $\tau_{P(th)}$ ,<br>$f_{P(th)}$ ) | $T_{th}$<br>(Exposure<br>duration) | $\Omega_{th}$ | CEM43°C<br>( $_{th}$ ) | Ref  |
|                      | [S·m <sup>-1</sup> ]                                                                                                                                                                                                                  | [kg·m <sup>-3</sup> ] | [J·kg <sup>-1</sup> ·°C <sup>-1</sup> ] | [W·m <sup>-1</sup> ·°C <sup>-1</sup> ] | [W·m <sup>-3</sup> ] | [°C]       | [kg·m <sup>-3</sup> ·s <sup>-1</sup> ] | [°C]      | [s <sup>-1</sup> ]      | [J·mol <sup>-1</sup> ] |                                                                                                                                                                                                                                                                     | [V·m <sup>-1</sup> ]<br>([V], [s], [-],<br>[s], [Hz])                                             | [°C]<br>([s])                      |               | [min]                  |      |
| Kidney<br>(Healthy)  | $\sigma(E) = (\sigma_{max} - \sigma_{init}) \cdot (E - a_1) / (a_2 - a_1) + \sigma_{init}$                                                                                                                                            | NR                    | NR                                      | NR                                     | NR                   | NR         | NR                                     | NR        | NR                      | NR                     | $\sigma_{init} = 0.353 \text{ S} \cdot \text{m}^{-1}$<br>$\sigma_{max} = 1.195 \text{ S} \cdot \text{m}^{-1}$<br>$a_1 = 200 \cdot 10^2 \text{ V} \cdot \text{m}^{-1}$<br>$a_2 = 2000 \cdot 10^2 \text{ V} \cdot \text{m}^{-1}$                                      | $638 \cdot 10^2$<br>({1250, 1750, 2250},<br>$100 \cdot 10^{-6}$ , 100, NA, 1)                     | NR                                 | NR            | NR                     | [63] |
| Kidney<br>(Healthy)  | $\sigma(E) = \sigma_{init} + (\sigma_{max} - \sigma_{init}) \cdot \exp(a_3 \cdot \exp(a_4 \cdot E))$                                                                                                                                  | NR                    | NR                                      | NR                                     | NR                   | NR         | NR                                     | NR        | NR                      | NR                     | $\sigma_{init} = 0.353 \text{ S} \cdot \text{m}^{-1}$<br>$\sigma_{max} = 0.988 \text{ S} \cdot \text{m}^{-1}$<br>$a_3 = -3.053$<br>$a_4 = -0.00233 \cdot 10^{-2} \text{ m} \cdot \text{V}^{-1}$                                                                     | $575 \cdot 10^2$<br>({1250, 1750, 2250},<br>$100 \cdot 10^{-6}$ , 100, NA, 1)                     | NR                                 | NR            | NR                     | [63] |
| Kidney<br>(Healthy)  | 1                                                                                                                                                                                                                                     | NTA                   | NTA                                     | NTA                                    | NTA                  | NTA        | NTA                                    | NTA       | NR                      | NR                     | NA                                                                                                                                                                                                                                                                  | $600 \cdot 10^2$<br>(NR, NR, NR, NR, NR)                                                          | NR                                 | NR            | NR                     | [65] |
| Liver<br>(Cancerous) | 0.411                                                                                                                                                                                                                                 | 1050                  | 3600                                    | 0.512                                  | 33800                | 37         | 1                                      | 37        | NR                      | NR                     | NA                                                                                                                                                                                                                                                                  | $680 \cdot 10^2$<br>(3000,<br>$100 \cdot 10^{-6}$ , 8, 1, NA)                                     | {43, 50}<br>(NR)                   | NR            | NR                     | [39] |
| Liver<br>(Cancerous) | $\sigma_{pulse1}(t) = S_t(t) + \sigma_{init}$<br><br>$\sigma_{off} = \max(\sigma_{init}, \sigma_{pulse1}(t_{P1}) \cdot (0.64 - 0.017 \cdot \ln(t - t_{P1})))$<br><br>$\sigma_{pulse2}(t) = \min(\sigma_{max}, S_t(t) + \sigma_{off})$ | NR                    | NR                                      | NR                                     | NR                   | NTA        | NR                                     | NTA       | NR                      | NR                     | $\sigma_{init} = 0.135 \text{ S} \cdot \text{m}^{-1}$<br>$\sigma_{max} = 0.426 \text{ S} \cdot \text{m}^{-1}$<br>$t_{P1} = 25 \cdot 10^{-6} \text{ s}$<br>$t_{P2} = 100 \cdot 10^{-6} \text{ s}$<br>$S_t(t) = 0.291 \cdot \exp(-\exp(-0.0012 \cdot (E(t) - 1500)))$ | $700 \cdot 10^2$<br>(NR, NR, NR, NR, NR)                                                          | NR                                 | NR            | NR                     | [46] |
| Liver<br>(Cancerous) | NR                                                                                                                                                                                                                                    | 1079                  | 3540                                    | 0.52                                   | 10740                | 37         | NA                                     | NA        | $2.984 \cdot 10^{80}$   | $5.06 \cdot 10^5$      | $\dot{R} = 8.314 \text{ J} \cdot \text{mol}^{-1} \cdot \text{K}^{-1}$<br>$\xi = 0.015 \text{ } ^\circ\text{C}^{-1}$<br>$\sigma_{init} = 0.4 \text{ S} \cdot \text{m}^{-1}$                                                                                          | $800 \cdot 10^2$<br>(NR, NR, NR, NR, NR)                                                          | 50<br>(NR)                         | 1             | NR                     | [62] |

|                      | Calculation of V and E                                                                                      | Calculation of T      |                                         |                                        |                      |            |                                        |           | Calculation of $\Omega$ |                        |                                                                                                                                                                                                                                    | Ablation parameters                                                                               |                                                                  |               |                        |          |
|----------------------|-------------------------------------------------------------------------------------------------------------|-----------------------|-----------------------------------------|----------------------------------------|----------------------|------------|----------------------------------------|-----------|-------------------------|------------------------|------------------------------------------------------------------------------------------------------------------------------------------------------------------------------------------------------------------------------------|---------------------------------------------------------------------------------------------------|------------------------------------------------------------------|---------------|------------------------|----------|
| Name                 | $\sigma$                                                                                                    | $\rho$                | $c_p$ or $c_b$                          | k                                      | $Q_m$                | $T_{init}$ | $w_b$                                  | $T_{art}$ | A                       | $U_a$                  | Additional Details/<br>Parameters                                                                                                                                                                                                  | $E_{IRE(th)}$<br>( $V_{P(th)}$ , $t_{P(th)}$ ,<br>$N_{P(th)}$ , $\tau_{P(th)}$ ,<br>$f_{P(th)}$ ) | $T_{th}$<br>(Exposure<br>duration)                               | $\Omega_{th}$ | CEM43°C<br>( $_{th}$ ) | Ref      |
|                      | [S·m <sup>-1</sup> ]                                                                                        | [kg·m <sup>-3</sup> ] | [J·kg <sup>-1</sup> ·°C <sup>-1</sup> ] | [W·m <sup>-1</sup> ·°C <sup>-1</sup> ] | [W·m <sup>-3</sup> ] | [°C]       | [kg·m <sup>-3</sup> ·s <sup>-1</sup> ] | [°C]      | [s <sup>-1</sup> ]      | [J·mol <sup>-1</sup> ] |                                                                                                                                                                                                                                    | [V·m <sup>-1</sup> ]<br>([V], [s], [-],<br>[s], [Hz])                                             | [°C]<br>([s])                                                    |               | [min]                  |          |
|                      |                                                                                                             |                       |                                         |                                        |                      |            |                                        |           |                         |                        | $\sigma_{max} = 1.6$<br>S·m <sup>-1</sup>                                                                                                                                                                                          |                                                                                                   |                                                                  |               |                        |          |
| Liver<br>(Cancerous) | $\sigma(E) = \sigma_{init} + (\sigma_{max} - \sigma_{init}) \cdot 1 / (1 + \exp(-(E - a_2)/a_3))$           | NR                    | NR                                      | NR                                     | NR                   | NR         | NR                                     | NR        | NR                      | NR                     | $\sigma_{init} = 0.2$<br>S·m <sup>-1</sup><br>$\sigma_{max} = 0.5$<br>S·m <sup>-1</sup><br>$a_2 = 950 \cdot 10^2$<br>V·m <sup>-1</sup><br>$a_3 = 200 \cdot 10^2$<br>V·m <sup>-1</sup>                                              | 700·10 <sup>2</sup><br>(NR, NR, NR,<br>NR, NR)                                                    | NR                                                               | NR            | NR                     | [71<br>] |
| Liver<br>(Cancerous) | $\sigma(E) = \sigma_{init} + (\sigma_{max} - \sigma_{init}) \cdot 1 / (E - a_1)$                            | NR                    | NR                                      | NR                                     | NR                   | NR         | NR                                     | NR        | NR                      | NR                     | $\sigma_{init} = 0.1$<br>S·m <sup>-1</sup><br>$\sigma_{max} = 0.3$<br>S·m <sup>-1</sup><br>$a_1 = 500 \cdot 10^2$<br>V·m <sup>-1</sup>                                                                                             | [1500·10 <sup>2</sup> ,<br>1700·10 <sup>2</sup> ]<br>(NR, 100·10 <sup>-6</sup> ,<br>70, NA, ~1)   | NR                                                               | NR            | NR                     | [77<br>] |
| Liver<br>(Healthy)   | 0.286                                                                                                       | 1050                  | 3600                                    | 0.512                                  | 33800                | 37         | NA                                     | NA        | NR                      | NR                     | $\xi = 0.015$<br>°C <sup>-1</sup><br>(For $\sigma$ )<br><br>$\xi = 0.0025$<br>°C <sup>-1</sup><br>(For k)                                                                                                                          | 680·10 <sup>2</sup><br>{952,960},<br>100·10 <sup>-6</sup> , 8,<br>NA, 1Hz)                        | 50<br>(Instantaneous)<br><br>42 (Several<br>seconds to<br>hours) | 0.53          | NA                     | [3]      |
| Liver<br>(Healthy)   | 0.05                                                                                                        | 1050                  | 3600                                    | NR                                     | NR                   | 37         | NA                                     | NA        | NR                      | NR                     | NA                                                                                                                                                                                                                                 | [300·10 <sup>2</sup> ,<br>500·10 <sup>2</sup> ]<br>(Assumption)                                   | 50<br>(Instantaneous)                                            | NR            | NR                     | [24<br>] |
| Liver<br>(Healthy)   | $\sigma(E, T) = \sigma_{init} \cdot (1 + \text{flc2hs}(E - E_{alt}, E_{range}) + \xi \cdot (T - T_{init}))$ | 1050                  | 3600                                    | 0.512                                  | NR                   | 21         | NA                                     | NA        | NR                      | NR                     | $\sigma_{init} = 0.067$ S·m <sup>-1</sup><br>$\sigma_{max} = 0.241$ S·m <sup>-1</sup><br>$E_{alt} = 580 \cdot 10^2$<br>V·m <sup>-1</sup><br>$E_{range} = \pm 120 \cdot 10^2$<br>V·m <sup>-1</sup><br>$\xi = 0.015$ C <sup>-1</sup> | 423·10 <sup>2</sup><br>(1500,<br>100·10 <sup>-6</sup> , 99,<br>NA, 4)                             | NR                                                               | NR            | NR                     | [37<br>] |
| Liver<br>(Healthy)   | 0.125                                                                                                       | NTA                   | NTA                                     | NTA                                    | NTA                  | NTA        | NTA                                    | NTA       | NR                      | NR                     | NA                                                                                                                                                                                                                                 | 680·10 <sup>2</sup><br>(NR, NR, NR,<br>NR, NR)                                                    | NR                                                               | NR            | NR                     | [38<br>] |

|                    | Calculation of V and E                                                                                                                                                                                                           | Calculation of T      |                                         |                                        |                      |            |                                        |           | Calculation of $\Omega$           |                        |                                                                                                                                                                                                                                                                                                                                                  | Ablation parameters                                                                               |                                                          |                                        |                        |      |
|--------------------|----------------------------------------------------------------------------------------------------------------------------------------------------------------------------------------------------------------------------------|-----------------------|-----------------------------------------|----------------------------------------|----------------------|------------|----------------------------------------|-----------|-----------------------------------|------------------------|--------------------------------------------------------------------------------------------------------------------------------------------------------------------------------------------------------------------------------------------------------------------------------------------------------------------------------------------------|---------------------------------------------------------------------------------------------------|----------------------------------------------------------|----------------------------------------|------------------------|------|
| Name               | $\sigma$                                                                                                                                                                                                                         | $\rho$                | $c_p$ or $c_b$                          | k                                      | $Q_m$                | $T_{init}$ | $w_b$                                  | $T_{art}$ | A                                 | $U_a$                  | Additional Details/<br>Parameters                                                                                                                                                                                                                                                                                                                | $E_{IRE(th)}$<br>( $V_{P(th)}$ , $t_{P(th)}$ ,<br>$N_{P(th)}$ , $\tau_{P(th)}$ ,<br>$f_{P(th)}$ ) | $T_{th}$<br>(Exposure<br>duration)                       | $\Omega_{th}$                          | CEM43°C<br>( $_{th}$ ) | Ref  |
|                    | [S·m <sup>-1</sup> ]                                                                                                                                                                                                             | [kg·m <sup>-3</sup> ] | [J·kg <sup>-1</sup> ·°C <sup>-1</sup> ] | [W·m <sup>-1</sup> ·°C <sup>-1</sup> ] | [W·m <sup>-3</sup> ] | [°C]       | [kg·m <sup>-3</sup> ·s <sup>-1</sup> ] | [°C]      | [s <sup>-1</sup> ]                | [J·mol <sup>-1</sup> ] |                                                                                                                                                                                                                                                                                                                                                  | [V·m <sup>-1</sup> ]<br>([V], [s], [-],<br>[s], [Hz])                                             | [°C]<br>([s])                                            |                                        | [min]                  |      |
| Liver<br>(Healthy) | 0.075                                                                                                                                                                                                                            | 1050                  | 3600                                    | 0.512                                  | 33800                | 37         | 1                                      | 37        | NR                                | NR                     | NA                                                                                                                                                                                                                                                                                                                                               | NR                                                                                                | {43, 50}<br>(NR)                                         | NR                                     | NR                     | [39] |
| Liver<br>(Healthy) | $\sigma_{pulse1}(t) = S(t) + \sigma_{init}$<br><br>$\sigma_{off} = \max(\sigma_{init}, \sigma_{pulse1}(t_{p1}) \cdot (0.28 - 0.03 \cdot \ln(t - t_{p1})))$<br><br>$\sigma_{pulse2}(t) = \min(\sigma_{max}, S(t) + \sigma_{off})$ | NR                    | NR                                      | NR                                     | NR                   | NTA        | NR                                     | NTA       | NR                                | NR                     | $\sigma_{init} = 0.067 \text{ S} \cdot \text{m}^{-1}$<br>$\sigma_{max} = 0.241 \text{ S} \cdot \text{m}^{-1}$<br>$t_{p1} = 100 \cdot 10^{-6} \text{ s}$<br>$t_{p2} = 100 \cdot 10^{-6} \text{ s}$<br>$S(t) = (\sigma_{max} - \sigma_{init}) / (1 + 10 \cdot \exp(-1 \cdot 10^2 \cdot (E(t) - a_1) / a_2))$                                       | 700·10 <sup>2</sup><br>(NR, NR, NR, NR, NR)                                                       | NR                                                       | NR                                     | NR                     | [46] |
| Liver<br>(Healthy) | 0.286                                                                                                                                                                                                                            | 1050                  | 3600                                    | 0.512                                  | NR                   | 37.2       | NA                                     | NA        | NR                                | NR                     | $h = 10 \text{ W m}^{-2} \text{ °C}^{-1}$<br>$T_{env} = 25 \text{ °C}$                                                                                                                                                                                                                                                                           | 213·10 <sup>2</sup><br>(500, 50·10 <sup>-6</sup> , 200, NA, 1)                                    | 50<br>(for at least 3 minutes)                           | NR                                     | NR                     | [48] |
| Liver<br>(Healthy) | $\sigma(E) = \sigma_{init} + (\sigma_{max} - \sigma_{init}) / (1 + a_1 \cdot \exp(-(E - a_2) / a_3))$<br><br>$a_2 = (E_{IRE(th)} + E_{RE(th)}) / 2$<br><br>$a_3 = (E_{IRE(th)} - E_{RE(th)}) / a_4$                              | 1060                  | 3600                                    | 0.502                                  | NA                   | NR         | NA                                     | NA        | 7.39·10 <sup>3</sup> <sub>9</sub> | 2.577·10 <sup>5</sup>  | $\dot{R} = 8.314 \text{ J} \cdot \text{mol}^{-1} \cdot \text{K}^{-1}$<br>$a_1 = 10$<br>$a_4 = 8$<br>$E_{RE(th)} = 460 \cdot 10^2 \text{ V} \cdot \text{m}^{-1}$<br>$E_{IRE(th)} = 700 \cdot 10^2 \text{ V} \cdot \text{m}^{-1}$<br>$\sigma_{init} = 0.067 \text{ S} \cdot \text{m}^{-1}$<br>$\sigma_{max} = 0.241 \text{ S} \cdot \text{m}^{-1}$ | 700·10 <sup>2</sup><br>(NR, 100·10 <sup>-6</sup> , 8, NA, 1)                                      | 42<br>(Extended exposure)<br><br>73.4<br>(Instantaneous) | 4.6<br>(99% probability of cell death) | NA                     | [53] |
| Liver<br>(Healthy) | NR                                                                                                                                                                                                                               | 1079                  | 3540                                    | 0.52                                   | 10740                | 37         | NA                                     | NA        | 2.984·10 <sup>80</sup>            | 5.06·10 <sup>5</sup>   | $\dot{R} = 8.314 \text{ J} \cdot \text{mol}^{-1} \cdot \text{K}^{-1}$<br>$\xi = 0.015 \text{ °C}^{-1}$<br>$\sigma_{init} = 0.091 \text{ S} \cdot \text{m}^{-1}$<br>$\sigma_{max} = 0.45 \text{ S} \cdot \text{m}^{-1}$                                                                                                                           | 700·10 <sup>2</sup><br>(NR, NR, NR, NR, NR)                                                       | 50<br>(NR)                                               | 1                                      | NR                     | [62] |
| Liver<br>(Healthy) | $\sigma(E) = \sigma_{init} + (\sigma_{max} - \sigma_{init}) \cdot 1 / (1 + \exp(-(E - a_2) / a_3))$                                                                                                                              | NR                    | NR                                      | NR                                     | NR                   | NR         | NR                                     | NR        | NR                                | NR                     | $\sigma_{init} = 0.05 \text{ S} \cdot \text{m}^{-1}$<br>$\sigma_{max} = 0.3 \text{ S} \cdot \text{m}^{-1}$                                                                                                                                                                                                                                       | 700·10 <sup>2</sup><br>(NR, NR, NR, NR, NR)                                                       | NR                                                       | NR                                     | NR                     | [71] |

|                    | Calculation of V and E                                                                                                                               | Calculation of T      |                                         |                                        |                      |            |                                        |           | Calculation of $\Omega$   |                           |                                                                                                                                                                                                                                                                                                                  | Ablation parameters                                                                               |                                    |               |                        |          |
|--------------------|------------------------------------------------------------------------------------------------------------------------------------------------------|-----------------------|-----------------------------------------|----------------------------------------|----------------------|------------|----------------------------------------|-----------|---------------------------|---------------------------|------------------------------------------------------------------------------------------------------------------------------------------------------------------------------------------------------------------------------------------------------------------------------------------------------------------|---------------------------------------------------------------------------------------------------|------------------------------------|---------------|------------------------|----------|
| Name               | $\sigma$                                                                                                                                             | $\rho$                | $c_p$ or $c_b$                          | k                                      | $Q_m$                | $T_{init}$ | $w_b$                                  | $T_{art}$ | A                         | $U_a$                     | Additional Details/<br>Parameters                                                                                                                                                                                                                                                                                | $E_{IRE(th)}$<br>( $V_{P(th)}$ , $t_{P(th)}$ ,<br>$N_{P(th)}$ , $\tau_{P(th)}$ ,<br>$f_{P(th)}$ ) | $T_{th}$<br>(Exposure<br>duration) | $\Omega_{th}$ | CEM43°C<br>( $_{th}$ ) | Ref      |
|                    | [S·m <sup>-1</sup> ]                                                                                                                                 | [kg·m <sup>-3</sup> ] | [J·kg <sup>-1</sup> ·°C <sup>-1</sup> ] | [W·m <sup>-1</sup> ·°C <sup>-1</sup> ] | [W·m <sup>-3</sup> ] | [°C]       | [kg·m <sup>-3</sup> ·s <sup>-1</sup> ] | [°C]      | [s <sup>-1</sup> ]        | [J·mol <sup>-1</sup> ]    |                                                                                                                                                                                                                                                                                                                  | [V·m <sup>-1</sup> ]<br>([V], [s], [-],<br>[s], [Hz])                                             | [°C]<br>([s])                      |               | [min]                  |          |
|                    |                                                                                                                                                      |                       |                                         |                                        |                      |            |                                        |           |                           |                           | $a_2 = 950 \cdot 10^2$<br>V·m <sup>-1</sup><br>$a_3 = 200 \cdot 10^2$<br>V·m <sup>-1</sup><br>NA                                                                                                                                                                                                                 |                                                                                                   |                                    |               |                        |          |
| Liver<br>(Healthy) | 0.124                                                                                                                                                | NR                    | NR                                      | NR                                     | NR                   | NTA        | NR                                     | NTA       | NR                        | NR                        | $\varepsilon_r = 42672$                                                                                                                                                                                                                                                                                          | NR                                                                                                | NR                                 | NR            | NR                     | [72<br>] |
| Liver<br>(Healthy) | 0.047666                                                                                                                                             | NR                    | NR                                      | NR                                     | NR                   | NA         | NR                                     | NA        | NR                        | NR                        |                                                                                                                                                                                                                                                                                                                  | NR                                                                                                | NR                                 | NR            | NR                     | [74<br>] |
| Liver<br>(Healthy) | $\sigma(E, T) = (\sigma_{init} + (\sigma_{max} - \sigma_{init}) / (1 + 10 \cdot \exp(-(E - 58 \cdot 10^3) / (3 \cdot 10^3)))) \cdot 1.02^{(T - 37)}$ | 1080                  | 3455                                    | 0.502                                  | 0                    | 37         | NA                                     | NA        | NR                        | NR                        | $\sigma_{init} = 0.08$<br>S·m <sup>-1</sup><br>$\sigma_{max} = 0.31$<br>S·m <sup>-1</sup>                                                                                                                                                                                                                        | 500·10 <sup>2</sup><br>(NR, 100·10 <sup>-6</sup> ,<br>100, NA, 1)                                 | NR                                 | NR            | 340                    | [76<br>] |
| Liver<br>(Healthy) | $\sigma(E) = \sigma_{init} + (\sigma_{max} - \sigma_{init}) \cdot 1 / (E - a_1)$                                                                     | NR                    | NR                                      | NR                                     | NR                   | NR         | NR                                     | NR        | NR                        | NR                        | $\sigma_{init} = 0.1$<br>S·m <sup>-1</sup><br>$\sigma_{max} = 0.3$<br>S·m <sup>-1</sup><br>$a_1 = 500 \cdot 10^2$<br>V·m <sup>-1</sup>                                                                                                                                                                           | [1500·10 <sup>2</sup> ,<br>1700·10 <sup>2</sup> ]<br>(NR, 100·10 <sup>-6</sup> ,<br>70, NA, ~1)   | NR                                 | NR            | NR                     | [77<br>] |
| Liver<br>(Healthy) | $\sigma(E) = \sigma_{init} \cdot (1 + 0.5 \cdot a_1 (1 + \tanh((E - E_{RE(th)}) / E_{RE(th)})))$                                                     | NR                    | NR                                      | NR                                     | NR                   | NR         | NR                                     | NR        | NR                        | NR                        | $\sigma_{init} = 0.12$<br>S·m <sup>-1</sup><br>$a_1 = 3$<br>$E_{RE(th)} = 300 \cdot 10^2$<br>V·m <sup>-1</sup>                                                                                                                                                                                                   | 650·10 <sup>2</sup><br>(NR, NR, NR,<br>NR, NR)                                                    | NR                                 | NR            | NR                     | [79<br>] |
| Liver<br>(Healthy) | $\sigma(E, T) = (\sigma_{init} + (\sigma_{max} - \sigma_{init}) / (1 + a_1 \cdot \exp(-(E - a_2) / a_3))) \cdot (1 + \xi \cdot (T - T_{init}))$      | 1079                  | 3540                                    | 0.52                                   | NR                   | 26         | NR                                     | NR        | 7.39·10 <sup>3</sup><br>9 | 2.577·<br>10 <sup>5</sup> | $\xi = 0.02$ °C <sup>-1</sup><br>$\omega_b = \{1.43 \cdot 10^{-3} \text{ s}^{-1}, 3.575 \cdot 10^{-3} \text{ s}^{-1}, 7.15 \cdot 10^{-3} \text{ s}^{-1}\}$<br>$a_1 = 10, a_2 = (E_{RE(th)} + E_{IRE(th)}) / 2,$<br>$a_3 = (E_{IRE(th)} - E_{RE(th)}) / 2,$<br>$E_{RE(th)} = 460 \cdot 10^2$<br>V·m <sup>-1</sup> | 700·10 <sup>2</sup><br>(NR, NR, NR,<br>NR, NR)                                                    | 70                                 | NR            | NR                     | [80<br>] |

|                                               | Calculation of V and E                                                                                                                 | Calculation of T      |                                         |                                        |                      |            |                                        |           | Calculation of $\Omega$ |                        |                                                                                                                                                                        | Ablation parameters                                                                               |                                    |               |                        |      |
|-----------------------------------------------|----------------------------------------------------------------------------------------------------------------------------------------|-----------------------|-----------------------------------------|----------------------------------------|----------------------|------------|----------------------------------------|-----------|-------------------------|------------------------|------------------------------------------------------------------------------------------------------------------------------------------------------------------------|---------------------------------------------------------------------------------------------------|------------------------------------|---------------|------------------------|------|
| Name                                          | $\sigma$                                                                                                                               | $\rho$                | $c_p$ or $c_b$                          | k                                      | $Q_m$                | $T_{init}$ | $w_b$                                  | $T_{art}$ | A                       | $U_a$                  | Additional Details/<br>Parameters                                                                                                                                      | $E_{IRE(th)}$<br>( $V_{P(th)}$ , $t_{P(th)}$ ,<br>$N_{P(th)}$ , $\tau_{P(th)}$ ,<br>$f_{P(th)}$ ) | $T_{th}$<br>(Exposure<br>duration) | $\Omega_{th}$ | CEM43°C<br>( $_{th}$ ) | Ref  |
|                                               | [S·m <sup>-1</sup> ]                                                                                                                   | [kg·m <sup>-3</sup> ] | [J·kg <sup>-1</sup> ·°C <sup>-1</sup> ] | [W·m <sup>-1</sup> ·°C <sup>-1</sup> ] | [W·m <sup>-3</sup> ] | [°C]       | [kg·m <sup>-3</sup> ·s <sup>-1</sup> ] | [°C]      | [s <sup>-1</sup> ]      | [J·mol <sup>-1</sup> ] |                                                                                                                                                                        | [V·m <sup>-1</sup> ]<br>([V], [s], [-],<br>[s], [Hz])                                             | [°C]<br>([s])                      |               | [min]                  |      |
|                                               |                                                                                                                                        |                       |                                         |                                        |                      |            |                                        |           |                         |                        | $E_{IRE(th)} = 700 \cdot 10^2$<br>V·m <sup>-1</sup><br>$\sigma_{init} = 0.12$<br>S·m <sup>-1</sup><br>$\sigma_{max} = 0.42$<br>S·m <sup>-1</sup>                       |                                                                                                   |                                    |               |                        |      |
| Liver (Healthy, Parenchymal)                  | { $\sigma = 0.02$ S·m <sup>-1</sup>   E = 0 V·m <sup>-1</sup> }<br><br>{ $\sigma = 0.13$ S·m <sup>-1</sup>   E ≠ 0 V·m <sup>-1</sup> } | NTA                   | NTA                                     | NTA                                    | NTA                  | NTA        | NTA                                    | NTA       | NTA                     | NTA                    | NA                                                                                                                                                                     | NR                                                                                                | NTA                                | NTA           | NTA                    | [54] |
| Muscle (Healthy)                              | 0.2                                                                                                                                    | NR                    | NR                                      | NR                                     | NR                   | NR         | NR                                     | NR        | NR                      | NR                     | NA                                                                                                                                                                     | NR                                                                                                | NR                                 | NR            | NR                     | [67] |
| Muscle (Healthy, Anisotropic circumferential) | $\sigma(E) = \sigma_{init} \cdot (1 + \Lambda \cdot 2 \cdot \ln(2hs(E - E_{alt}, E_{range})))$                                         | 1000                  | 3750                                    | 0.5                                    | NA                   | 37         | NA                                     | NA        | 1.552·10 <sup>67</sup>  | 4.3·10 <sup>5</sup>    | $\sigma_{init} = 0.75$<br>S·m <sup>-1</sup><br>$\Lambda = 2.5$<br>$E_{alt} = 500 \cdot 10^2$<br>V·m <sup>-1</sup><br>$E_{range} = 300 \cdot 10^2$<br>V·m <sup>-1</sup> | 500·10 <sup>2</sup><br>(NR, NR, NR, NR, NR)                                                       | NR                                 | 0.53          | NR                     | [59] |
| Muscle (Healthy, Anisotropic longitudinal)    | $\sigma(E) = \sigma_{init} \cdot (1 + \Lambda \cdot 2 \cdot \ln(2hs(E - E_{alt}, E_{range})))$                                         | 1000                  | 3750                                    | 0.5                                    | NA                   | 37         | NA                                     | NA        | 1.552·10 <sup>67</sup>  | 4.3·10 <sup>5</sup>    | $\sigma_{init} = 0.135$ S·m <sup>-1</sup><br>$\Lambda = 2.5$<br>$E_{alt} = 500 \cdot 10^2$<br>V·m <sup>-1</sup><br>$E_{range} = 300 \cdot 10^2$<br>V·m <sup>-1</sup>   | 500·10 <sup>2</sup><br>(NR, NR, NR, NR, NR)                                                       | NR                                 | 0.53          | NR                     | [59] |
| Muscle (Healthy, Anisotropic parallel)        | 0.8                                                                                                                                    | NTA                   | NTA                                     | NTA                                    | NTA                  | NTA        | NTA                                    | NTA       | NR                      | NR                     | NA                                                                                                                                                                     | NR                                                                                                | NR                                 | NR            | NR                     | [35] |
| Muscle (Healthy, Anisotropic perpendicular)   | 0.055                                                                                                                                  | NTA                   | NTA                                     | NTA                                    | NTA                  | NTA        | NTA                                    | NTA       | NR                      | NR                     | NA                                                                                                                                                                     | NR                                                                                                | NR                                 | NR            | NR                     | [35] |
| ND tissue                                     | 0.2                                                                                                                                    | 1000                  | 4000                                    | 0.5                                    | NA                   | 37         | 0                                      | 37        | NA                      | NA                     | NA                                                                                                                                                                     | NR                                                                                                | NR                                 | NA            | NA                     | [27] |
| ND tissue                                     | 0.2                                                                                                                                    | 1000                  | 4200                                    | NA                                     | NA                   | NR         | NA                                     | NA        | 1.19·10 <sup>35</sup>   | 2.318·10 <sup>5</sup>  | $\alpha = 1.34 \cdot 10^{-7}$<br>m <sup>2</sup> ·s <sup>-1</sup>                                                                                                       | NA                                                                                                | NA                                 | 0.53          | NA                     | [30] |

|                     | Calculation of V and E                                                                                                                                                                                     | Calculation of T      |                                         |                                        |                      |            |                                        |           | Calculation of $\Omega$ |                        |                                                                                                                                                                                                                                                                                            | Ablation parameters                                                                               |                                                              |                                        |                        |      |
|---------------------|------------------------------------------------------------------------------------------------------------------------------------------------------------------------------------------------------------|-----------------------|-----------------------------------------|----------------------------------------|----------------------|------------|----------------------------------------|-----------|-------------------------|------------------------|--------------------------------------------------------------------------------------------------------------------------------------------------------------------------------------------------------------------------------------------------------------------------------------------|---------------------------------------------------------------------------------------------------|--------------------------------------------------------------|----------------------------------------|------------------------|------|
| Name                | $\sigma$                                                                                                                                                                                                   | $\rho$                | $c_p$ or $c_b$                          | k                                      | $Q_m$                | $T_{init}$ | $w_b$                                  | $T_{art}$ | A                       | $U_a$                  | Additional Details/<br>Parameters                                                                                                                                                                                                                                                          | $E_{IRE(th)}$<br>( $V_{P(th)}$ , $t_{P(th)}$ ,<br>$N_{P(th)}$ , $\tau_{P(th)}$ ,<br>$f_{P(th)}$ ) | $T_{th}$<br>(Exposure<br>duration)                           | $\Omega_{th}$                          | CEM43°C<br>( $_{th}$ ) | Ref  |
|                     | [S·m <sup>-1</sup> ]                                                                                                                                                                                       | [kg·m <sup>-3</sup> ] | [J·kg <sup>-1</sup> ·°C <sup>-1</sup> ] | [W·m <sup>-1</sup> ·°C <sup>-1</sup> ] | [W·m <sup>-3</sup> ] | [°C]       | [kg·m <sup>-3</sup> ·s <sup>-1</sup> ] | [°C]      | [s <sup>-1</sup> ]      | [J·mol <sup>-1</sup> ] |                                                                                                                                                                                                                                                                                            | [V·m <sup>-1</sup> ]<br>([V], [s], [-],<br>[s], [Hz])                                             | [°C]<br>([s])                                                |                                        | [min]                  |      |
| ND tissue           | NA                                                                                                                                                                                                         | NA                    | NA                                      | NA                                     | NA                   | NA         | NA                                     | NA        | $1.98 \cdot 10^{106}$   | $6.67 \cdot 10^5$      | NA                                                                                                                                                                                                                                                                                         | NA                                                                                                | NA                                                           | NA                                     | NA                     | [40] |
| ND tissue           | NA                                                                                                                                                                                                         | NA                    | NA                                      | NA                                     | NA                   | NA         | NA                                     | NA        | $7.39 \cdot 10^37$      | $2.577 \cdot 10^5$     | NA                                                                                                                                                                                                                                                                                         | NA                                                                                                | NA                                                           | NA                                     | NA                     | [40] |
| ND tissue (Healthy) | $\sigma(E) = (\sigma_{max} - \sigma_{init}) \cdot E / (E_{IRE(th)} - E_{RE(th)}) + \sigma_{init}$                                                                                                          | 1050                  | 3600                                    | 0.51                                   | 420                  | 37         | 4.664                                  | 37        | NR                      | NR                     | $\sigma_{init} = 0.1$<br>S·m <sup>-1</sup><br>$\sigma_{max} = 0.4$<br>S·m <sup>-1</sup><br>$E_{RE(th)} = 200 \cdot 10^2$<br>V·m <sup>-1</sup><br>$E_{IRE(th)} = 800 \cdot 10^2$<br>V·m <sup>-1</sup>                                                                                       | $800 \cdot 10^2$<br>(NR, NR, NR, NR, NR)                                                          | 50                                                           | NR                                     | NR                     | [42] |
| ND tissue (Healthy) | 0.286                                                                                                                                                                                                      | 1050                  | 3600                                    | 0.25                                   | NA                   | NR         | NA                                     | NA        | NR                      | NR                     | NA                                                                                                                                                                                                                                                                                         | $1000 \cdot 10^2$<br>(Assumption)                                                                 | NR                                                           | NR                                     | NR                     | [55] |
| ND tissue 1         | 0.2                                                                                                                                                                                                        | 1050                  | 3600                                    | 0.5                                    | NR                   | 37         | NR                                     | NR        | NR                      | NR                     | NA                                                                                                                                                                                                                                                                                         | $800 \cdot 10^2$<br>(Assumption)                                                                  | 50<br>(Instantaneous)<br><br>42<br>(Long period of exposure) | NR                                     | NR                     | [26] |
| ND tissue 1         | $\sigma(E) = 1.25 \cdot (\sigma_{init} + (\sigma_{max} - \sigma_{init}) / (1 + a_1 \cdot \exp(-(E - a_2)/a_3)))$<br><br>$a_2 = (E_{IRE(th)} + E_{RE(th)})/2$<br><br>$a_3 = (E_{IRE(th)} - E_{RE(th)})/a_4$ | 1060                  | 3600                                    | 0.502                                  | NA                   | NR         | NA                                     | NA        | $7.39 \cdot 10^39$      | $2.577 \cdot 10^5$     | $\dot{R} = 8.314$<br>J·mol <sup>-1</sup> ·K <sup>-1</sup><br>$a_1 = 10$<br>$a_4 = 8$<br>$E_{RE(th)} = 460 \cdot 10^2$<br>V·m <sup>-1</sup><br>$E_{IRE(th)} = 700 \cdot 10^2$<br>V·m <sup>-1</sup><br>$\sigma_{init} = 0.067$ S·m <sup>-1</sup><br>$\sigma_{max} = 0.241$ S·m <sup>-1</sup> | $700 \cdot 10^2$<br>(NR, $100 \cdot 10^{-6}$ , 8, NA, 1)                                          | 42<br>(Extended exposure)<br><br>73.4<br>(Instantaneous)     | 4.6<br>(99% probability of cell death) | NA                     | [53] |
| ND tissue 2         | 0.04                                                                                                                                                                                                       | NA                    | NA                                      | NA                                     | NA                   | NA         | NA                                     | NA        | NR                      | NR                     | NA                                                                                                                                                                                                                                                                                         | $800 \cdot 10^2$<br>(Assumption)                                                                  | 50<br>(Instantaneous)<br><br>42<br>(Long period of exposure) | NR                                     | NR                     | [26] |
| ND tissue 2         | $\sigma(E) = 1.5 \cdot (\sigma_{init} + (\sigma_{max} - \sigma_{init}) / (1 + a_1 \cdot \exp(-(E - a_2)/a_3)))$                                                                                            | 1060                  | 3600                                    | 0.502                                  | NA                   | NR         | NA                                     | NA        | $7.39 \cdot 10^39$      | $2.577 \cdot 10^5$     | $\dot{R} = 8.314$<br>J·mol <sup>-1</sup> ·K <sup>-1</sup><br>$a_1 = 10$                                                                                                                                                                                                                    | $700 \cdot 10^2$<br>(NR, $100 \cdot 10^{-6}$ , 8, NA, 1)                                          | 42<br>(Extended exposure)                                    | 4.6<br>(99% probabi                    | NA                     | [53] |

|                             | Calculation of V and E                                                                                                                                                                                     | Calculation of T      |                                         |                                        |                      |            |                                        |           | Calculation of $\Omega$           |                        |                                                                                                                                                                                                                                                                               | Ablation parameters                                                                               |                                                                                                   |                                                  |                        |          |
|-----------------------------|------------------------------------------------------------------------------------------------------------------------------------------------------------------------------------------------------------|-----------------------|-----------------------------------------|----------------------------------------|----------------------|------------|----------------------------------------|-----------|-----------------------------------|------------------------|-------------------------------------------------------------------------------------------------------------------------------------------------------------------------------------------------------------------------------------------------------------------------------|---------------------------------------------------------------------------------------------------|---------------------------------------------------------------------------------------------------|--------------------------------------------------|------------------------|----------|
| Name                        | $\sigma$                                                                                                                                                                                                   | $\rho$                | $c_p$ or $c_b$                          | k                                      | $Q_m$                | $T_{init}$ | $w_b$                                  | $T_{art}$ | A                                 | $U_a$                  | Additional Details/<br>Parameters                                                                                                                                                                                                                                             | $E_{IRE(th)}$<br>( $V_{P(th)}$ , $t_{P(th)}$ ,<br>$N_{P(th)}$ , $\tau_{P(th)}$ ,<br>$f_{P(th)}$ ) | $T_{th}$<br>(Exposure<br>duration)                                                                | $\Omega_{th}$                                    | CEM43°C<br>( $_{th}$ ) | Ref      |
|                             | [S·m <sup>-1</sup> ]                                                                                                                                                                                       | [kg·m <sup>-3</sup> ] | [J·kg <sup>-1</sup> ·°C <sup>-1</sup> ] | [W·m <sup>-1</sup> ·°C <sup>-1</sup> ] | [W·m <sup>-3</sup> ] | [°C]       | [kg·m <sup>-3</sup> ·s <sup>-1</sup> ] | [°C]      | [s <sup>-1</sup> ]                | [J·mol <sup>-1</sup> ] |                                                                                                                                                                                                                                                                               | [V·m <sup>-1</sup> ]<br>([V], [s], [-],<br>[s], [Hz])                                             | [°C]<br>([s])                                                                                     |                                                  | [min]                  |          |
|                             | $a_2 = (E_{IRE(th)} + E_{RE(th)})/2$<br><br>$a_3 = (E_{IRE(th)} - E_{RE(th)})/a_4$                                                                                                                         |                       |                                         |                                        |                      |            |                                        |           |                                   |                        | $a_4 = 8$<br>$E_{RE(th)} = 460 \cdot 10^2$<br>$V \cdot m^{-1}$<br>$E_{IRE(th)} = 700 \cdot 10^2$<br>$V \cdot m^{-1}$<br>$\sigma_{init} = 0.067 S \cdot m^{-1}$<br>$\sigma_{max} = 0.241 S \cdot m^{-1}$                                                                       |                                                                                                   | 73.4<br>(Instantaneous)                                                                           | lity of<br>cell<br>death)                        |                        |          |
| ND tissue 3                 | 1                                                                                                                                                                                                          | NA                    | NA                                      | NA                                     | NA                   | NA         | NA                                     | NA        | NR                                | NR                     | NA                                                                                                                                                                                                                                                                            | 800·10 <sup>2</sup><br>(Assumption)                                                               | 50<br>(Instantaneous)                                                                             | NR                                               | NR                     | [26<br>] |
| ND tissue 3                 | $\sigma(E) = 1.75 \cdot (\sigma_{init} + (\sigma_{max} - \sigma_{init}) / (1 + a_1 \cdot \exp(-(E - a_2)/a_3)))$<br><br>$a_2 = (E_{IRE(th)} + E_{RE(th)})/2$<br><br>$a_3 = (E_{IRE(th)} - E_{RE(th)})/a_4$ | 1060                  | 3600                                    | 0.502                                  | NA                   | NR         | NA                                     | NA        | 7.39·10 <sup>3</sup> <sub>9</sub> | 2.577·10 <sup>5</sup>  | $\dot{R} = 8.314$<br>$J \cdot mol^{-1} \cdot K^{-1}$<br>$a_1 = 10$<br>$a_4 = 8$<br>$E_{RE(th)} = 460 \cdot 10^2$<br>$V \cdot m^{-1}$<br>$E_{IRE(th)} = 700 \cdot 10^2$<br>$V \cdot m^{-1}$<br>$\sigma_{init} = 0.067 S \cdot m^{-1}$<br>$\sigma_{max} = 0.241 S \cdot m^{-1}$ | 700·10 <sup>2</sup><br>(NR, 100·10 <sup>-6</sup> ,<br>8, NA, 1)                                   | 42<br>(Long period of<br>exposure)<br>42<br>(Extended<br>exposure)<br><br>73.4<br>(Instantaneous) | 4.6<br>(99% probabi<br>lity of<br>cell<br>death) | NA                     | [53<br>] |
| Nerve - Myelin<br>(Healthy) | 3.45·10 <sup>-6</sup>                                                                                                                                                                                      | 1043                  | 3600                                    | 0.5                                    | NR                   | 37.08      | NA                                     | NA        | NR                                | NR                     | NA                                                                                                                                                                                                                                                                            | 1000·10 <sup>2</sup><br>(NR, NR, NR,<br>NR, NR)                                                   | NR                                                                                                | 1                                                | NR                     | [28<br>] |
| Nerve axon<br>(Healthy)     | 1.44                                                                                                                                                                                                       | 1043                  | 3600                                    | 0.5                                    | NR                   | 37.08      | NA                                     | NA        | NR                                | NR                     | NA                                                                                                                                                                                                                                                                            | 1000·10 <sup>2</sup><br>(NR, NR, NR,<br>NR, NR)                                                   | NR                                                                                                | 1                                                | NR                     | [28<br>] |
| Nerve axon<br>(Healthy)     | 1.44                                                                                                                                                                                                       | NR                    | NR                                      | NR                                     | NR                   | NR         | NR                                     | NR        | NR                                | NR                     | NA                                                                                                                                                                                                                                                                            | NR                                                                                                | NR                                                                                                | NR                                               | NR                     | [67<br>] |
| Pancreas<br>(Cancerous)     | $\sigma(E) = \sigma_{init} + (\sigma_{max} - \sigma_{init}) \cdot \exp(-\exp(a_6 \cdot (E - E_{IRE(th)})))$                                                                                                | 1087                  | 3164                                    | 0.51                                   | 12924.43             | 37         | 212                                    | 37        | NR                                | NR                     | $\sigma_{init} = 0.341 S \cdot m^{-1}$<br>$\sigma_{max} = 0.95 S \cdot m^{-1}$<br>$a_6 = 0.2 \cdot 10^{-2} m \cdot V^{-1}$                                                                                                                                                    | 500·10 <sup>2</sup><br>(300, 90·10 <sup>-6</sup> ,<br>100, NR, NR)                                | NR                                                                                                | NR                                               | NR                     | [70<br>] |



|                         | Calculation of V and E                                                                                      | Calculation of T      |                                         |                                        |                      |            |                                        |           | Calculation of $\Omega$ |                        |                                                                                                                                                                                         | Ablation parameters                                                                                                                            |                                    |               |                        |          |
|-------------------------|-------------------------------------------------------------------------------------------------------------|-----------------------|-----------------------------------------|----------------------------------------|----------------------|------------|----------------------------------------|-----------|-------------------------|------------------------|-----------------------------------------------------------------------------------------------------------------------------------------------------------------------------------------|------------------------------------------------------------------------------------------------------------------------------------------------|------------------------------------|---------------|------------------------|----------|
| Name                    | $\sigma$                                                                                                    | $\rho$                | $c_p$ or $c_b$                          | k                                      | $Q_m$                | $T_{init}$ | $w_b$                                  | $T_{art}$ | A                       | $U_a$                  | Additional Details/<br>Parameters                                                                                                                                                       | $E_{IRE(th)}$<br>( $V_{P(th)}$ , $t_{P(th)}$ ,<br>$N_{P(th)}$ , $\tau_{P(th)}$ ,<br>$f_{P(th)}$ )                                              | $T_{th}$<br>(Exposure<br>duration) | $\Omega_{th}$ | CEM43°C<br>( $_{th}$ ) | Ref      |
|                         | [S·m <sup>-1</sup> ]                                                                                        | [kg·m <sup>-3</sup> ] | [J·kg <sup>-1</sup> ·°C <sup>-1</sup> ] | [W·m <sup>-1</sup> ·°C <sup>-1</sup> ] | [W·m <sup>-3</sup> ] | [°C]       | [kg·m <sup>-3</sup> ·s <sup>-1</sup> ] | [°C]      | [s <sup>-1</sup> ]      | [J·mol <sup>-1</sup> ] |                                                                                                                                                                                         | [V·m <sup>-1</sup> ]<br>([V], [s], [-],<br>[s], [Hz])                                                                                          | [°C]<br>([s])                      |               | [min]                  |          |
|                         |                                                                                                             |                       |                                         |                                        |                      |            |                                        |           |                         |                        | $E_{IRE(th)} = 400 \cdot 10^2$<br>V·m <sup>-1</sup>                                                                                                                                     |                                                                                                                                                |                                    |               |                        |          |
| Pancreas<br>(Healthy)   | 0.5                                                                                                         | NTA                   | NTA                                     | NTA                                    | NTA                  | NTA        | NTA                                    | NTA       | NR                      | NR                     | NR                                                                                                                                                                                      | 650·10 <sup>2</sup><br>(NR, NR, NR,<br>NR, NR)                                                                                                 | NR                                 | NR            | NR                     | [52<br>] |
| Pancreas<br>(Healthy)   | $\sigma(E) = \sigma_{init} + (\sigma_{max} - \sigma_{init}) \cdot \exp(-\exp(a_6 \cdot (E - E_{IRE(th)})))$ | 1087                  | 3164                                    | 0.51                                   | 12924.43             | 37         | 212                                    | 37        | NR                      | NR                     | $\sigma_{init} = 0.341$ S·m <sup>-1</sup><br>$\sigma_{max} = 0.95$ S·m <sup>-1</sup><br>$a_6 = 0.2 \cdot 10^{-2}$ m·V <sup>-1</sup><br>$E_{IRE(th)} = 400 \cdot 10^2$ V·m <sup>-1</sup> | NR                                                                                                                                             | NR                                 | NR            | NR                     | [70<br>] |
| Prostate<br>(Cancerous) | NR                                                                                                          | NTA                   | NTA                                     | NTA                                    | NTA                  | NTA        | NTA                                    | NTA       | NTA                     | NTA                    | $\xi = [0.01, 0.03]$ °C <sup>-1</sup>                                                                                                                                                   | [668·10 <sup>2</sup> , 893·10 <sup>2</sup> ]<br>(500, {50·10 <sup>-6</sup> , 100·10 <sup>-6</sup> }, {10, 50, 99}, 10)                         | ~43 °C<br>(5 minutes)              | 0.53          | NTA                    | [50<br>] |
| Prostate<br>(Cancerous) | 0.3                                                                                                         | NR                    | NR                                      | NR                                     | NR                   | NR         | NR                                     | NR        | NR                      | NR                     | NA                                                                                                                                                                                      | 700·10 <sup>2</sup><br>{([1650, 2850], 90·10 <sup>-6</sup> , 70, NA, NR),<br>Multiple electrode pairs)                                         | NR                                 | NR            | NR                     | [67<br>] |
| Prostate<br>(Cancerous) | $\sigma = \sigma_{init}$                                                                                    | NR                    | NR                                      | NR                                     | NR                   | NR         | NR                                     | NR        | NR                      | NR                     | NA                                                                                                                                                                                      | 422·10 <sup>2</sup><br>{(NR, [70·10 <sup>-6</sup> , 90·10 <sup>-6</sup> ], 90, NA, NR), Static conductivity,<br>Multiple electrode pairs }     | NR                                 | NR            | NR                     | [68<br>] |
| Prostate<br>(Cancerous) | $\sigma(E)$<br>(No values mentioned, Plotted in figure)                                                     | NR                    | NR                                      | NR                                     | NR                   | NR         | NR                                     | NR        | NR                      | NR                     | $\sigma_{init} = 0.284$ S·m <sup>-1</sup><br>$\sigma_{max} = 0.72 \pm 0.15$ S·m <sup>-1</sup>                                                                                           | 506·10 <sup>2</sup><br>{(NR, [70·10 <sup>-6</sup> , 90·10 <sup>-6</sup> ], 90, NA, NR),<br>Dynamic conductivity,<br>Multiple electrode pairs } | NR                                 | NR            | NR                     | [68<br>] |

|                                 | Calculation of V and E                                                                                          | Calculation of T      |                                         |                                        |                      |            |                                        |           | Calculation of $\Omega$ |                        |                                                                                                                                                                                                                                                                                                                                            | Ablation parameters                                                                                                 |                                    |               |                        |          |
|---------------------------------|-----------------------------------------------------------------------------------------------------------------|-----------------------|-----------------------------------------|----------------------------------------|----------------------|------------|----------------------------------------|-----------|-------------------------|------------------------|--------------------------------------------------------------------------------------------------------------------------------------------------------------------------------------------------------------------------------------------------------------------------------------------------------------------------------------------|---------------------------------------------------------------------------------------------------------------------|------------------------------------|---------------|------------------------|----------|
| Name                            | $\sigma$                                                                                                        | $\rho$                | $c_p$ or $c_b$                          | k                                      | $Q_m$                | $T_{init}$ | $w_b$                                  | $T_{art}$ | A                       | $U_a$                  | Additional Details/<br>Parameters                                                                                                                                                                                                                                                                                                          | $E_{IRE(th)}$<br>( $V_{P(th)}$ , $t_{P(th)}$ ,<br>$N_{P(th)}$ , $\tau_{P(th)}$ ,<br>$f_{P(th)}$ )                   | $T_{th}$<br>(Exposure<br>duration) | $\Omega_{th}$ | CEM43°C<br>( $_{th}$ ) | Ref      |
|                                 | [S·m <sup>-1</sup> ]                                                                                            | [kg·m <sup>-3</sup> ] | [J·kg <sup>-1</sup> ·°C <sup>-1</sup> ] | [W·m <sup>-1</sup> ·°C <sup>-1</sup> ] | [W·m <sup>-3</sup> ] | [°C]       | [kg·m <sup>-3</sup> ·s <sup>-1</sup> ] | [°C]      | [s <sup>-1</sup> ]      | [J·mol <sup>-1</sup> ] |                                                                                                                                                                                                                                                                                                                                            | [V·m <sup>-1</sup> ]<br>([V], [s], [-],<br>[s], [Hz])                                                               | [°C]<br>([s])                      |               | [min]                  |          |
| Prostate<br>(Healthy)           | 0.42                                                                                                            | 1045                  | 3600                                    | 0.56                                   | NR                   | 37.08      | NA                                     | NA        | $3.12 \cdot 10^2_0$     | $1.28 \cdot 10^5_0$    | NA                                                                                                                                                                                                                                                                                                                                         | 1000·10 <sup>2</sup><br>(NR, NR, NR,<br>NR, NR)                                                                     | NR                                 | 1             | NR                     | [28<br>] |
| Prostate<br>(Healthy)           | 0.42                                                                                                            | NR                    | NR                                      | NR                                     | NR                   | NR         | NR                                     | NR        | NR                      | NR                     | NA                                                                                                                                                                                                                                                                                                                                         | NR                                                                                                                  | NR                                 | NR            | NR                     | [32<br>] |
| Prostate<br>(Healthy)           | $\sigma_{init} = 0.4113 \text{ S} \cdot \text{m}^{-1}$<br>$\sigma_{max} = 0.8712 \text{ S} \cdot \text{m}^{-1}$ | 1000                  | 3600                                    | 0.5                                    | NR                   | 37         | NR                                     | NR        | NR                      | NR                     | $w_b \cdot c_b = 40000$<br>$\text{W} \cdot \text{m}^{-3} \cdot ^\circ\text{C}^{-1}$                                                                                                                                                                                                                                                        | NR                                                                                                                  | NR                                 | NR            | NR                     | [49<br>] |
| Prostate<br>(Healthy)           | $\sigma(n_p) = \sigma_{init} \cdot 1.29 \cdot (1 + 0.36 \cdot (N_p - n_p)^{0.5})^{0.5}$                         | 1000                  | 3500                                    | NA                                     | NA                   | 37         | NA                                     | 37        | NR                      | NR                     | $\sigma_{init} = 0.3$<br>$\text{S} \cdot \text{m}^{-1}$<br>$\alpha \approx 0.13 \cdot 10^{-6}$<br>$\text{m}^2 \cdot \text{s}^{-1}$<br>$r_{fit} = 0.85 \cdot 10^{-3} \text{ m}$<br>$T_{fit} = 3.53$<br>$^\circ\text{C}$ ( $V_p = 1500\text{V}$ )<br>$T_{fit} = 6.28$<br>$^\circ\text{C}$ ( $V_p = 2000\text{V}$ )<br>$\tau = 1.4 \text{ s}$ | NR                                                                                                                  | NR                                 | NR            | NR                     | [64<br>] |
| Prostate<br>(Healthy)           | 0.41                                                                                                            | NR                    | NR                                      | NR                                     | NR                   | NR         | NR                                     | NR        | NR                      | NR                     | NA                                                                                                                                                                                                                                                                                                                                         | 700·10 <sup>2</sup><br>{([1650,<br>2850], 90·10 <sup>-6</sup> ,<br>70, NA, NR),<br>Multiple<br>electrode<br>pairs)} | NR                                 | NR            | NR                     | [67<br>] |
| Prostate<br>(Healthy, Dog)      | $\sigma(E) = \sigma_{init} + (\sigma_{max} - \sigma_{init}) \cdot \exp(-a_1 \cdot \exp(-a_2 \cdot E))$          | NTA                   | NTA                                     | NTA                                    | NTA                  | NTA        | NTA                                    | NTA       | NR                      | NR                     | $\sigma_{init} = 0.284 \text{ S} \cdot \text{m}^{-1}$<br>$\sigma_{max} = 0.65$<br>$\text{S} \cdot \text{m}^{-1}$<br>$a_1 = 3.212$<br>$a_2 = 0.002543$<br>$\text{m} \cdot \text{V}^{-1}$                                                                                                                                                    | 948·10 <sup>2</sup><br>(1250,<br>100·10 <sup>-6</sup> , 100,<br>NA, 1)                                              | NR                                 | NR            | NR                     | [56<br>] |
| Prostate<br>(Healthy,<br>Human) | $\sigma(E) = \sigma_{init} + (\sigma_{max} - \sigma_{init}) \cdot \exp(-a_1 \cdot \exp(-a_2 \cdot E))$          | NTA                   | NTA                                     | NTA                                    | NTA                  | NTA        | NTA                                    | NTA       | NR                      | NR                     | $\sigma_{init} = 0.284 \text{ S} \cdot \text{m}^{-1}$<br>$\sigma_{max} = 0.927 \text{ S} \cdot \text{m}^{-1}$<br>$a_1 = 3.212$<br>$a_2 = 0.002543$<br>$\text{m} \cdot \text{V}^{-1}$                                                                                                                                                       | [1085·10 <sup>2</sup> ,<br>1185·10 <sup>2</sup> ]<br>{(1800, 2100,<br>2625), 70·10 <sup>-6</sup> ,<br>90, NA, CAR)} | NR                                 | NR            | NR                     | [56<br>] |

|                                                       | Calculation of V and E | Calculation of T      |                                         |                                        |                      |            |                                        |           | Calculation of $\Omega$ |                        |                                                              | Ablation parameters                                                                               |                                                  |                                                                                                  |                        |          |
|-------------------------------------------------------|------------------------|-----------------------|-----------------------------------------|----------------------------------------|----------------------|------------|----------------------------------------|-----------|-------------------------|------------------------|--------------------------------------------------------------|---------------------------------------------------------------------------------------------------|--------------------------------------------------|--------------------------------------------------------------------------------------------------|------------------------|----------|
| Name                                                  | $\sigma$               | $\rho$                | $c_p$ or $c_b$                          | k                                      | $Q_m$                | $T_{init}$ | $w_b$                                  | $T_{art}$ | A                       | $U_a$                  | Additional Details/<br>Parameters                            | $E_{IRE(th)}$<br>( $V_{P(th)}$ , $t_{P(th)}$ ,<br>$N_{P(th)}$ , $\tau_{P(th)}$ ,<br>$f_{P(th)}$ ) | $T_{th}$<br>(Exposure<br>duration)               | $\Omega_{th}$                                                                                    | CEM43°C<br>( $_{th}$ ) | Ref      |
|                                                       | [S·m <sup>-1</sup> ]   | [kg·m <sup>-3</sup> ] | [J·kg <sup>-1</sup> ·°C <sup>-1</sup> ] | [W·m <sup>-1</sup> ·°C <sup>-1</sup> ] | [W·m <sup>-3</sup> ] | [°C]       | [kg·m <sup>-3</sup> ·s <sup>-1</sup> ] | [°C]      | [s <sup>-1</sup> ]      | [J·mol <sup>-1</sup> ] |                                                              | [V·m <sup>-1</sup> ]<br>([V], [s], [-],<br>[s], [Hz])                                             | [°C]<br>([s])                                    |                                                                                                  | [min]                  |          |
| Rectum<br>Perirectal<br>tissue<br>(Healthy)           | 0.3                    | NTA                   | NTA                                     | NTA                                    | NTA                  | NTA        | NTA                                    | NTA       | NR                      | NR                     | NA                                                           | {275·10 <sup>2</sup> ,<br>500·10 <sup>2</sup> }<br>(NR, NR, NR,<br>NR, NR)                        | NR                                               | NR                                                                                               | NR                     | [51<br>] |
| Rectum Rectal<br>wall (Healthy)                       | 0.6                    | NTA                   | NTA                                     | NTA                                    | NTA                  | NTA        | NTA                                    | NTA       | NR                      | NR                     | NA                                                           | {275·10 <sup>2</sup> ,<br>500·10 <sup>2</sup> }<br>(NR, NR, NR,<br>NR, NR)                        | NR                                               | NR                                                                                               | NR                     | [51<br>] |
| Saline                                                | {1, 2.5, 4.5, 8}       | 1000                  | 4180                                    | 0.6                                    | NA                   |            | NA                                     | NA        | NA                      | NA                     | $h = 100$<br>W·m <sup>-2</sup> ·°C <sup>-1</sup>             | NA                                                                                                | NA                                               | NA                                                                                               | NA                     | [39<br>] |
| Scar                                                  | 0.2                    | NR                    | NR                                      | NR                                     | NR                   | NR         | NR                                     | NR        | NR                      | NR                     | NA                                                           | NA                                                                                                | NA                                               | NA                                                                                               | NA                     | [79<br>] |
| Skin<br>(Cancerous)                                   | 0.2                    | 1000                  | 4000                                    | 0.5                                    | 33800                | 37         | NR                                     | NR        | NR                      | NR                     | NA                                                           | NR                                                                                                | NR                                               | NR                                                                                               | >10                    | [25<br>] |
| Skin collagen<br>(Healthy)                            | NA                     | NA                    | NA                                      | NA                                     | NA                   | NA         | NA                                     | NA        | 1.606·10 <sup>-45</sup> | 0.306·10 <sup>-6</sup> | $\dot{R} = 8.314$ J<br>mol <sup>-1</sup> K <sup>-1</sup>     | NA                                                                                                | NR                                               | NR                                                                                               | NR                     | [55<br>] |
| Skin dermis<br>(Healthy)                              | 0.015                  | 1116                  | 3800                                    | 0.293                                  | 200                  | 37         | NR                                     | NR        | NR                      | NR                     | $\omega_b =$<br>2.198·10 <sup>-3</sup><br>s <sup>-1</sup>    | 900·10 <sup>2</sup><br>(NR, 100·10 <sup>-6</sup> ,<br>8, NA. 1)                                   | 42<br>(Several seconds<br>to hours)<br><br>50-60 | 0.53<br>(Minimum<br>degree<br>burn)<br><br>10·10 <sup>3</sup><br>(Third<br>degree<br>burn)<br>NR | NR                     | [58<br>] |
| Skin epidermis<br>(Healthy)                           | NA                     | NA                    | NA                                      | NA                                     | NA                   | NA         | NA                                     | NA        | 3.1·10 <sup>98</sup>    | 0.627·10 <sup>-6</sup> | $\dot{R} = 8.314$ J·mol <sup>-1</sup> ·K <sup>-1</sup><br>NA | NA                                                                                                | NR                                               | NR                                                                                               | NR                     | [55<br>] |
| Skin stratum<br>corneum and<br>epidermis<br>(Healthy) | 0.01001                | 1305                  | 3600                                    | 0.2045                                 | 0                    | 37         | 0                                      | NR        | NR                      | NR                     |                                                              | 900·10 <sup>2</sup><br>(NR, 100·10 <sup>-6</sup> ,<br>8, NA. 1)                                   | 42<br>(Several seconds<br>to hours)<br><br>50-60 | 0.53<br>(Minimum<br>degree<br>burn)<br><br>10·10 <sup>3</sup><br>(Third<br>degree<br>burn)       | NR                     | [58<br>] |
| Skin<br>subcutaneous<br>fat                           | 0.02                   | 850                   | 2300                                    | 0.23                                   | 5                    | 37         | NR                                     | NR        | NR                      | NR                     | $\omega_b =$<br>5.142·10 <sup>-4</sup><br>s <sup>-1</sup>    | 900·10 <sup>2</sup><br>(NR, 100·10 <sup>-6</sup> ,<br>8, NA. 1)                                   | 42<br>(Several seconds<br>to hours)<br><br>50-60 | 0.53<br>(Minimum<br>degree<br>burn)<br><br>10·10 <sup>3</sup>                                    | NR                     | [58<br>] |

|                                                     | Calculation of V and E                                                                            | Calculation of T      |                                         |                                        |                      |            |                                        |           | Calculation of $\Omega$ |                        |                                                                                                                                                                                          | Ablation parameters                                                                               |                                        |                                                                      |                        |      |
|-----------------------------------------------------|---------------------------------------------------------------------------------------------------|-----------------------|-----------------------------------------|----------------------------------------|----------------------|------------|----------------------------------------|-----------|-------------------------|------------------------|------------------------------------------------------------------------------------------------------------------------------------------------------------------------------------------|---------------------------------------------------------------------------------------------------|----------------------------------------|----------------------------------------------------------------------|------------------------|------|
| Name                                                | $\sigma$                                                                                          | $\rho$                | $c_p$ or $c_b$                          | k                                      | $Q_m$                | $T_{init}$ | $w_b$                                  | $T_{art}$ | A                       | $U_a$                  | Additional Details/<br>Parameters                                                                                                                                                        | $E_{IRE(th)}$<br>( $V_{P(th)}$ , $t_{P(th)}$ ,<br>$N_{P(th)}$ , $\tau_{P(th)}$ ,<br>$f_{P(th)}$ ) | $T_{th}$<br>(Exposure<br>duration)     | $\Omega_{th}$                                                        | CEM43°C<br>( $_{th}$ ) | Ref  |
|                                                     | [S·m <sup>-1</sup> ]                                                                              | [kg·m <sup>-3</sup> ] | [J·kg <sup>-1</sup> ·°C <sup>-1</sup> ] | [W·m <sup>-1</sup> ·°C <sup>-1</sup> ] | [W·m <sup>-3</sup> ] | [°C]       | [kg·m <sup>-3</sup> ·s <sup>-1</sup> ] | [°C]      | [s <sup>-1</sup> ]      | [J·mol <sup>-1</sup> ] |                                                                                                                                                                                          | [V·m <sup>-1</sup> ]<br>([V], [s], [-],<br>[s], [Hz])                                             | [°C]<br>([s])                          |                                                                      | [min]                  |      |
|                                                     |                                                                                                   |                       |                                         |                                        |                      |            |                                        |           |                         |                        |                                                                                                                                                                                          |                                                                                                   |                                        | (Third degree burn)                                                  |                        |      |
| Skin subcutaneous tissue (Cancerous)                | $\sigma(E) = (\sigma_{max} - \sigma_{init}) \cdot E / (E_{IRE(th)} - E_{RE(th)}) + \sigma_{init}$ | 1050                  | 3600                                    | 0.51                                   | 420                  | 37         | 4.664                                  | 37        | NR                      | NR                     | $\sigma_{init} = 0.2$ S·m <sup>-1</sup><br>$\sigma_{max} = 0.8$ S·m <sup>-1</sup><br>$E_{RE(th)} = 400 \cdot 10^2$ V·m <sup>-1</sup><br>$E_{IRE(th)} = 900 \cdot 10^2$ V·m <sup>-1</sup> | 900·10 <sup>2</sup> (NR, NR, NR, NR, NR)                                                          | 50                                     | NR                                                                   | NR                     | [42] |
| Skin subcutaneous tissue (Cancerous)                | 0.4                                                                                               | 1050                  | 3700                                    | 0.75                                   | 42000                | 37         | NR                                     | NR        | NR                      | NR                     | $\omega_b = 2 \cdot 10^{-3}$ s <sup>-1</sup>                                                                                                                                             | 900·10 <sup>2</sup> (NR, 100·10 <sup>-6</sup> , 8, NA. 1)                                         | 42 (Several seconds to hours)<br>50-60 | 0.53 (Minimum degree burn)<br>10·10 <sup>3</sup> (Third degree burn) | NR                     | [58] |
| Skin subcutaneous tissue (Healthy)                  | 0.41                                                                                              | 1040                  | 3800                                    | 0.5                                    | 800                  | 37         | NR                                     | NR        | NR                      | NR                     | $\omega_b = 6.557 \cdot 10^{-4}$ s <sup>-1</sup>                                                                                                                                         | 900·10 <sup>2</sup> (NR, 100·10 <sup>-6</sup> , 8, NA. 1)                                         | 42 (Several seconds to hours)<br>50-60 | 0.53 (Minimum degree burn)<br>10·10 <sup>3</sup> (Third degree burn) | NR                     | [58] |
| Small intestine (Homogeneous)                       | 0.61                                                                                              | 1000                  | 3750                                    | 0.5                                    | NA                   | 37         | NA                                     | NA        | 1.552·10 <sup>67</sup>  | 4.3·10 <sup>5</sup>    | NA                                                                                                                                                                                       | 500·10 <sup>2</sup> (NR, NR, NR, NR, NR)                                                          | NR                                     | 0.53                                                                 | NR                     | [59] |
| Small intestine mucosa 2 (Healthy, Excluding villi) | $\sigma(E) = \sigma_{init} \cdot (1 + \Lambda \cdot 2 \cdot \ln(2hs(E - E_{alt}, E_{range})))$    | 1000                  | 3750                                    | 0.5                                    | NA                   | 37         | NA                                     | NA        | 1.552·10 <sup>67</sup>  | 4.3·10 <sup>5</sup>    | $\sigma_{init} = \{0.1, 0.4, 0.8\}$ S·m <sup>-1</sup><br>$\Lambda = 4$<br>$E_{alt} = 600 \cdot 10^2$ V·m <sup>-1</sup>                                                                   | 600·10 <sup>2</sup> (NR, NR, NR, NR, NR)                                                          | NR                                     | 0.53                                                                 | NR                     | [59] |

|                                                                   | Calculation of V and E                                                                                 | Calculation of T      |                                         |                                        |                      |            |                                        |           | Calculation of $\Omega$ |                        |                                                                                                                                                                                   | Ablation parameters                                                                               |                                    |               |                        |      |
|-------------------------------------------------------------------|--------------------------------------------------------------------------------------------------------|-----------------------|-----------------------------------------|----------------------------------------|----------------------|------------|----------------------------------------|-----------|-------------------------|------------------------|-----------------------------------------------------------------------------------------------------------------------------------------------------------------------------------|---------------------------------------------------------------------------------------------------|------------------------------------|---------------|------------------------|------|
| Name                                                              | $\sigma$                                                                                               | $\rho$                | $c_p$ or $c_b$                          | k                                      | $Q_m$                | $T_{init}$ | $w_b$                                  | $T_{art}$ | A                       | $U_a$                  | Additional Details/<br>Parameters                                                                                                                                                 | $E_{IRE(th)}$<br>( $V_{P(th)}$ , $t_{P(th)}$ ,<br>$N_{P(th)}$ , $\tau_{P(th)}$ ,<br>$f_{P(th)}$ ) | $T_{th}$<br>(Exposure<br>duration) | $\Omega_{th}$ | CEM43°C<br>( $_{th}$ ) | Ref  |
|                                                                   | [S·m <sup>-1</sup> ]                                                                                   | [kg·m <sup>-3</sup> ] | [J·kg <sup>-1</sup> ·°C <sup>-1</sup> ] | [W·m <sup>-1</sup> ·°C <sup>-1</sup> ] | [W·m <sup>-3</sup> ] | [°C]       | [kg·m <sup>-3</sup> ·s <sup>-1</sup> ] | [°C]      | [s <sup>-1</sup> ]      | [J·mol <sup>-1</sup> ] |                                                                                                                                                                                   | [V·m <sup>-1</sup> ]<br>([V], [s], [-],<br>[s], [Hz])                                             | [°C]<br>([s])                      |               | [min]                  |      |
|                                                                   |                                                                                                        |                       |                                         |                                        |                      |            |                                        |           |                         |                        | $E_{range} = 150 \cdot 10^2$<br>V·m <sup>-1</sup>                                                                                                                                 |                                                                                                   |                                    |               |                        |      |
| Small intestine mucosa 3 (Healthy, Including villi)               | $\sigma(E) = \sigma_{init} \cdot (1 + \Lambda \cdot 2 \cdot flc2hs(E - E_{alt}, E_{range}))$           | 1000                  | 3750                                    | 0.5                                    | NA                   | 37         | NA                                     | NA        | $1.552 \cdot 10^{67}$   | $4.3 \cdot 10^5$       | $\sigma_{init} = \{0.1, 0.4, 0.8\}$<br>S·m <sup>-1</sup><br>$\Lambda = 4$<br>$E_{alt} = 600 \cdot 10^2$<br>V·m <sup>-1</sup><br>$E_{range} = 150 \cdot 10^2$<br>V·m <sup>-1</sup> | $600 \cdot 10^2$<br>(NR, NR, NR, NR, NR)                                                          | NR                                 | 0.53          | NR                     | [59] |
| Small intestine submucosa 1 (Healthy)                             | $\sigma(E) = \sigma_{init} \cdot (1 + \Lambda \cdot 2 \cdot flc2hs(E - E_{alt}, E_{range}))$           | 1000                  | 3750                                    | 0.5                                    | NA                   | 37         | NA                                     | NA        | $1.552 \cdot 10^{67}$   | $4.3 \cdot 10^5$       | $\sigma_{init} = \{0.1, 0.4, 0.8\}$<br>S·m <sup>-1</sup><br>$\Lambda = 4$<br>$E_{alt} = 600 \cdot 10^2$<br>V·m <sup>-1</sup><br>$E_{range} = 150 \cdot 10^2$<br>V·m <sup>-1</sup> | $600 \cdot 10^2$<br>(NR, NR, NR, NR, NR)                                                          | NR                                 | 0.53          | NR                     | [59] |
| Soft tissue (Healthy, Combination of muscle, fat and body fluids) | 0.2                                                                                                    | NR                    | NR                                      | NR                                     | NR                   | NR         | NR                                     | NR        | NR                      | NR                     | NA                                                                                                                                                                                | NR                                                                                                | NR                                 | NR            | NR                     | [71] |
| Urethra (Healthy)                                                 | $\sigma(E) = \sigma_{init} + (\sigma_{max} - \sigma_{init}) \cdot \exp(-a_1 \cdot \exp(-a_2 \cdot E))$ | NTA                   | NTA                                     | NTA                                    | NTA                  | NTA        | NTA                                    | NTA       | NR                      | NR                     | $\sigma_{init} = 0.203$ S·m <sup>-1</sup><br>$\sigma_{max} = 0.337$ S·m <sup>-1</sup><br>$a_1 = 3.212$<br>$a_2 = 0.002543$<br>m·V <sup>-1</sup>                                   | NR                                                                                                | NR                                 | NR            | NR                     | [56] |
| Urine                                                             | 1.9                                                                                                    | NA                    | NA                                      | NA                                     | NA                   | NA         | NA                                     | NA        | NA                      | NA                     | NA                                                                                                                                                                                | NA                                                                                                | NA                                 | NA            | NA                     | [64] |
| Well plate                                                        | $1 \cdot 10^{-16}$                                                                                     | 1050                  | 1300                                    | 0.14                                   | NA                   | 22         | NA                                     | NA        | NA                      | NA                     | NA                                                                                                                                                                                | NA                                                                                                | NA                                 | NA            | NA                     | [43] |

**Table A6.3**

Table A6.3 Data about the electrode type, pulse parameters and BC at BEM used in the included studies. This table was arranged according to the reference number. The brackets “{ }” are defined as a set of elements, “[a, b]” is defined as the range between and including the values a and b assuming  $\{a, b\} \in \mathbb{R}$ , and “[a:c:b]” is defined as the range between and including the values a and b with step c assuming  $\{a, b, c\} \in \mathbb{R}$ . The following abbreviations are used: NR (Not reported), NA (Not applicable), NC (Not clear), NTA (No thermal analysis), and ND (Not defined).

| Electrodes     |                                                             |                                                                              |          |        |                                                                              | Square pulse parameters                                  |                                                                     |                                                       |          |                      | Boundary conditions (BC) applied to boundaries between electrodes and medium (BEM) |                                                                                                                          | Ref. |
|----------------|-------------------------------------------------------------|------------------------------------------------------------------------------|----------|--------|------------------------------------------------------------------------------|----------------------------------------------------------|---------------------------------------------------------------------|-------------------------------------------------------|----------|----------------------|------------------------------------------------------------------------------------|--------------------------------------------------------------------------------------------------------------------------|------|
| Shape          | $\emptyset$                                                 | L                                                                            | Geometry | Number | d                                                                            | $V_p$                                                    | $t_p$                                                               | $N_p$                                                 | $\tau_p$ | $f_p$                | Type electrical BC at BEM                                                          | Type thermal BC at BEM                                                                                                   |      |
|                | [m]                                                         | [m]                                                                          |          |        | [m]                                                                          | [V]                                                      | [s]                                                                 |                                                       | [s]      | [Hz]                 |                                                                                    |                                                                                                                          |      |
| Circle         | $\{0.5 \cdot 10^{-3}, 1 \cdot 10^{-3}, 1.5 \cdot 10^{-3}\}$ | NA                                                                           | Lateral  | {2, 4} | $\{5 \cdot 10^{-3}, 7.5 \cdot 10^{-3}, 10 \cdot 10^{-3}\}$                   | {888, 891, 928, 971, 1143, 1212, 1331, 1438, 1613, 1716} | $\{200 \cdot 10^{-6}, 400 \cdot 10^{-6}, 800 \cdot 10^{-6}\}$       | 1                                                     | NA       | NA                   | Dirichlet ( $\{V_p, 0\}$ )                                                         | Neumann                                                                                                                  | [3]  |
| Plate          | $10 \cdot 10^{-3}$                                          | NA                                                                           | Lateral  | 2      | $4 \cdot 10^{-3}$                                                            | 400                                                      | $20000 \cdot 10^{-6}$                                               | 1                                                     | NA       | NA                   | Dirichlet ( $\{V_p, 0\}$ )                                                         | Neumann                                                                                                                  | [24] |
| Plate          | NR                                                          | NA                                                                           | Lateral  | 2      | $\{3 \cdot 10^{-3}, 4 \cdot 10^{-3}, 5 \cdot 10^{-3}\}$                      | {600, 1000}                                              | $\{100 \cdot 10^{-6}, 800 \cdot 10^{-6}, 1000 \cdot 10^{-6}\}$      | {1, 8, 64, 80}                                        | NA       | {0.03, 0.3, 1, 5000} | Dirichlet ( $\{V_p, 0\}$ )                                                         | Robin ( $h = 15 \text{ W} \cdot \text{m}^{-2} \cdot ^\circ\text{C}^{-1}$ , $T_{\text{env}} = 25^\circ\text{C}$ )         | [25] |
| Circular plate | $\{2.5 \cdot 10^{-3}, 5 \cdot 10^{-3}, 10 \cdot 10^{-3}\}$  | NR                                                                           | Lateral  | 2      | $4 \cdot 10^{-3}$                                                            | 400                                                      | NA                                                                  | NA                                                    | NA       | NA                   | Dirichlet                                                                          | NTA                                                                                                                      | [26] |
| Cylinder       | $\{0.5 \cdot 10^{-3}, 1 \cdot 10^{-3}, 2 \cdot 10^{-3}\}$   | $\{2.5 \cdot 10^{-3}, 5 \cdot 10^{-3}, 10 \cdot 10^{-3}, 20 \cdot 10^{-3}\}$ | Lateral  | 2      | $\{5 \cdot 10^{-3}, 7.5 \cdot 10^{-3}, 10 \cdot 10^{-3}, 17 \cdot 10^{-3}\}$ | 1000                                                     | $100 \cdot 10^{-6}$                                                 | 1                                                     | NA       | NA                   | Dirichlet                                                                          | Neumann                                                                                                                  | [26] |
| Plate          | $\infty$                                                    | NA                                                                           | Lateral  | 2      | $10 \cdot 10^{-3}$                                                           | {500, 1000, 2000}                                        | $\{8000 \cdot 10^{-6}, 25600 \cdot 10^{-6}, 104000 \cdot 10^{-6}\}$ | 1                                                     | NA       | NA                   | Dirichlet ( $\{V_p, 0\}$ )                                                         | Neumann                                                                                                                  | [27] |
| Cylinder       | $1 \cdot 10^{-3}$                                           | NA                                                                           | Lateral  | 2      | $10 \cdot 10^{-3}$                                                           | {500, 1000, 2000}                                        | $\{510 \cdot 10^{-6}, 2110 \cdot 10^{-6}, 8960 \cdot 10^{-6}\}$     | 1                                                     | NA       | NA                   | Dirichlet ( $\{V_p, 0\}$ )                                                         | Neumann                                                                                                                  | [27] |
| Sphere         | $1 \cdot 10^{-3}$                                           | NA                                                                           | Lateral  | 2      | $10 \cdot 10^{-3}$                                                           | {500, 1000, 2000}                                        | $\{51.6 \cdot 10^{-6}, 242 \cdot 10^{-6}, 864 \cdot 10^{-6}\}$      | 1                                                     | NA       | NA                   | Dirichlet ( $\{V_p, 0\}$ )                                                         | Neumann                                                                                                                  | [27] |
| Cylinder       | $1 \cdot 10^{-3}$                                           | NA                                                                           | Lateral  | 2      | $10 \cdot 10^{-3}$                                                           | 2000                                                     | $100 \cdot 10^{-6}$                                                 | 1                                                     | NA       | NA                   | Dirichlet ( $\{V_p, 0\}$ )                                                         | Dirichlet ( $37^\circ\text{C}$ )                                                                                         | [28] |
| Needle         | $1 \cdot 10^{-3}$                                           | $8.75 \cdot 10^{-3}$                                                         | Lateral  | 2      | $8 \cdot 10^{-3}$                                                            | {4200, 2950, 6850}                                       | $100 \cdot 10^{-6}$                                                 | 1                                                     | NA       | NA                   | Dirichlet                                                                          | Robin ( $h = 50 \text{ W} \cdot \text{m}^{-2} \cdot ^\circ\text{C}^{-1}$ )                                               | [29] |
| Plate          | $\infty$                                                    | $\infty$                                                                     | Lateral  | 2      | $2 \cdot 10^{-3}$                                                            | $[1000 \cdot 10^2, 7500 \cdot 10^2]$                     | $[250 \cdot 10^{-6}, 7500 \cdot 10^{-6}]$                           | 1                                                     | NA       | NA                   | NA                                                                                 | Robin                                                                                                                    | [30] |
| Needle         | $1 \cdot 10^{-3}$                                           | $5 \cdot 10^{-3}$                                                            | Lateral  | 2      | $5 \cdot 10^{-3}$                                                            | {500, 1000}                                              | $50 \cdot 10^{-6}$                                                  | 9 sets $\times$ 10 pulses (Sets were separated by 1s) | NA       | 4                    | Dirichlet ( $\{V_p, 0\}$ )                                                         | Continuous ( $h = 10 \text{ W} \cdot \text{m}^{-2} \cdot ^\circ\text{C}^{-1}$ with $T_{\text{env}} = 23^\circ\text{C}$ ) | [31] |

| Electrodes                                                           |                                                                         |                                                |                   |        |                                                                                                                                           | Square pulse parameters            |                                                               |            |          |                         | Boundary conditions (BC) applied to boundaries between electrodes and medium (BEM) |                                                                               |      |
|----------------------------------------------------------------------|-------------------------------------------------------------------------|------------------------------------------------|-------------------|--------|-------------------------------------------------------------------------------------------------------------------------------------------|------------------------------------|---------------------------------------------------------------|------------|----------|-------------------------|------------------------------------------------------------------------------------|-------------------------------------------------------------------------------|------|
| Shape                                                                | $\emptyset$                                                             | L                                              | Geometry          | Number | d                                                                                                                                         | $V_p$                              | $\tau_p$                                                      | $N_p$      | $\tau_p$ | $f_p$                   | Type electrical BC at BEM                                                          | Type thermal BC at BEM                                                        | Ref. |
|                                                                      | [m]                                                                     | [m]                                            |                   |        | [m]                                                                                                                                       | [V]                                | [s]                                                           |            | [s]      | [Hz]                    |                                                                                    |                                                                               |      |
| Circle                                                               | $1 \cdot 10^{-3}$                                                       | NA                                             | Lateral           | 2      | $10 \cdot 10^{-3}$                                                                                                                        | {0.5, 1.5, 2.5}<br>(Dimensionless) | NA                                                            | NA         | NA       | NA                      | Dirichlet                                                                          | NTA                                                                           | [32] |
| Endovascular                                                         | $0.1 \cdot 10^{-3} \times 0.5 \cdot 10^{-3}$<br>(Width $\times$ Length) | NA                                             | Plus shape        | 4      | $2.12 \cdot 10^{-3}$<br>(Radius until the top electrode is $1.35 \cdot 10^{-3}$ m, Angle of $90^\circ$ to the other electrode)            | 600                                | $100 \cdot 10^{-6}$                                           | 90         | NA       | 4                       | Dirichlet<br>( $\{V_p, 0\}$ )                                                      | NR                                                                            | [33] |
| Endovascular                                                         | $0.1 \cdot 10^{-3} \times 0.5 \cdot 10^{-3}$<br>(Width $\times$ Length) | NA                                             | Plus shape        | 4      | $2.12 \cdot 10^{-3}$<br>(Radius until the top electrode is $1.35 \cdot 10^{-3}$ m, $90^\circ$ angle to the top center of other electrode) | [450:50:750]                       | $100 \cdot 10^{-6}$                                           | 90         | NA       | {0.5, 1, 2.5, 4, 5, 10} | Dirichlet                                                                          | NR                                                                            | [34] |
| Bipolar                                                              | { $0.5 \cdot 10^{-3}$ , $1.2 \cdot 10^{-3}$ }                           | { $2.15 \cdot 10^{-3}$ , $2.5 \cdot 10^{-3}$ } | Lateral           | 2      | $4.625 \cdot 10^{-3}$                                                                                                                     | 1300                               | NA                                                            | NA         | NA       | NA                      | Dirichlet<br>( $\{V_p, 0\}$ )                                                      | NTA                                                                           | [35] |
| Rectangular plate                                                    | $3 \cdot 10^{-3}$                                                       | NA                                             | Lateral           | 2      | $0.4 \cdot 10^{-3}$                                                                                                                       | 70                                 | $100 \cdot 10^{-6}$                                           | 90         | NA       | {1, 4}                  | Dirichlet<br>( $\{V_p, 0\}$ )                                                      | Continuous                                                                    | [36] |
| Rectangular plate                                                    | $20 \cdot 10^{-3}$                                                      | NA                                             | Lateral           | 2      | $10 \cdot 10^{-3}$                                                                                                                        | 1500                               | $100 \cdot 10^{-6}$                                           | 99         | NA       | 4                       | Dirichlet                                                                          | Continuous                                                                    | [37] |
| Circle                                                               | NC                                                                      | NA                                             | Lateral           | 2      | NC                                                                                                                                        | {1000, 1500, 2500}                 | NA<br>(NTA)                                                   | NA         | NA       | NA                      | Dirichlet<br>( $\{V_p, 0\}$ )                                                      | NTA                                                                           | [38] |
| Circle                                                               | $1 \cdot 10^{-3}$                                                       | NA                                             | Lateral           | 2      | $10 \cdot 10^{-3}$                                                                                                                        | {1000, 2000, 3000}                 | $100 \cdot 10^{-6}$                                           | 8          | 1        | NA                      | Dirichlet<br>( $\{V_p, 0\}$ )                                                      | Neumann                                                                       | [39] |
| Needle                                                               | $1 \cdot 10^{-3}$                                                       | $5 \cdot 10^{-3}$                              | Lateral           | 2      | $5 \cdot 10^{-3}$                                                                                                                         | {500, 1000, 1500}                  | 50                                                            | {4x20, 80} | NA       | {0.5, 1, 4}             | Dirichlet<br>( $\{V_p, 0\}$ )                                                      | Robin<br>( $h = 10 \text{ W} \cdot \text{m}^{-2} \cdot ^\circ\text{C}^{-1}$ ) | [40] |
| Circular plate                                                       | NR                                                                      | NA                                             | Lateral           | 2      | $0.4 \cdot 10^{-3}$                                                                                                                       | 70                                 | $100 \cdot 10^{-6}$                                           | 90         | NA       | 4                       | Dirichlet<br>( $\{V_p, 0\}$ )                                                      | Continuous                                                                    | [41] |
| Endovascular                                                         | $0.1 \cdot 10^{-3} \times 0.5 \cdot 10^{-3}$<br>(Width $\times$ Length) | NA                                             | Plus shape        | 4      | $2.12 \cdot 10^{-3}$<br>(Radius until the top electrode is $1.35 \cdot 10^{-3}$ m, $90^\circ$ angle to the top center of other electrode) | 600                                | $100 \cdot 10^{-6}$                                           | 90         | NA       | 4                       | Dirichlet<br>( $\{V_p, V_p, 0, 0\}$ )                                              | NR                                                                            | [41] |
| Cylinder                                                             | NR                                                                      | NR                                             | Rectangular shape | 6      | NR                                                                                                                                        | 500                                | $100 \cdot 10^{-6}$                                           | 50         | NA       | 1                       | Dirichlet                                                                          | NR                                                                            | [42] |
| Needle                                                               | $1.3 \cdot 10^{-3}$                                                     | $2.45 \cdot 10^{-3}$                           | Lateral           | 2      | $3.35 \cdot 10^{-3}$                                                                                                                      | {150, 300, 450, 600}               | $100 \cdot 10^{-6}$                                           | 80         | NA       | 1                       | Dirichlet<br>( $\{V_p, 0\}$ )                                                      | Continuous                                                                    | [43] |
| {Internal semi-spherical surface electrode, External disk electrode} | {NR, $2 \cdot 10^{-3}$ }                                                | NA                                             | Lateral           | 2      | $6 \cdot 10^{-3}$                                                                                                                         | [500:250:2000]                     | { $1 \cdot 10^{-6}$ , $1 \cdot 10^{-5}$ , $1 \cdot 10^{-4}$ } | 90         | NA       | {0.1, 0.5, 1, 2, 10}    | Dirichlet<br>( $\{V_p, 0\}$ )                                                      | NR                                                                            | [44] |

| Electrodes                                                                        |                                                                                  |                                                                                  |               |        |                                          | Square pulse parameters |                                                                |              |          |                      | Boundary conditions (BC) applied to boundaries between electrodes and medium (BEM) |                        |      |
|-----------------------------------------------------------------------------------|----------------------------------------------------------------------------------|----------------------------------------------------------------------------------|---------------|--------|------------------------------------------|-------------------------|----------------------------------------------------------------|--------------|----------|----------------------|------------------------------------------------------------------------------------|------------------------|------|
| Shape                                                                             | $\emptyset$                                                                      | L                                                                                | Geometry      | Number | d                                        | $V_P$                   | $\tau_P$                                                       | $N_P$        | $\tau_P$ | $f_P$                | Type electrical BC at BEM                                                          | Type thermal BC at BEM | Ref. |
|                                                                                   | [m]                                                                              | [m]                                                                              |               |        | [m]                                      | [V]                     | [s]                                                            |              | [s]      | [Hz]                 |                                                                                    |                        |      |
| {Internal disk electrode, External disk electrode}                                | $\{2 \cdot 10^{-3}, 2 \cdot 10^{-3}\}$                                           | NA                                                                               | Lateral       | 2      | $6 \cdot 10^{-3}$                        | [500:250:2000]          | NA                                                             | NA           | NA       | NA                   | Dirichlet ( $\{V_P, 0\}$ )                                                         | NR                     | [44] |
| {Internal semi-spherical surface electrode, External spherical surface electrode} | {NR, NR}                                                                         | NA                                                                               | Lateral       | 2      | $6 \cdot 10^{-3}$                        | [500:250:2000]          | $\{1 \cdot 10^{-6}, 1 \cdot 10^{-5}, 1 \cdot 10^{-4}\}$        | 90           | NA       | [0.1, 0.5, 1, 2, 10] | Dirichlet ( $\{V_P, 0\}$ )                                                         | NR                     | [44] |
| {External ring electrode, External disk electrode}                                | $\{10 \cdot 10^{-3}, 2 \cdot 10^{-3}\}$                                          | NA                                                                               | Lateral       | 2      | $5 \cdot 10^{-3}$                        | [500:250:2000]          | $\{1 \cdot 10^{-6}, 1 \cdot 10^{-5}, 1 \cdot 10^{-4}\}$        | 90           | NA       | [0.1, 0.5, 1, 2, 10] | Dirichlet ( $\{V_P, 0\}$ )                                                         | NR                     | [44] |
| {Internal disk electrode, External disk electrode, External disk electrode }      | $\{2 \cdot 10^{-3}, 2 \cdot 10^{-3}, 2 \cdot 10^{-3}\}$                          | NA                                                                               | Lateral       | 3      | NR                                       | [500:250:2000]          | NA                                                             | NA           | NA       | NA                   | Dirichlet ( $\{V_P, 0\}$ )                                                         | NR                     | [44] |
| Cylinder                                                                          | $1 \cdot 10^{-3}$                                                                | $10 \cdot 10^{-3}$                                                               | Lateral       | 2      | $10 \cdot 10^{-3}$                       | 2000                    | $\{0, 5 \cdot 10^{-6}, 100 \cdot 10^{-6}, 400 \cdot 10^{-6}\}$ | {1, 100}     | NA       | 1                    | Dirichlet                                                                          | NR                     | [45] |
| Needle                                                                            | $1 \cdot 10^{-3}$                                                                | $10 \cdot 10^{-3}$                                                               | Square        | 4      | $10 \cdot 10^{-3}$                       | {1000, 1200}            | NA                                                             | NA           | NA       | NA                   | Dirichlet ( $\{V_P, V_P, 0, 0\}$ )                                                 | NTA                    | [46] |
| Cylinder                                                                          | $1 \cdot 10^{-3}$                                                                | 0<br>(Electrodes touches the surface of tissue)                                  | Lateral       | 2      | $5 \cdot 10^{-3}$                        | 1000                    | NA                                                             | NA           | NA       | NA                   | Dirichlet ( $\{-V_P/2, V_P/2\}$ )                                                  | NTA                    | [47] |
| Rectangular plate                                                                 | $5 \cdot 10^{-3}$<br>(Width)                                                     | $35 \cdot 10^{-3}$                                                               | Lateral       | 2      | $3.98 \cdot 10^{-3}$                     | 500                     | $50 \cdot 10^{-6}$                                             | 200          | NA       | 1                    | Dirichlet ( $\{V_P, 0V\}$ )                                                        | NR                     | [48] |
| Cylinder                                                                          | $1 \cdot 10^{-3}$                                                                | $15 \cdot 10^{-3}$                                                               | Lateral       | 2      | $10 \cdot 10^{-3}$                       | 1750                    | $100 \cdot 10^{-6}$                                            | 1            | NA       | NA                   | NR                                                                                 | NR                     | [49] |
| {Inner electrode: Needle, Outer Electrode: Ring} (Dorsal Skin Fold Chamber)       | $1 \cdot 10^{-3}$<br>(Inner electrode)<br>$5 \cdot 10^{-3}$<br>(Outer electrode) | $1 \cdot 10^{-3}$<br>(Inner electrode)<br>$1 \cdot 10^{-3}$<br>(Outer electrode) | Coaxial shape | 2      | $4.5 \cdot 10^{-3}$<br>(Edge-to-Edge)    | 500                     | [10, 50, 100]                                                  | [10, 50, 99] | NA       | 10                   | Dirichlet ( $\{V_P, 0\}$ )                                                         | NTA                    | [50] |
| Monopolar endorectal probe                                                        | $30 \cdot 10^{-3}$                                                               | NC                                                                               | NC            | 1      | NC                                       | [1000:50:2500]          | NTA                                                            | NTA          | NTA      | NTA                  | Dirichlet ( $\{V_P, 0\}$ )                                                         | NTA                    | [51] |
| Bipolar endorectal probe                                                          | $30 \cdot 10^{-3}$                                                               | $10 \cdot 10^{-3}$                                                               | Lateral       | 2      | $17 \cdot 10^{-3}$                       | [1000:50:2500]          | NTA                                                            | NTA          | NTA      | NTA                  | Dirichlet ( $\{V_P, 0\}$ )                                                         | NTA                    | [51] |
| Monopolar cylinder                                                                | $1 \cdot 10^{-3}$                                                                | $21 \cdot 10^{-3}$                                                               | Lateral       | 2      | NR                                       | {2000, 2250, 2500}      | NTA                                                            | NTA          | NTA      | NTA                  | Dirichlet ( $\{V_P, 0\}$ )                                                         | NTA                    | [52] |
| Bipolar cylinder                                                                  | $1 \cdot 10^{-3}$                                                                | $21 \cdot 10^{-3}$                                                               | Lateral       | 2      | $\{10 \cdot 10^{-3}, 15 \cdot 10^{-3}\}$ | {2100, 2400}            | NTA                                                            | NTA          | NTA      | NTA                  | Dirichlet ( $\{V_P, 0\}$ )                                                         | NTA                    | [52] |
| Bipolar cylinder                                                                  | $1.65 \cdot 10^{-3}$                                                             | $7 \cdot 10^{-3}$                                                                | Lateral       | 2      | $15 \cdot 10^{-3}$                       | {500, 3000}             | $100 \cdot 10^{-6}$                                            | 90           | NA       | 1                    | Dirichlet                                                                          | Continuous             | [53] |
| Rectangular plat                                                                  | NA                                                                               | $7 \cdot 10^{-3}$                                                                | Lateral       | 2      | $3 \cdot 10^{-3}$                        | 360                     | NA                                                             | NA           | NA       | NA                   | Dirichlet                                                                          | NTA                    | [54] |



| Electrodes                           |                                                                    |                                                             |             |        |                                                                                                                     | Square pulse parameters                 |                                                                                                                       |          |          |       | Boundary conditions (BC) applied to boundaries between electrodes and medium (BEM) |                                                                                                                                   |      |
|--------------------------------------|--------------------------------------------------------------------|-------------------------------------------------------------|-------------|--------|---------------------------------------------------------------------------------------------------------------------|-----------------------------------------|-----------------------------------------------------------------------------------------------------------------------|----------|----------|-------|------------------------------------------------------------------------------------|-----------------------------------------------------------------------------------------------------------------------------------|------|
| Shape                                | $\emptyset$                                                        | L                                                           | Geometry    | Number | d                                                                                                                   | $V_P$                                   | $\tau_P$                                                                                                              | $N_P$    | $\tau_P$ | $f_P$ | Type electrical BC at BEM                                                          | Type thermal BC at BEM                                                                                                            | Ref. |
|                                      | [m]                                                                | [m]                                                         |             |        | [m]                                                                                                                 | [V]                                     | [s]                                                                                                                   |          | [s]      | [Hz]  |                                                                                    |                                                                                                                                   |      |
| Cylinder                             | $\{0.5 \cdot 10^{-3}, 1 \cdot 10^{-3}, 1.5 \cdot 10^{-3}\}$        | $\{5 \cdot 10^{-3}, 10 \cdot 10^{-3}, 15 \cdot 10^{-3}\}$   | Lateral     | 2      | $\{2.5 \cdot 10^{-3}, 5 \cdot 10^{-3}, 7.5 \cdot 10^{-3}, 10 \cdot 10^{-3}, 15 \cdot 10^{-3}, 22.5 \cdot 10^{-3}\}$ | [500:500:2500]                          | $\{90 \cdot 10^{-6}, 100 \cdot 10^{-6}, 110 \cdot 10^{-6}, 120 \cdot 10^{-6}, 200 \cdot 10^{-6}, 300 \cdot 10^{-6}\}$ | 1        | NA       | NA    | Dirichlet $\{V_P/2, -V_P/2\}$                                                      | Continuous                                                                                                                        | [55] |
| Cylinder                             | $1 \cdot 10^{-3}$                                                  | $5 \cdot 10^{-3}$                                           | Lateral     | 2      | $\{10 \cdot 10^{-2}, 12 \cdot 10^{-2}, 14 \cdot 10^{-2}, 15 \cdot 10^{-2}\}$                                        | {1250, 1800, 2100, 2625}                | NA                                                                                                                    | NA       | NA       | NA    | NR                                                                                 | NTA                                                                                                                               | [56] |
| Cylinder                             | $1 \cdot 10^{-3}$                                                  | $5 \cdot 10^{-3}$                                           | Lateral     | 2      | $5 \cdot 10^{-3}$                                                                                                   | [500:500:2500]                          | NA                                                                                                                    | NA       | NA       | NA    | Dirichlet $\{V_P, 0\}$                                                             | NTA                                                                                                                               | [57] |
| Cylinder                             | $\{0.5 \cdot 10^{-3}, 0.25 \cdot 10^{-3}, 2 \cdot 10^{-3}\}$       | $\{0.5 \cdot 10^{-3}, 0.5 \cdot 10^{-3}, 5 \cdot 10^{-3}\}$ | Lateral     | 2      | $\{1 \cdot 10^{-3}, 0.5 \cdot 10^{-3}, 5 \cdot 10^{-3}\}$                                                           | [600, 2000] (With steps of 200 and 250) | $100 \cdot 10^{-6}$                                                                                                   | 1        | NA       | NA    | Dirichlet                                                                          | Continuous                                                                                                                        | [58] |
| Cylinder                             | $\{0.5 \cdot 10^{-3}, 0.25 \cdot 10^{-3}, 2 \cdot 10^{-3}\}$       | $\{0.5 \cdot 10^{-3}, 0.5 \cdot 10^{-3}, 5 \cdot 10^{-3}\}$ | Rectangular | 4      | $\{1 \cdot 10^{-3}, 0.5 \cdot 10^{-3}, 5 \cdot 10^{-3}\}$                                                           | [600, 2000] (With steps of 200 and 250) | $100 \cdot 10^{-6}$                                                                                                   | 1        | NA       | NA    | Dirichlet                                                                          | Continuous                                                                                                                        | [58] |
| Cylinder                             | $\{0.5 \cdot 10^{-3}, 0.25 \cdot 10^{-3}, 2 \cdot 10^{-3}\}$       | $\{0.5 \cdot 10^{-3}, 0.5 \cdot 10^{-3}, 5 \cdot 10^{-3}\}$ | Hexagonal   | 6      | $\{[1 \cdot 10^{-3}, 5 \cdot 10^{-3}], 4 \cdot 3^{-0.5}\}$                                                          | [600, 2000] (With steps of 200 and 250) | $100 \cdot 10^{-6}$                                                                                                   | 1        | NA       | NA    | Dirichlet                                                                          | Continuous                                                                                                                        | [58] |
| Plate                                | $9.4 \cdot 10^{-3}$                                                | NA                                                          | Lateral     | 2      | $1 \cdot 10^{-3}$                                                                                                   | 200                                     | $70 \cdot 10^{-6}$                                                                                                    | 50       | NA       | 4     | Dirichlet $\{V_P, 0\}$ , (Small intestine)                                         | Continuous<br>Robin<br>( $h = 10 \text{ W} \cdot \text{m}^{-2} \cdot ^\circ\text{C}^{-1}$ , $T_{\text{env}} = 20^\circ\text{C}$ ) | [59] |
| Rectangular plate                    | $20 \cdot 10^{-3} \times 10 \cdot 10^{-3}$ (Length $\times$ Width) | NA                                                          | Lateral     | 2      | $2 \cdot 10^{-3}$                                                                                                   | 800                                     | $100 \cdot 10^{-6}$                                                                                                   | 90       | NA       | 1     | Dirichlet $\{V_P/2, -V_P/2\}$                                                      | NR                                                                                                                                | [60] |
| Cylinder                             | $0.87 \cdot 10^{-3}$                                               | $1 \cdot 10^{-3}$                                           | Lateral     | 2      | $4.17 \cdot 10^{-3}$                                                                                                | 450                                     | $100 \cdot 10^{-6}$                                                                                                   | 50       | NA       | 1     | Dirichlet $\{V_P, 0\}$                                                             | Continuous                                                                                                                        | [61] |
| Cylinder                             | NR                                                                 | NR                                                          | Rectangular | 4      | $\{12 \cdot 10^{-3}, 14 \cdot 10^{-3}, 15 \cdot 10^{-3}, 17 \cdot 10^{-3}, 18 \cdot 10^{-3}\}$                      | [1540, 3000]                            | $90 \cdot 10^{-6}$                                                                                                    | {20, 70} | NR       | NR    | NR                                                                                 | NR                                                                                                                                | [62] |
| Cylinder                             | $1 \cdot 10^{-3}$                                                  | $10 \cdot 10^{-3}$                                          | Lateral     | 2      | $\{10 \cdot 10^{-3}, 15 \cdot 10^{-3}\}$                                                                            | {1250, 1750, 2250}                      | NA                                                                                                                    | NA       | NA       | NA    | Dirichlet $\{V_P, 0\}$                                                             | NTA                                                                                                                               | [63] |
| Cylinder                             | $1 \cdot 10^{-3}$                                                  | $\infty$                                                    | Lateral     | 2      | $1 \cdot 10^{-2}$                                                                                                   | {1500, 2000}                            | $100 \cdot 10^{-6}$                                                                                                   | 100      | NA       | 1     | Dirichlet $\{V_P, 0V\}$                                                            | NA                                                                                                                                | [64] |
| Monopolar needle                     | NR                                                                 | $10 \cdot 10^{-3}$                                          | Lateral     | 2      | $\{10 \cdot 10^{-3}, 15 \cdot 10^{-3}\}$                                                                            | {2000, 2250, 2500, 2700}                | NA                                                                                                                    | NA       | NA       | NA    | Dirichlet $\{V_P, 0\}$                                                             | NTA                                                                                                                               | [65] |
| Bipolar needle                       | NR                                                                 | NR                                                          | Lateral     | 2      | NR                                                                                                                  | {2400, 2700}                            | NA                                                                                                                    | NA       | NA       | NA    | Dirichlet $\{V_P, 0\}$                                                             | NTA                                                                                                                               | [65] |
| {Needle, External surface electrode} | NR                                                                 | NA                                                          | ND          | 2      | $29.3 \cdot 10^{-3}$                                                                                                | 600                                     | $50 \cdot 10^{-6}$                                                                                                    | 540      | NA       | 1     | Dirichlet $\{V_P, 0\}$                                                             | NR                                                                                                                                | [66] |

| Electrodes                                              |                                            |                                                                              |                                                   |                                          |                                                                              | Square pulse parameters |                                                             |               |          |       | Boundary conditions (BC) applied to boundaries between electrodes and medium (BEM) |                                                                                                        |      |
|---------------------------------------------------------|--------------------------------------------|------------------------------------------------------------------------------|---------------------------------------------------|------------------------------------------|------------------------------------------------------------------------------|-------------------------|-------------------------------------------------------------|---------------|----------|-------|------------------------------------------------------------------------------------|--------------------------------------------------------------------------------------------------------|------|
| Shape                                                   | $\emptyset$                                | L                                                                            | Geometry                                          | Number                                   | d                                                                            | $V_P$                   | $\tau_P$                                                    | $N_P$         | $\tau_P$ | $f_P$ | Type electrical BC at BEM                                                          | Type thermal BC at BEM                                                                                 | Ref. |
|                                                         | [m]                                        | [m]                                                                          |                                                   |                                          | [m]                                                                          | [V]                     | [s]                                                         |               | [s]      | [Hz]  |                                                                                    |                                                                                                        |      |
| Needle                                                  | NR                                         | NR                                                                           | NR                                                | {3, 4, 5}                                | $[10 \cdot 10^{-3}, 19 \cdot 10^{-3}]$                                       | [1650, 2850]            | NA                                                          | NA            | NA       | NA    | NR                                                                                 | NR                                                                                                     | [67] |
| Needle                                                  | $0.91 \cdot 10^{-3}$                       | $\{15 \cdot 10^{-3}, 20 \cdot 10^{-3}\}$                                     | NR                                                | {4, 6}                                   | NR                                                                           | NR                      | NTA                                                         | NTA           | NTA      | NTA   | Dirichlet ( $\{V_P, 0\}$ )                                                         | NTA                                                                                                    | [68] |
| Cylinder                                                | $1 \cdot 10^{-3}$                          | NR                                                                           | NR                                                | {2, 4, 6}                                | NR                                                                           | [500, 1000]             | NA                                                          | NA            | NA       | NA    | Dirichlet                                                                          | NTA                                                                                                    | [69] |
| Needle                                                  | NR                                         | NR                                                                           | ND                                                | 3                                        | NR                                                                           | NR                      | NR                                                          | {10, 90, 200} | NR       | NR    | Dirichlet ( $\{V_P, 0\}$ )                                                         | NR                                                                                                     | [70] |
| Cylinder                                                | $1 \cdot 10^{-3}$                          | $\{10 \cdot 10^{-3}, 15 \cdot 10^{-3}, 20 \cdot 10^{-3}, 25 \cdot 10^{-3}\}$ | {Lateral, Triangular, NC for 4 electrode numbers} | {2, 3, 4}                                | $\{10 \cdot 10^{-3}, 15 \cdot 10^{-3}, 20 \cdot 10^{-3}, 25 \cdot 10^{-3}\}$ | {2000, 2500, 3000}      | NA                                                          | NA            | NA       | NA    | Dirichlet                                                                          | NTA                                                                                                    | [71] |
| Circle                                                  | $0.2 \cdot 10^{-3}$                        | NA                                                                           | Lateral                                           | 2                                        | $2 \cdot 10^{-3}$                                                            | {150, 350, 500}         | $100 \cdot 10^{-6}$                                         | {8, 32, 64}   | NA       | NA    | Dirichlet ( $\{V_P, -V_P\}$ )                                                      | NTA                                                                                                    | [72] |
| Cylinder                                                | $1 \cdot 10^{-3}$                          | $15 \cdot 10^{-3}$                                                           | Lateral                                           | 2                                        | $20 \cdot 10^{-3}$                                                           | {1000, 2000, 3000}      | $50 \cdot 10^{-6}$                                          | 80            | NA       | 1     | Dirichlet ( $\{V_P, 0\}$ )                                                         | Neumann                                                                                                | [73] |
| Hollow cylinder                                         | $0.914 \cdot 10^{-3}$                      | NC                                                                           | Lateral                                           | 2                                        | $4 \cdot 10^{-3}$                                                            | 450                     | $100 \cdot 10^{-6}$                                         | 80            | NA       | 1     | Dirichlet ( $\{V_P, 0\}$ )                                                         | Neumann                                                                                                | [73] |
| {Needle, Needle with parylene coating on outer surface} | $1 \cdot 10^{-3}$                          | $8 \cdot 10^{-3}$                                                            | Lateral                                           | 2                                        | $11 \cdot 10^{-3}$                                                           | {1000, 1250, 1500}      | NTA                                                         | NTA           | NTA      | NTA   | Dirichlet ( $\{V_P, 0\}$ )                                                         | NTA                                                                                                    | [74] |
| Rectangular plate                                       | $0.15 \cdot 10^{-3}$                       | NA                                                                           | Lateral                                           | 1<br>(Use of symmetry, so technically 2) | $0.25 \cdot 10^{-3}$<br>(In case of 2 electrodes)                            | {50, 100}               | NA                                                          | NA            | NA       | NA    | Dirichlet ( $\{V_P/2, -V_P/2\}$ )                                                  | NTA                                                                                                    | [75] |
| {Inner cylinder, Outer ring (Dispersive ground pad)}    | $\{0.26 \cdot 10^{-3}, 15 \cdot 10^{-3}\}$ | NR                                                                           | Coaxial shape                                     | 2                                        | $7 \cdot 10^{-3}$                                                            | NR                      | $100 \cdot 10^{-6}$                                         | 100           | NA       | 1     | Dirichlet                                                                          | NR                                                                                                     | [76] |
| Needle-shaped multipolar electrode                      | $\{0.6 \cdot 10^{-3}, 3.2 \cdot 10^{-3}\}$ | $\{9 \cdot 10^{-3}, 9.8 \cdot 10^{-3}\}$                                     | NC                                                | 5                                        | $\{6.2 \cdot 10^{-3}, 10 \cdot 10^{-3}\}$                                    | {1500, 2000}            | NA                                                          | NA            | NA       | NA    | NR                                                                                 | NTA                                                                                                    | [77] |
| Cylinder                                                | $1 \cdot 10^{-3}$                          | NA                                                                           | Lateral                                           | 2                                        | $10 \cdot 10^{-3}$                                                           | 1000                    | $\{50 \cdot 10^{-6}, 75 \cdot 10^{-6}, 100 \cdot 10^{-6}\}$ | NA            | NA       | NA    | Dirichlet ( $\{V_P, 0\}$ )                                                         | NTA                                                                                                    | [78] |
| Needle                                                  | NR                                         | $25 \cdot 10^{-3}$                                                           | Triangular                                        | 3                                        | $20 \cdot 10^{-3}$                                                           | 3000                    | NA                                                          | NA            | NA       | NA    | {Dirichlet, Robin}                                                                 | NTA                                                                                                    | [79] |
| Bipolar hollow cylinder                                 | $2.5 \cdot 10^{-3}$                        | $10 \cdot 10^{-3}$                                                           | Lateral                                           | 2                                        | $18 \cdot 10^{-3}$                                                           | 2700                    | $100 \cdot 10^{-6}$                                         | 300           | NA       | 1.5   | Dirichlet                                                                          | Robin ( $30.01 \cdot 10^2 \text{ W} \cdot \text{m}^{-2} \cdot ^\circ\text{C}^{-1}$ , Cooled electrode) | [80] |
|                                                         |                                            |                                                                              |                                                   |                                          |                                                                              |                         |                                                             |               |          |       |                                                                                    | Continuous                                                                                             |      |

**Table A6.4**

Table A6.4 Data about surface areas of electric field, mild hyperthermia and thermal damage, maximum temperature increase, experimental pulses, and validated results and parameters obtained from the included studies. This table was arranged according to the reference number. The brackets “{ }” are defined as a set of elements, “[a, b]” is defined as the range between and including the values a and b assuming  $\{a, b\} \in \mathbb{R}$ , and “[a:c:b]” is defined as the range between and including the values a and b with step c assuming  $\{a, b, c\} \in \mathbb{R}$ . The following abbreviations are used: NR (Not reported), NA (Not applicable), NC (Not clear), NTA (No thermal analysis), and ND (Not defined). In case  $E_{IRE(th)}$  was defined as a range [a, b] assuming  $\{a, b\} \in \mathbb{R}$ , then the average of a and b was calculated and used to calculate the surface areas of electric field.

| Simulations of electric-field distribution |                       |          |        | Simulations of temperature distribution |               |        |                   |          |        |                                |                                                                                                                                       | Parameters for meta-analysis |                  |                  | Validation                                                     |                                  |     |
|--------------------------------------------|-----------------------|----------|--------|-----------------------------------------|---------------|--------|-------------------|----------|--------|--------------------------------|---------------------------------------------------------------------------------------------------------------------------------------|------------------------------|------------------|------------------|----------------------------------------------------------------|----------------------------------|-----|
| $S_{E-IRE(th)}$                            |                       |          |        | $S_{\Delta T13}$                        |               |        | $S_{\Delta T13}$  |          |        | $T_{init}$ and $T_{max}$ range | Additional Details                                                                                                                    | $S_{E-IRE(th), \Sigma}$      | $R_{\Delta T13}$ | $R_{\Delta T13}$ | Experimental Pulse Parameters ( $V_p, t_p, N_p, \tau_p, f_p$ ) | Parameters attempted to validate | Ref |
| Average $E_{IRE(th)}$                      | Size                  | Position | Number | Size                                    | Position      | Number | $S_{\Delta T13}$  | Position | Number |                                |                                                                                                                                       | [m <sup>2</sup> ]            | [%]              | [%]              | ([V], [s], [-], [s], [Hz])                                     |                                  |     |
| [V·m <sup>-1</sup> ]                       | [m <sup>2</sup> ]     |          |        | [m <sup>2</sup> ]                       |               |        | [m <sup>2</sup> ] |          |        | [°C]                           |                                                                                                                                       |                              |                  |                  |                                                                |                                  |     |
| 680·10 <sup>2</sup>                        | 8.80·10 <sup>-5</sup> | Center   | 1      | 0                                       | NA            | NA     | 0                 | NA       | NA     | [37, 40]                       | $\emptyset = 1 \cdot 10^{-3}$ m<br>$d = 10 \cdot 10^{-3}$ m<br>Electrodes number = 2<br>$V_p = 1331$ V<br>$t_p = 200 \cdot 10^{-6}$ s | 8.80·10 <sup>-5</sup>        | 0                | 0                | NA                                                             | NA                               | [3] |
| 680·10 <sup>2</sup>                        | 8.80·10 <sup>-5</sup> | Center   | 1      | 7.73·10 <sup>-7</sup>                   | {Left, Right} | 2      | 0                 | NA       | NA     | [37, 43]                       | $\emptyset = 1 \cdot 10^{-3}$ m<br>$d = 10 \cdot 10^{-3}$ m<br>Number = 2<br>$V_p = 1331$ V<br>$t_p = 400 \cdot 10^{-6}$ s            | 8.80·10 <sup>-5</sup>        | 1.76             | 0                | NA                                                             | NA                               | [3] |
| 680·10 <sup>2</sup>                        | 8.80·10 <sup>-5</sup> | Center   | 1      | 2.15·10 <sup>-6</sup>                   | {Left, Right} | 2      | 0                 | NA       | NA     | [37, 50]                       | $\emptyset = 1 \cdot 10^{-3}$ m<br>$d = 10 \cdot 10^{-3}$ m<br>Number = 2<br>$V_p = 1331$ V                                           | 8.80·10 <sup>-5</sup>        | 4.9              | 0                | NA                                                             | NA                               | [3] |

| Simulations of electric-field distribution   |                                              |                                              |                                              | Simulations of temperature distribution      |                                                  |                                              |                                              |                                                  |                                              |                                              |                                                                                                                                                  |                                              |                                              |                                              |                                                                                                                                                                                         |                                  |      |
|----------------------------------------------|----------------------------------------------|----------------------------------------------|----------------------------------------------|----------------------------------------------|--------------------------------------------------|----------------------------------------------|----------------------------------------------|--------------------------------------------------|----------------------------------------------|----------------------------------------------|--------------------------------------------------------------------------------------------------------------------------------------------------|----------------------------------------------|----------------------------------------------|----------------------------------------------|-----------------------------------------------------------------------------------------------------------------------------------------------------------------------------------------|----------------------------------|------|
| S <sub>E-IRE(th)</sub>                       |                                              |                                              |                                              | S <sub>3ΔT13</sub>                           |                                                  |                                              | S <sub>ΔT13</sub>                            |                                                  |                                              |                                              |                                                                                                                                                  | Parameters for meta-analysis                 |                                              |                                              | Validation                                                                                                                                                                              |                                  |      |
| Average E <sub>IRE(th)</sub>                 | Size                                         | Position                                     | Number                                       | Size                                         | Position                                         | Number                                       | S <sub>ΔT13</sub>                            | Position                                         | Number                                       | T <sub>init</sub> and T <sub>max</sub> range | Additional Details                                                                                                                               | S <sub>E-IRE(th),Σ</sub>                     | R <sub>3ΔT13</sub>                           | R <sub>ΔT13</sub>                            | Experimental Pulse Parameters (V <sub>P</sub> , t <sub>P</sub> , N <sub>P</sub> , τ <sub>P</sub> , f <sub>P</sub> )                                                                     | Parameters attempted to validate | Ref  |
| [V·m <sup>-1</sup> ]                         | [m <sup>2</sup> ]                            |                                              |                                              | [m <sup>2</sup> ]                            |                                                  |                                              | [m <sup>2</sup> ]                            |                                                  |                                              | [°C]                                         |                                                                                                                                                  | [m <sup>2</sup> ]                            | [%]                                          | [%]                                          | ([V], [s], [-], [s], [Hz])                                                                                                                                                              |                                  |      |
|                                              |                                              |                                              |                                              |                                              |                                                  |                                              |                                              |                                                  |                                              |                                              | t <sub>P</sub> = 800·10 <sup>-6</sup> s                                                                                                          |                                              |                                              |                                              |                                                                                                                                                                                         |                                  |      |
| 400·10 <sup>2</sup>                          | 4.83·10 <sup>-5</sup>                        | Central                                      | 1                                            | 1.11·10 <sup>-6</sup>                        | {Top left, Top right, Bottom left, Bottom right} | 4                                            | 3.89·10 <sup>-8</sup>                        | {Top left, Top right, Bottom left, Bottom right} | 4                                            | NA                                           | NA                                                                                                                                               | 4.83·10 <sup>-5</sup>                        | 9.19                                         | 0.32                                         | (400, 2000·10 <sup>-6</sup> , 1, NA, NA)                                                                                                                                                | {σ, E <sub>IRE(th)</sub> }       | [24] |
| NA (No 2D figures of E- and T-distributions) | NA (No 2D figures of E- and T-distributions) | NA (No 2D figures of E- and T-distributions) | NA (No 2D figures of E- and T-distributions) | NA (No 2D figures of E- and T-distributions) | NA (No 2D figures of E- and T-distributions)     | NA (No 2D figures of E- and T-distributions) | NA (No 2D figures of E- and T-distributions) | NA (No 2D figures of E- and T-distributions)     | NA (No 2D figures of E- and T-distributions) | [37, 37.5]                                   | V <sub>P</sub> = 1000 V<br>t <sub>P</sub> = 100·10 <sup>-6</sup> s<br>N <sub>P</sub> = 80<br>f <sub>P</sub> = 0.3 Hz<br>d = 4·10 <sup>-3</sup> m | NA (No 2D figures of E- and T-distributions) | NA (No 2D figures of E- and T-distributions) | NA (No 2D figures of E- and T-distributions) | {600, 1000}, {100·10 <sup>-6</sup> , 800·10 <sup>-6</sup> , 1000·10 <sup>-6</sup> }, {1, 8, (4 sets × 2 pulses), (16 sets × 4 pulses), (4 sets × 20 pulses)}, NA, {0.03, 0.3, 1, 5000}) | NA                               | [25] |
| NA (No 2D figures of E- and T-distributions) | NA (No 2D figures of E- and T-distributions) | NA (No 2D figures of E- and T-distributions) | NA (No 2D figures of E- and T-distributions) | NA (No 2D figures of E- and T-distributions) | NA (No 2D figures of E- and T-distributions)     | NA (No 2D figures of E- and T-distributions) | NA (No 2D figures of E- and T-distributions) | NA (No 2D figures of E- and T-distributions)     | NA (No 2D figures of E- and T-distributions) | [37, 38]                                     | V <sub>P</sub> = 1000 V<br>t <sub>P</sub> = 100·10 <sup>-6</sup> s<br>N <sub>P</sub> = 64<br>f <sub>P</sub> = 1 Hz<br>d = 4·10 <sup>-3</sup> m   | NA (No 2D figures of E- and T-distributions) | NA (No 2D figures of E- and T-distributions) | NA (No 2D figures of E- and T-distributions) | {600, 1000}, {100·10 <sup>-6</sup> , 800·10 <sup>-6</sup> , 1000·10 <sup>-6</sup> }, {1, 8, (4 sets × 2 pulses), (16 sets × 4 pulses), (4 sets × 20 pulses)}, NA, {0.03, 0.3, 1, 5000}) | NA                               | [25] |
| NA (No 2D figures of E- and T-distributions) | NA (No 2D figures of E- and T-distributions) | NA (No 2D figures of E- and T-distributions) | NA (No 2D figures of E- and T-distributions) | NA (No 2D figures of E- and T-distributions) | NA (No 2D figures of E- and T-distributions)     | NA (No 2D figures of E- and T-distributions) | NA (No 2D figures of E- and T-distributions) | NA (No 2D figures of E- and T-distributions)     | NA (No 2D figures of E- and T-distributions) | [37, 38]                                     | V <sub>P</sub> = 600 V<br>t <sub>P</sub> = 100·10 <sup>-6</sup> s<br>N <sub>P</sub> = 8<br>f <sub>P</sub> = 1 Hz<br>d = 3·10 <sup>-3</sup> m     | NA (No 2D figures of E- and T-distributions) | NA (No 2D figures of E- and T-distributions) | NA (No 2D figures of E- and T-distributions) | {600, 1000}, {100·10 <sup>-6</sup> , 800·10 <sup>-6</sup> , 1000·10 <sup>-6</sup> }, {1, 8, (4 sets × 2 pulses), (16 sets × 4                                                           | NA                               | [25] |

| Simulations of electric-field distribution   |                                              |                                              |                                              | Simulations of temperature distribution      |                                              |                                              |                                              |                                              |                                              |                                              |                                                                                                                                               |                                              |                                              |                                              |                                                                                                                                                                                         |                                                          |      |  |
|----------------------------------------------|----------------------------------------------|----------------------------------------------|----------------------------------------------|----------------------------------------------|----------------------------------------------|----------------------------------------------|----------------------------------------------|----------------------------------------------|----------------------------------------------|----------------------------------------------|-----------------------------------------------------------------------------------------------------------------------------------------------|----------------------------------------------|----------------------------------------------|----------------------------------------------|-----------------------------------------------------------------------------------------------------------------------------------------------------------------------------------------|----------------------------------------------------------|------|--|
| S <sub>E-IRE(th)</sub>                       |                                              |                                              |                                              | S <sub>3ΔT13</sub>                           |                                              |                                              | S <sub>ΔT13</sub>                            |                                              |                                              |                                              |                                                                                                                                               | Parameters for meta-analysis                 |                                              |                                              | Validation                                                                                                                                                                              |                                                          |      |  |
| Average E <sub>IRE(th)</sub>                 | Size                                         | Position                                     | Number                                       | Size                                         | Position                                     | Number                                       | S <sub>ΔT13</sub>                            | Position                                     | Number                                       | T <sub>init</sub> and T <sub>max</sub> range | Additional Details                                                                                                                            | S <sub>E-IRE(th),Σ</sub>                     | R <sub>3ΔT13</sub>                           | R <sub>ΔT13</sub>                            | Experimental Pulse Parameters (V <sub>p</sub> , t <sub>p</sub> , N <sub>p</sub> , τ <sub>p</sub> , f <sub>p</sub> )                                                                     | Parameters attempted to validate                         | Ref  |  |
| [V·m <sup>-1</sup> ]                         | [m <sup>2</sup> ]                            |                                              |                                              | [m <sup>2</sup> ]                            |                                              |                                              | [m <sup>2</sup> ]                            |                                              |                                              | [°C]                                         |                                                                                                                                               | [m <sup>2</sup> ]                            | [%]                                          | [%]                                          | ([V], [s], [-], [s], [Hz])                                                                                                                                                              |                                                          |      |  |
|                                              |                                              |                                              |                                              |                                              |                                              |                                              |                                              |                                              |                                              |                                              |                                                                                                                                               |                                              |                                              |                                              |                                                                                                                                                                                         | pulses), (4 sets ×20 pulses)), NA, {0.03, 0.3, 1, 5000}) |      |  |
| NA (No 2D figures of E- and T-distributions) | NA (No 2D figures of E- and T-distributions) | NA (No 2D figures of E- and T-distributions) | NA (No 2D figures of E- and T-distributions) | NA (No 2D figures of E- and T-distributions) | NA (No 2D figures of E- and T-distributions) | NA (No 2D figures of E- and T-distributions) | NA (No 2D figures of E- and T-distributions) | NA (No 2D figures of E- and T-distributions) | NA (No 2D figures of E- and T-distributions) | [37, 38]                                     | V <sub>p</sub> = 1000 V<br>t <sub>p</sub> = 100·10 <sup>-6</sup> s<br>N <sub>p</sub> = 8<br>f <sub>p</sub> = 1 Hz<br>d = 5·10 <sup>-3</sup> m | NA (No 2D figures of E- and T-distributions) | NA (No 2D figures of E- and T-distributions) | NA (No 2D figures of E- and T-distributions) | {(600, 1000), {100·10 <sup>-6</sup> , 800·10 <sup>-6</sup> , 1000·10 <sup>-6</sup> }, {1, 8, (4 sets × 2 pulses), (16 sets ×4 pulses)}, (4 sets ×20 pulses)), NA, {0.03, 0.3, 1, 5000}) | NA                                                       | [25] |  |
| NA (No 2D figures of E- and T-distributions) | NA (No 2D figures of E- and T-distributions) | NA (No 2D figures of E- and T-distributions) | NA (No 2D figures of E- and T-distributions) | NA (No 2D figures of E- and T-distributions) | NA (No 2D figures of E- and T-distributions) | NA (No 2D figures of E- and T-distributions) | NA (No 2D figures of E- and T-distributions) | NA (No 2D figures of E- and T-distributions) | NA (No 2D figures of E- and T-distributions) | [37, 39]                                     | V <sub>p</sub> = 600 V<br>t <sub>p</sub> = 800·10 <sup>-6</sup> s<br>N <sub>p</sub> = 1<br>f <sub>p</sub> = 1 Hz<br>d = 3·10 <sup>-3</sup> m  | NA (No 2D figures of E- and T-distributions) | NA (No 2D figures of E- and T-distributions) | NA (No 2D figures of E- and T-distributions) | {(600, 1000), {100·10 <sup>-6</sup> , 800·10 <sup>-6</sup> , 1000·10 <sup>-6</sup> }, {1, 8, (4 sets × 2 pulses), (16 sets ×4 pulses)}, (4 sets ×20 pulses)), NA, {0.03, 0.3, 1, 5000}) | NA                                                       | [25] |  |
| NA (No 2D figures of E- and T-distributions) | NA (No 2D figures of E- and T-distributions) | NA (No 2D figures of E- and T-distributions) | NA (No 2D figures of E- and T-distributions) | NA (No 2D figures of E- and T-distributions) | NA (No 2D figures of E- and T-distributions) | NA (No 2D figures of E- and T-distributions) | NA (No 2D figures of E- and T-distributions) | NA (No 2D figures of E- and T-distributions) | NA (No 2D figures of E- and T-distributions) | [37, 39]                                     | V <sub>p</sub> = 1000 V<br>t <sub>p</sub> = 800·10 <sup>-6</sup> s<br>N <sub>p</sub> = 1<br>f <sub>p</sub> = 1 Hz<br>d = 5·10 <sup>-3</sup> m | NA (No 2D figures of E- and T-distributions) | NA (No 2D figures of E- and T-distributions) | NA (No 2D figures of E- and T-distributions) | {(600, 1000), {100·10 <sup>-6</sup> , 800·10 <sup>-6</sup> , 1000·10 <sup>-6</sup> }, {1, 8, (4 sets × 2 pulses), (16 sets ×4 pulses)}, (4 sets ×20 pulses)), NA, {0.03, 0.3, 1, 5000}) | NA                                                       | [25] |  |

| Simulations of electric-field distribution   |                                              |                                              |                                              | Simulations of temperature distribution      |                                              |                                              |                                              |                                              |                                              |                                              |                                                                                                                                                   | Parameters for meta-analysis                 |                                              |                                              | Validation                                                                                                                                                                              |                                  |      |
|----------------------------------------------|----------------------------------------------|----------------------------------------------|----------------------------------------------|----------------------------------------------|----------------------------------------------|----------------------------------------------|----------------------------------------------|----------------------------------------------|----------------------------------------------|----------------------------------------------|---------------------------------------------------------------------------------------------------------------------------------------------------|----------------------------------------------|----------------------------------------------|----------------------------------------------|-----------------------------------------------------------------------------------------------------------------------------------------------------------------------------------------|----------------------------------|------|
| S <sub>E-IRE(th)</sub>                       |                                              |                                              |                                              | S <sub>3ΔT13</sub>                           |                                              |                                              | S <sub>ΔT13</sub>                            |                                              |                                              |                                              |                                                                                                                                                   | Parameters for meta-analysis                 |                                              |                                              | Validation                                                                                                                                                                              |                                  |      |
| Average E <sub>IRE(th)</sub>                 | Size                                         | Position                                     | Number                                       | Size                                         | Position                                     | Number                                       | S <sub>ΔT13</sub>                            | Position                                     | Number                                       | T <sub>init</sub> and T <sub>max</sub> range | Additional Details                                                                                                                                | S <sub>E-IRE(th),Σ</sub>                     | R <sub>3ΔT13</sub>                           | R <sub>ΔT13</sub>                            | Experimental Pulse Parameters (V <sub>P</sub> , t <sub>P</sub> , N <sub>P</sub> , τ <sub>P</sub> , f <sub>P</sub> )                                                                     | Parameters attempted to validate | Ref  |
| [V·m <sup>-1</sup> ]                         | [m <sup>2</sup> ]                            |                                              |                                              | [m <sup>2</sup> ]                            |                                              |                                              | [m <sup>2</sup> ]                            |                                              |                                              | [°C]                                         |                                                                                                                                                   | [m <sup>2</sup> ]                            | [%]                                          | [%]                                          | ([V], [s], [-], [s], [Hz])                                                                                                                                                              |                                  |      |
|                                              |                                              |                                              |                                              |                                              |                                              |                                              |                                              |                                              |                                              |                                              |                                                                                                                                                   |                                              |                                              |                                              | NA, {0.03, 0.3, 1, 5000})                                                                                                                                                               |                                  |      |
| NA (No 2D figures of E- and T-distributions) | NA (No 2D figures of E- and T-distributions) | NA (No 2D figures of E- and T-distributions) | NA (No 2D figures of E- and T-distributions) | NA (No 2D figures of E- and T-distributions) | NA (No 2D figures of E- and T-distributions) | NA (No 2D figures of E- and T-distributions) | NA (No 2D figures of E- and T-distributions) | NA (No 2D figures of E- and T-distributions) | NA (No 2D figures of E- and T-distributions) | [37, 40]                                     | V <sub>P</sub> = 1000 V<br>t <sub>P</sub> = 100·10 <sup>-6</sup> s<br>N <sub>P</sub> = 64<br>f <sub>P</sub> = 5000 Hz<br>d = 5·10 <sup>-3</sup> m | NA (No 2D figures of E- and T-distributions) | NA (No 2D figures of E- and T-distributions) | NA (No 2D figures of E- and T-distributions) | {(600, 1000), {100·10 <sup>-6</sup> , 800·10 <sup>-6</sup> , 1000·10 <sup>-6</sup> }, {1, 8, (4 sets × 2 pulses), (16 sets ×4 pulses), (4 sets ×20 pulses)}}, NA, {0.03, 0.3, 1, 5000}) | NA                               | [25] |
| NA (No 2D figures of E- and T-distributions) | NA (No 2D figures of E- and T-distributions) | NA (No 2D figures of E- and T-distributions) | NA (No 2D figures of E- and T-distributions) | NA (No 2D figures of E- and T-distributions) | NA (No 2D figures of E- and T-distributions) | NA (No 2D figures of E- and T-distributions) | NA (No 2D figures of E- and T-distributions) | NA (No 2D figures of E- and T-distributions) | NA (No 2D figures of E- and T-distributions) | [37, 40]                                     | V <sub>P</sub> = 1000 V<br>t <sub>P</sub> = 100·10 <sup>-6</sup> s<br>N <sub>P</sub> = 80<br>f <sub>P</sub> = 3 Hz<br>d = 4·10 <sup>-3</sup> m    | NA (No 2D figures of E- and T-distributions) | NA (No 2D figures of E- and T-distributions) | NA (No 2D figures of E- and T-distributions) | {(600, 1000), {100·10 <sup>-6</sup> , 800·10 <sup>-6</sup> , 1000·10 <sup>-6</sup> }, {1, 8, (4 sets × 2 pulses), (16 sets ×4 pulses), (4 sets ×20 pulses)}}, NA, {0.03, 0.3, 1, 5000}) | NA                               | [25] |
| NA (No 2D figures of E- and T-distributions) | NA (No 2D figures of E- and T-distributions) | NA (No 2D figures of E- and T-distributions) | NA (No 2D figures of E- and T-distributions) | NA (No 2D figures of E- and T-distributions) | NA (No 2D figures of E- and T-distributions) | NA (No 2D figures of E- and T-distributions) | NA (No 2D figures of E- and T-distributions) | NA (No 2D figures of E- and T-distributions) | NA (No 2D figures of E- and T-distributions) | [37, 40]                                     | V <sub>P</sub> = 1000 V<br>t <sub>P</sub> = 1000·10 <sup>-6</sup> s<br>N <sub>P</sub> = 8<br>f <sub>P</sub> = 0.03 Hz<br>d = 4·10 <sup>-3</sup> m | NA (No 2D figures of E- and T-distributions) | NA (No 2D figures of E- and T-distributions) | NA (No 2D figures of E- and T-distributions) | {(600, 1000), {100·10 <sup>-6</sup> , 800·10 <sup>-6</sup> , 1000·10 <sup>-6</sup> }, {1, 8, (4 sets × 2 pulses), (16 sets ×4 pulses), (4 sets ×20 pulses)}}, NA, {0.03, 0.3, 1, 5000}) | NA                               | [25] |

| Simulations of electric-field distribution    |                                               |                                               |                                               | Simulations of temperature distribution       |                                               |                                               |                                               |                                               |                                               |                                              |                                                                                                                                                   |                                               |                                               |                                               |                                                                                                                                                                                           |                                   |      |
|-----------------------------------------------|-----------------------------------------------|-----------------------------------------------|-----------------------------------------------|-----------------------------------------------|-----------------------------------------------|-----------------------------------------------|-----------------------------------------------|-----------------------------------------------|-----------------------------------------------|----------------------------------------------|---------------------------------------------------------------------------------------------------------------------------------------------------|-----------------------------------------------|-----------------------------------------------|-----------------------------------------------|-------------------------------------------------------------------------------------------------------------------------------------------------------------------------------------------|-----------------------------------|------|
| S <sub>E-IRE(th)</sub>                        |                                               |                                               |                                               | S <sub>ΔT13</sub>                             |                                               |                                               | S <sub>ΔT13</sub>                             |                                               |                                               |                                              |                                                                                                                                                   | Parameters for meta-analysis                  |                                               |                                               | Validation                                                                                                                                                                                |                                   |      |
| Average E <sub>IRE(th)</sub>                  | Size                                          | Position                                      | Number                                        | Size                                          | Position                                      | Number                                        | S <sub>ΔT13</sub>                             | Position                                      | Number                                        | T <sub>init</sub> and T <sub>max</sub> range | Additional Details                                                                                                                                | S <sub>E-IRE(th),Σ</sub>                      | R <sub>ΔT13</sub>                             | R <sub>ΔT13</sub>                             | Experiment al Pulse Parameters (V <sub>P</sub> , t <sub>P</sub> , N <sub>P</sub> , τ <sub>P</sub> , f <sub>P</sub> )                                                                      | Paramet ers attempted to validate | Re f |
| [V·m <sup>-1</sup> ]                          | [m <sup>2</sup> ]                             |                                               |                                               | [m <sup>2</sup> ]                             |                                               |                                               | [m <sup>2</sup> ]                             |                                               |                                               | [°C]                                         |                                                                                                                                                   | [m <sup>2</sup> ]                             | [%]                                           | [%]                                           | ( V , [s], [-], [s], [Hz])                                                                                                                                                                |                                   |      |
| NA (No 2D figures of E- and T-distribut ions) | NA (No 2D figures of E- and T-distributi ons) | NA (No 2D figures of E- and T-distributi ons) | NA (No 2D figures of E- and T-distributi ons) | NA (No 2D figures of E- and T-distributi ons) | NA (No 2D figures of E- and T-distributi ons) | NA (No 2D figures of E- and T-distributi ons) | NA (No 2D figures of E- and T-distributi ons) | NA (No 2D figures of E- and T-distributi ons) | NA (No 2D figures of E- and T-distributi ons) | [37, 41]                                     | V <sub>P</sub> = 1000 V<br>τ <sub>P</sub> = 100·10 <sup>-6</sup> s<br>N <sub>P</sub> = 64<br>f <sub>P</sub> = 5000 Hz<br>d = 4·10 <sup>-3</sup> m | NA (No 2D figures of E- and T-distributi ons) | NA (No 2D figures of E- and T-distributi ons) | NA (No 2D figures of E- and T-distributi ons) | {(600, 1000), {100·10 <sup>-6</sup> , 800·10 <sup>-6</sup> , 1000·10 <sup>-6</sup> }, {1, 8, (4 sets × 2 pulses), (16 sets ×4 pulses), (4 sets ×20 pulses)}}, NA, {0.03, 0.3, 1, 5000})   | NA                                | [25] |
| NA (No 2D figures of E- and T-distribut ions) | NA (No 2D figures of E- and T-distributi ons) | NA (No 2D figures of E- and T-distributi ons) | NA (No 2D figures of E- and T-distributi ons) | NA (No 2D figures of E- and T-distributi ons) | NA (No 2D figures of E- and T-distributi ons) | NA (No 2D figures of E- and T-distributi ons) | NA (No 2D figures of E- and T-distributi ons) | NA (No 2D figures of E- and T-distributi ons) | NA (No 2D figures of E- and T-distributi ons) | [37, 43]                                     | V <sub>P</sub> = 1000 V<br>τ <sub>P</sub> = 800·10 <sup>-6</sup> s<br>N <sub>P</sub> = 8, f <sub>P</sub> = 1 Hz<br>d = 5·10 <sup>-3</sup> m       | NA (No 2D figures of E- and T-distributi ons) | NA (No 2D figures of E- and T-distributi ons) | NA (No 2D figures of E- and T-distributi ons) | {(600, 1000), {100·10 <sup>-6</sup> , 800·10 <sup>-6</sup> , 1000·10 <sup>-6</sup> }, {1, 8, (4 sets × 2 pulses), (16 sets ×4 pulses), (4 sets ×20 pulses)}}, NA, {0.03, 0.3, 1, 5000})   | NA                                | [25] |
| NA (No 2D figures of E- and T-distribut ions) | NA (No 2D figures of E- and T-distributi ons) | NA (No 2D figures of E- and T-distributi ons) | NA (No 2D figures of E- and T-distributi ons) | NA (No 2D figures of E- and T-distributi ons) | NA (No 2D figures of E- and T-distributi ons) | NA (No 2D figures of E- and T-distributi ons) | NA (No 2D figures of E- and T-distributi ons) | NA (No 2D figures of E- and T-distributi ons) | NA (No 2D figures of E- and T-distributi ons) | [37, 46]                                     | V <sub>P</sub> = 1000 V<br>τ <sub>P</sub> = 800·10 <sup>-6</sup> s<br>N <sub>P</sub> = 8<br>f <sub>P</sub> = 1 Hz<br>d = 4·10 <sup>-3</sup> m     | NA (No 2D figures of E- and T-distributi ons) | NA (No 2D figures of E- and T-distributi ons) | NA (No 2D figures of E- and T-distributi ons) | {(600, 1000), {100·10 <sup>-6</sup> , 800·10 <sup>-6</sup> , 1000·10 <sup>-6</sup> }, {1, 8, (4 sets × 2 pulses), (16 sets ×4 pulses), (4 sets ×20 pulses)}}, NA, {0.03, 0.3, 1, 5000})   | NA                                | [25] |
| NA (No 2D figures of E- and T-distribut ions) | NA (No 2D figures of E- and T-distributi ons) | NA (No 2D figures of E- and T-distributi ons) | NA (No 2D figures of E- and T-distributi ons) | NA (No 2D figures of E- and T-distributi ons) | NA (No 2D figures of E- and T-distributi ons) | NA (No 2D figures of E- and T-distributi ons) | NA (No 2D figures of E- and T-distributi ons) | NA (No 2D figures of E- and T-distributi ons) | NA (No 2D figures of E- and T-distributi ons) | [37, 51]                                     | V <sub>P</sub> = 1000 V                                                                                                                           | NA (No 2D figures of E- and T-distributi ons) | NA (No 2D figures of E- and T-distributi ons) | NA (No 2D figures of E- and T-distributi ons) | {(600, 1000), {100·10 <sup>-6</sup> , 800·10 <sup>-6</sup> , 1000·10 <sup>-6</sup> }, {1, 8, (4 sets × 2 pulses), (16 sets ×4 pulses), (4 sets ×20 pulses)}}, NA, {100·10 <sup>-6</sup> , | NA                                | [25] |

| Simulations of electric-field distribution |                                     |                                     |                                     | Simulations of temperature distribution |                                     |                                     |                                     |                                     |                                     |                                              |                                                                                                                       |                                     |                                     |                                     |                                                                                                                                                   |                                  |      |
|--------------------------------------------|-------------------------------------|-------------------------------------|-------------------------------------|-----------------------------------------|-------------------------------------|-------------------------------------|-------------------------------------|-------------------------------------|-------------------------------------|----------------------------------------------|-----------------------------------------------------------------------------------------------------------------------|-------------------------------------|-------------------------------------|-------------------------------------|---------------------------------------------------------------------------------------------------------------------------------------------------|----------------------------------|------|
| S <sub>E-IRE(th)</sub>                     |                                     |                                     |                                     | S <sub>3ΔT13</sub>                      |                                     |                                     | S <sub>ΔT13</sub>                   |                                     |                                     | T <sub>init</sub> and T <sub>max</sub> range | Additional Details                                                                                                    | Parameters for meta-analysis        |                                     |                                     | Validation                                                                                                                                        |                                  |      |
| Average E <sub>IRE(th)</sub>               | Size                                | Position                            | Number                              | Size                                    | Position                            | Number                              | S <sub>ΔT13</sub>                   | Position                            | Number                              |                                              |                                                                                                                       | S <sub>E-IRE(th),Σ</sub>            | R <sub>3ΔT13</sub>                  | R <sub>ΔT13</sub>                   | Experimental Pulse Parameters (V <sub>p</sub> , t <sub>p</sub> , N <sub>p</sub> , τ <sub>p</sub> , f <sub>p</sub> )                               | Parameters attempted to validate | Ref  |
| [V·m <sup>-1</sup> ]                       | [m <sup>2</sup> ]                   |                                     |                                     | [m <sup>2</sup> ]                       |                                     |                                     | [m <sup>2</sup> ]                   |                                     |                                     | [°C]                                         |                                                                                                                       | [m <sup>2</sup> ]                   | [%]                                 | [%]                                 | ([V], [s], [-], [s], [Hz])                                                                                                                        |                                  |      |
| of E- and T-distributions)                 | E- and T-distributions)             | E- and T-distributions)             | E- and T-distributions)             | E- and T-distributions)                 | E- and T-distributions)             | E- and T-distributions)             | E- and T-distributions)             | E- and T-distributions)             | E- and T-distributions)             |                                              | t <sub>p</sub> = 1000·10 <sup>-6</sup> s<br>N <sub>p</sub> = 8<br>f <sub>p</sub> = 0.3 Hz<br>d = 4·10 <sup>-3</sup> m | E- and T-distributions)             | E- and T-distributions)             | E- and T-distributions)             | 800·10 <sup>-6</sup> , 1000·10 <sup>-6</sup> , {1, 8, (4 sets × 2 pulses), (16 sets × 4 pulses), (4 sets × 20 pulses)}, NA, {0.03, 0.3, 1, 5000}) |                                  |      |
| NA (No 2D figure of T-distribution)        | NA (No 2D figure of T-distribution) | NA (No 2D figure of T-distribution) | NA (No 2D figure of T-distribution) | NA (No 2D figure of T-distribution)     | NA (No 2D figure of T-distribution) | NA (No 2D figure of T-distribution) | NA (No 2D figure of T-distribution) | NA (No 2D figure of T-distribution) | NA (No 2D figure of T-distribution) | [37, 37.7]                                   | Shape cylinder<br>Ø = 0.5·10 <sup>-3</sup> m<br>d = 10·10 <sup>-3</sup> m<br>V <sub>p</sub> = 1000 2D ND tissue 1     | NA (No 2D figure of T-distribution) | NA (No 2D figure of T-distribution) | NA (No 2D figure of T-distribution) | NA                                                                                                                                                | NA                               | [26] |
| NA (No 2D figure of T-distribution)        | NA (No 2D figure of T-distribution) | NA (No 2D figure of T-distribution) | NA (No 2D figure of T-distribution) | NA (No 2D figure of T-distribution)     | NA (No 2D figure of T-distribution) | NA (No 2D figure of T-distribution) | NA (No 2D figure of T-distribution) | NA (No 2D figure of T-distribution) | NA (No 2D figure of T-distribution) | [37, 37.6]                                   | Shape cylinder<br>Ø = 1·10 <sup>-3</sup> m<br>d = 10·10 <sup>-3</sup> m<br>V <sub>p</sub> = 1000 2D ND tissue 1       | NA (No 2D figure of T-distribution) | NA (No 2D figure of T-distribution) | NA (No 2D figure of T-distribution) | NA                                                                                                                                                | NA                               | [26] |
| NA (No 2D figure of T-distribution)        | NA (No 2D figure of T-distribution) | NA (No 2D figure of T-distribution) | NA (No 2D figure of T-distribution) | NA (No 2D figure of T-distribution)     | NA (No 2D figure of T-distribution) | NA (No 2D figure of T-distribution) | NA (No 2D figure of T-distribution) | NA (No 2D figure of T-distribution) | NA (No 2D figure of T-distribution) | [37, 37.4]                                   | Shape cylinder<br>Ø = 2·10 <sup>-3</sup> m<br>d = 10·10 <sup>-3</sup> m<br>V <sub>p</sub> = 1000 2D ND tissue 1       | NA (No 2D figure of T-distribution) | NA (No 2D figure of T-distribution) | NA (No 2D figure of T-distribution) | NA                                                                                                                                                | NA                               | [26] |
| NR                                         | NA (E <sub>IRE(th)</sub> NR)            | NA (E <sub>IRE(th)</sub> NR)        | NA (E <sub>IRE(th)</sub> NR)        | NA (E <sub>IRE(th)</sub> NR)        | NA (E <sub>IRE(th)</sub> NR)        | NA (E <sub>IRE(th)</sub> NR)        | [37, 50]                                     | (Shape: Sphere; V <sub>p</sub> = 500 V; t <sub>p</sub> =                                                              | NA (E <sub>IRE(th)</sub> NR)        | NA (E <sub>IRE(th)</sub> NR)        | NA (E <sub>IRE(th)</sub> NR)        | NA                                                                                                                                                | NA                               | [27] |



| Simulations of electric-field distribution |                           |                           |                           | Simulations of temperature distribution |                           |                           |                           |                           |                           |                                |                                                                   | Parameters for meta-analysis |                           |                           | Validation                                                                 |                                  |      |
|--------------------------------------------|---------------------------|---------------------------|---------------------------|-----------------------------------------|---------------------------|---------------------------|---------------------------|---------------------------|---------------------------|--------------------------------|-------------------------------------------------------------------|------------------------------|---------------------------|---------------------------|----------------------------------------------------------------------------|----------------------------------|------|
| $S_{E-IRE(th)}$                            |                           |                           |                           | $S_{3\Delta T13}$                       |                           |                           | $S_{\Delta T13}$          |                           |                           | $T_{init}$ and $T_{max}$ range | Additional Details                                                | $S_{E-IRE(th),\Sigma}$       | $R_{3\Delta T13}$         | $R_{\Delta T13}$          | Experimental Pulse Parameters ( $V_P$ , $t_P$ , $N_P$ , $\tau_P$ , $f_P$ ) | Parameters attempted to validate | Ref  |
| Average $E_{IRE(th)}$                      | Size                      | Position                  | Number                    | Size                                    | Position                  | Number                    | $S_{\Delta T13}$          | Position                  | Number                    |                                |                                                                   |                              |                           |                           |                                                                            |                                  |      |
| $[V \cdot m^{-1}]$                         | $[m^2]$                   |                           |                           | $[m^2]$                                 |                           |                           | $[m^2]$                   |                           |                           | $[^{\circ}C]$                  |                                                                   | $[m^2]$                      | $[\%]$                    | $[\%]$                    | $[(V), [s], [-], [s], [Hz]]$                                               |                                  |      |
|                                            |                           |                           |                           |                                         |                           |                           |                           |                           |                           |                                | $864 \cdot 10^{-6} s$                                             |                              |                           |                           |                                                                            |                                  |      |
| NR                                         | NA<br>( $E_{IRE(th)}$ NR) | NA<br>( $E_{IRE(th)}$ NR) | NA<br>( $E_{IRE(th)}$ NR) | NA<br>( $E_{IRE(th)}$ NR)               | NA<br>( $E_{IRE(th)}$ NR) | NA<br>( $E_{IRE(th)}$ NR) | NA<br>( $E_{IRE(th)}$ NR) | NA<br>( $E_{IRE(th)}$ NR) | NA<br>( $E_{IRE(th)}$ NR) | [37, 50]                       | (Shape: Sphere; $V_P = 1000 V$ ; $t_P = 242 \cdot 10^{-6} s$ )    | NA<br>( $E_{IRE(th)}$ NR)    | NA<br>( $E_{IRE(th)}$ NR) | NA<br>( $E_{IRE(th)}$ NR) | NA                                                                         | NA                               | [27] |
| NR                                         | NA<br>( $E_{IRE(th)}$ NR) | NA<br>( $E_{IRE(th)}$ NR) | NA<br>( $E_{IRE(th)}$ NR) | NA<br>( $E_{IRE(th)}$ NR)               | NA<br>( $E_{IRE(th)}$ NR) | NA<br>( $E_{IRE(th)}$ NR) | NA<br>( $E_{IRE(th)}$ NR) | NA<br>( $E_{IRE(th)}$ NR) | NA<br>( $E_{IRE(th)}$ NR) | [37, 50]                       | (Shape: Sphere; $V_P = 2000 V$ ; $t_P = 51.6 \cdot 10^{-6} s$ )   | NA<br>( $E_{IRE(th)}$ NR)    | NA<br>( $E_{IRE(th)}$ NR) | NA<br>( $E_{IRE(th)}$ NR) | NA                                                                         | NA                               | [27] |
| NR                                         | NA<br>( $E_{IRE(th)}$ NR) | NA<br>( $E_{IRE(th)}$ NR) | NA<br>( $E_{IRE(th)}$ NR) | NA<br>( $E_{IRE(th)}$ NR)               | NA<br>( $E_{IRE(th)}$ NR) | NA<br>( $E_{IRE(th)}$ NR) | NA<br>( $E_{IRE(th)}$ NR) | NA<br>( $E_{IRE(th)}$ NR) | NA<br>( $E_{IRE(th)}$ NR) | [37, 50]                       | (Shape: Cylinder; $V_P = 500 V$ ; $t_P = 8960 \cdot 10^{-6} s$ )  | NA<br>( $E_{IRE(th)}$ NR)    | NA<br>( $E_{IRE(th)}$ NR) | NA<br>( $E_{IRE(th)}$ NR) | NA                                                                         | NA                               | [27] |
| NR                                         | NA<br>( $E_{IRE(th)}$ NR) | NA<br>( $E_{IRE(th)}$ NR) | NA<br>( $E_{IRE(th)}$ NR) | NA<br>( $E_{IRE(th)}$ NR)               | NA<br>( $E_{IRE(th)}$ NR) | NA<br>( $E_{IRE(th)}$ NR) | NA<br>( $E_{IRE(th)}$ NR) | NA<br>( $E_{IRE(th)}$ NR) | NA<br>( $E_{IRE(th)}$ NR) | [37, 50]                       | (Shape: Cylinder; $V_P = 1000 V$ ; $t_P = 2110 \cdot 10^{-6} s$ ) | NA<br>( $E_{IRE(th)}$ NR)    | NA<br>( $E_{IRE(th)}$ NR) | NA<br>( $E_{IRE(th)}$ NR) | NA                                                                         | NA                               | [27] |
| NR                                         | NA<br>( $E_{IRE(th)}$ NR) | NA<br>( $E_{IRE(th)}$ NR) | NA<br>( $E_{IRE(th)}$ NR) | NA<br>( $E_{IRE(th)}$ NR)               | NA<br>( $E_{IRE(th)}$ NR) | NA<br>( $E_{IRE(th)}$ NR) | NA<br>( $E_{IRE(th)}$ NR) | NA<br>( $E_{IRE(th)}$ NR) | NA<br>( $E_{IRE(th)}$ NR) | [37, 50]                       | (Shape: Cylinder; $V_P = 2000 V$ ; $t_P = 510 \cdot 10^{-6} s$ )  | NA<br>( $E_{IRE(th)}$ NR)    | NA<br>( $E_{IRE(th)}$ NR) | NA<br>( $E_{IRE(th)}$ NR) | NA                                                                         | NA                               | [27] |
| NR                                         | NA<br>( $E_{IRE(th)}$ NR) | NA<br>( $E_{IRE(th)}$ NR) | NA<br>( $E_{IRE(th)}$ NR) | NA<br>( $E_{IRE(th)}$ NR)               | NA<br>( $E_{IRE(th)}$ NR) | NA<br>( $E_{IRE(th)}$ NR) | NA<br>( $E_{IRE(th)}$ NR) | NA<br>( $E_{IRE(th)}$ NR) | NA<br>( $E_{IRE(th)}$ NR) | [37, 50]                       | (Shape: Plate; $V_P = 500 V$ ; $t_P = 104000 \cdot 10^{-6} s$ )   | NA<br>( $E_{IRE(th)}$ NR)    | NA<br>( $E_{IRE(th)}$ NR) | NA<br>( $E_{IRE(th)}$ NR) | NA                                                                         | NA                               | [27] |
| NR                                         | NA<br>( $E_{IRE(th)}$ NR) | NA<br>( $E_{IRE(th)}$ NR) | NA<br>( $E_{IRE(th)}$ NR) | NA<br>( $E_{IRE(th)}$ NR)               | NA<br>( $E_{IRE(th)}$ NR) | NA<br>( $E_{IRE(th)}$ NR) | NA<br>( $E_{IRE(th)}$ NR) | NA<br>( $E_{IRE(th)}$ NR) | NA<br>( $E_{IRE(th)}$ NR) | [37, 50]                       | (Shape: Plate; $V_P = 1000 V$ ; $t_P = 25600 \cdot 10^{-6} s$ )   | NA<br>( $E_{IRE(th)}$ NR)    | NA<br>( $E_{IRE(th)}$ NR) | NA<br>( $E_{IRE(th)}$ NR) | NA                                                                         | NA                               | [27] |

| Simulations of electric-field distribution |                                     |                                     |                                     | Simulations of temperature distribution |                                     |                                     |                                     |                                     |                                     |                                              |                                                                                   |                                     |                                     |                                     |                                                                                                                     |                                  |      |
|--------------------------------------------|-------------------------------------|-------------------------------------|-------------------------------------|-----------------------------------------|-------------------------------------|-------------------------------------|-------------------------------------|-------------------------------------|-------------------------------------|----------------------------------------------|-----------------------------------------------------------------------------------|-------------------------------------|-------------------------------------|-------------------------------------|---------------------------------------------------------------------------------------------------------------------|----------------------------------|------|
| S <sub>E-IRE(th)</sub>                     |                                     |                                     |                                     | S <sub>3ΔT13</sub>                      |                                     |                                     | S <sub>ΔT13</sub>                   |                                     |                                     |                                              |                                                                                   | Parameters for meta-analysis        |                                     |                                     | Validation                                                                                                          |                                  |      |
| Average E <sub>IRE(th)</sub>               | Size                                | Position                            | Number                              | Size                                    | Position                            | Number                              | S <sub>ΔT13</sub>                   | Position                            | Number                              | T <sub>init</sub> and T <sub>max</sub> range | Additional Details                                                                | S <sub>E-IRE(th),Σ</sub>            | R <sub>3ΔT13</sub>                  | R <sub>ΔT13</sub>                   | Experimental Pulse Parameters (V <sub>P</sub> , t <sub>P</sub> , N <sub>P</sub> , τ <sub>P</sub> , f <sub>P</sub> ) | Parameters attempted to validate | Ref  |
| [V·m <sup>-1</sup> ]                       | [m <sup>2</sup> ]                   |                                     |                                     | [m <sup>2</sup> ]                       |                                     |                                     | [m <sup>2</sup> ]                   |                                     |                                     | [°C]                                         |                                                                                   | [m <sup>2</sup> ]                   | [%]                                 | [%]                                 | ( V ,  s , [-],  s , [Hz])                                                                                          |                                  |      |
| NR                                         | NA (E <sub>IRE(th)</sub> NR)            | NA (E <sub>IRE(th)</sub> NR)        | NA (E <sub>IRE(th)</sub> NR)        | NA (E <sub>IRE(th)</sub> NR)        | NA (E <sub>IRE(th)</sub> NR)        | NA (E <sub>IRE(th)</sub> NR)        | [37, 50]                                     | (Shape: Plate; V <sub>P</sub> = 2000 V; τ <sub>P</sub> = 8000·10 <sup>-6</sup> s) | NA (E <sub>IRE(th)</sub> NR)        | NA (E <sub>IRE(th)</sub> NR)        | NA (E <sub>IRE(th)</sub> NR)        | NA                                                                                                                  | NA                               | [27] |
| NA (2D figures NC)                         | NA (2D figures NC)                  | NA (2D figures NC)                  | NA (2D figures NC)                  | NA (2D figures NC)                      | NA (2D figures NC)                  | NA (2D figures NC)                  | NA (2D figures NC)                  | NA (2D figures NC)                  | NA (2D figures NC)                  | [37.08, 41.8]                                | Homogeneous prostate                                                              | NA (2D figures NC)                  | NA (2D figures NC)                  | NA (2D figures NC)                  | NA                                                                                                                  | NA                               | [28] |
| NA (2D figures NC)                         | NA (2D figures NC)                  | NA (2D figures NC)                  | NA (2D figures NC)                  | NA (2D figures NC)                      | NA (2D figures NC)                  | NA (2D figures NC)                  | NA (2D figures NC)                  | NA (2D figures NC)                  | NA (2D figures NC)                  | [37.08, 41.82]                               | Prostate including axon and myelin                                                | NA (2D figures NC)                  | NA (2D figures NC)                  | NA (2D figures NC)                  | NA                                                                                                                  | NA                               | [28] |
| NA (2D figures NC)                         | NA (2D figures NC)                  | NA (2D figures NC)                  | NA (2D figures NC)                  | NA (2D figures NC)                      | NA (2D figures NC)                  | NA (2D figures NC)                  | NA (2D figures NC)                  | NA (2D figures NC)                  | NA (2D figures NC)                  | [37.08, 41.35]                               | Prostate including blood vessel                                                   | NA (2D figures NC)                  | NA (2D figures NC)                  | NA (2D figures NC)                  | NA                                                                                                                  | NA                               | [28] |
| NA (2D figures NC)                         | NA (2D figures NC)                  | NA (2D figures NC)                  | NA (2D figures NC)                  | NA (2D figures NC)                      | NA (2D figures NC)                  | NA (2D figures NC)                  | NA (2D figures NC)                  | NA (2D figures NC)                  | NA (2D figures NC)                  | [37.08, 37.5]                                | Homogeneous fatty breast                                                          | NA (2D figures NC)                  | NA (2D figures NC)                  | NA (2D figures NC)                  | NA                                                                                                                  | NA                               | [28] |
| NA (2D figures NC)                         | NA (2D figures NC)                  | NA (2D figures NC)                  | NA (2D figures NC)                  | NA (2D figures NC)                      | NA (2D figures NC)                  | NA (2D figures NC)                  | NA (2D figures NC)                  | NA (2D figures NC)                  | NA (2D figures NC)                  | [37.08, 37.35]                               | Fatty breast tissue including breast gland and myoeptihelial cells                | NA (2D figures NC)                  | NA (2D figures NC)                  | NA (2D figures NC)                  | NA                                                                                                                  | NA                               | [28] |
| NA (No 2D figure of T-distribution)        | NA (No 2D figure of T-distribution) | NA (No 2D figure of T-distribution) | NA (No 2D figure of T-distribution) | NA (No 2D figure of T-distribution)     | NA (No 2D figure of T-distribution) | NA (No 2D figure of T-distribution) | NA (No 2D figure of T-distribution) | NA (No 2D figure of T-distribution) | NA (No 2D figure of T-distribution) | NA (σ for both tissues NR)                   | NA                                                                                | NA (No 2D figure of T-distribution) | NA (No 2D figure of T-distribution) | NA (No 2D figure of T-distribution) | (NR, 100·10 <sup>-6</sup> , 80, NA, 1)                                                                              | E <sub>IRE(th)</sub>             | [29] |
| NA                                         | NA                                  | NA                                  | NA                                  | NA                                      | NA                                  | NA                                  | NA                                  | NA                                  | NA                                  | NR                                           | NA                                                                                | NA                                  | NA                                  | NA                                  | {200, 300, 500, 800, 1500}, {100, 350, 500, 750, 1000, 2000, 5000}, 1, NA, NA)                                      | NA                               | [30] |

| Simulations of electric-field distribution |                                     |                                     |                                     | Simulations of temperature distribution |                                     |                                     |                                     |                                     |                                     |                                              |                                                                                                                                           |                                     |                                     |                                     |                                                                                                                     |                                  |      |
|--------------------------------------------|-------------------------------------|-------------------------------------|-------------------------------------|-----------------------------------------|-------------------------------------|-------------------------------------|-------------------------------------|-------------------------------------|-------------------------------------|----------------------------------------------|-------------------------------------------------------------------------------------------------------------------------------------------|-------------------------------------|-------------------------------------|-------------------------------------|---------------------------------------------------------------------------------------------------------------------|----------------------------------|------|
| S <sub>E-IRE(th)</sub>                     |                                     |                                     |                                     | S <sub>3ΔT13</sub>                      |                                     |                                     | S <sub>ΔT13</sub>                   |                                     |                                     |                                              |                                                                                                                                           | Parameters for meta-analysis        |                                     |                                     | Validation                                                                                                          |                                  |      |
| Average E <sub>IRE(th)</sub>               | Size                                | Position                            | Number                              | Size                                    | Position                            | Number                              | S <sub>ΔT13</sub>                   | Position                            | Number                              | T <sub>init</sub> and T <sub>max</sub> range | Additional Details                                                                                                                        | S <sub>E-IRE(th),Σ</sub>            | R <sub>3ΔT13</sub>                  | R <sub>ΔT13</sub>                   | Experimental Pulse Parameters (V <sub>P</sub> , t <sub>P</sub> , N <sub>P</sub> , τ <sub>P</sub> , f <sub>P</sub> ) | Parameters attempted to validate | Ref  |
| [V·m <sup>-1</sup> ]                       | [m <sup>2</sup> ]                   |                                     |                                     | [m <sup>2</sup> ]                       |                                     |                                     | [m <sup>2</sup> ]                   |                                     |                                     | [°C]                                         |                                                                                                                                           | [m <sup>2</sup> ]                   | [%]                                 | [%]                                 | ( V , [s], [-], [s], [Hz])                                                                                          |                                  |      |
| 510·10 <sup>2</sup>                        | 6.97·10 <sup>-5</sup>               | Center                              | 1                                   | 6.18·10 <sup>-5</sup>                   | Center                              | 1                                   | 6.14·10 <sup>-6</sup>               | Center                              | 1                                   | [37, 52]                                     | (V <sub>P</sub> = 1000 V)                                                                                                                 | 6.97·10 <sup>-5</sup>               | 88.67                               | 8.81                                | {500, 1000}, 50·10 <sup>-6</sup> , 9×10 Pulses, 4)<br>(Sets were separated by 1s)                                   | E <sub>IRE(th)</sub>             | [31] |
| NR                                         | NTA                                 | NTA                                 | NTA                                 | NTA                                     | NTA                                 | NTA                                 | NTA                                 | NTA                                 | NTA                                 | NTA                                          | NA                                                                                                                                        | NTA                                 | NTA                                 | NTA                                 | NA                                                                                                                  | NA                               | [32] |
| NA (No 2D figure of T-distribution)        | NA (No 2D figure of T-distribution) | NA (No 2D figure of T-distribution) | NA (No 2D figure of T-distribution) | NA (No 2D figure of T-distribution)     | NA (No 2D figure of T-distribution) | NA (No 2D figure of T-distribution) | NA (No 2D figure of T-distribution) | NA (No 2D figure of T-distribution) | NA (No 2D figure of T-distribution) | [37, 66.8]                                   | NA                                                                                                                                        | NA (No 2D figure of T-distribution) | NA (No 2D figure of T-distribution) | NA (No 2D figure of T-distribution) | (600, 100·10 <sup>-6</sup> , 90, NA, 4)                                                                             | NA                               | [33] |
| NA (No 2D figure of T-distribution)        | NA (No 2D figure of T-distribution) | NA (No 2D figure of T-distribution) | NA (No 2D figure of T-distribution) | NA (No 2D figure of T-distribution)     | NA (No 2D figure of T-distribution) | NA (No 2D figure of T-distribution) | NA (No 2D figure of T-distribution) | NA (No 2D figure of T-distribution) | NA (No 2D figure of T-distribution) | [37,66.7]                                    | V <sub>P</sub> = 600 V<br>f <sub>P</sub> = 4 Hz<br>σ = 0.6 S·m <sup>-1</sup><br>w <sub>b</sub> = 0.5 kg·m <sup>-3</sup> ·s <sup>-1</sup>  | NA (No 2D figure of T-distribution) | NA (No 2D figure of T-distribution) | NA (No 2D figure of T-distribution) | NA                                                                                                                  | NA                               | [34] |
| NA (No 2D figure of T-distribution)        | NA (No 2D figure of T-distribution) | NA (No 2D figure of T-distribution) | NA (No 2D figure of T-distribution) | NA (No 2D figure of T-distribution)     | NA (No 2D figure of T-distribution) | NA (No 2D figure of T-distribution) | NA (No 2D figure of T-distribution) | NA (No 2D figure of T-distribution) | NA (No 2D figure of T-distribution) | [37, 58]                                     | V <sub>P</sub> = 600 V<br>f <sub>P</sub> = 2 Hz<br>σ = 0.6 S·m <sup>-1</sup><br>w <sub>b</sub> = 0.5 kg·m <sup>-3</sup> ·s <sup>-1</sup>  | NA (No 2D figure of T-distribution) | NA (No 2D figure of T-distribution) | NA (No 2D figure of T-distribution) | NA                                                                                                                  | NA                               | [34] |
| NA (No 2D figure of T-distribution)        | NA (No 2D figure of T-distribution) | NA (No 2D figure of T-distribution) | NA (No 2D figure of T-distribution) | NA (No 2D figure of T-distribution)     | NA (No 2D figure of T-distribution) | NA (No 2D figure of T-distribution) | NA (No 2D figure of T-distribution) | NA (No 2D figure of T-distribution) | NA (No 2D figure of T-distribution) | [37, 51]                                     | V <sub>P</sub> = 600 V<br>f <sub>P</sub> = 1 Hz<br>σ = 0.6 S·m <sup>-1</sup><br>w <sub>b</sub> = 0.5 kg·m <sup>-3</sup> ·s <sup>-1</sup>  | NA (No 2D figure of T-distribution) | NA (No 2D figure of T-distribution) | NA (No 2D figure of T-distribution) | NA                                                                                                                  | NA                               | [34] |
| NA (No 2D figure of T-distribution)        | NA (No 2D figure of T-distribution) | NA (No 2D figure of T-distribution) | NA (No 2D figure of T-distribution) | NA (No 2D figure of T-distribution)     | NA (No 2D figure of T-distribution) | NA (No 2D figure of T-distribution) | NA (No 2D figure of T-distribution) | NA (No 2D figure of T-distribution) | NA (No 2D figure of T-distribution) | [37, 40]                                     | V <sub>P</sub> = 450 V<br>f <sub>P</sub> = 0.5 Hz<br>σ = 0.6 S·m <sup>-1</sup><br>w <sub>b</sub> = 0.5 kg m <sup>-3</sup> s <sup>-1</sup> | NA (No 2D figure of T-distribution) | NA (No 2D figure of T-distribution) | NA (No 2D figure of T-distribution) | NA                                                                                                                  | NA                               | [34] |

| Simulations of electric-field distribution |                                     |                                     |                                     | Simulations of temperature distribution |                                     |                                     |                                     |                                     |                                     |                                |                                                                                                                        | Parameters for meta-analysis        |                                     |                                     | Validation                                                                 |                                  |      |
|--------------------------------------------|-------------------------------------|-------------------------------------|-------------------------------------|-----------------------------------------|-------------------------------------|-------------------------------------|-------------------------------------|-------------------------------------|-------------------------------------|--------------------------------|------------------------------------------------------------------------------------------------------------------------|-------------------------------------|-------------------------------------|-------------------------------------|----------------------------------------------------------------------------|----------------------------------|------|
| $S_{E-IRE(th)}$                            |                                     |                                     |                                     | $S_{\Delta T13}$                        |                                     |                                     | $S_{\Delta T13}$                    |                                     |                                     | $T_{init}$ and $T_{max}$ range | Additional Details                                                                                                     | $S_{E-IRE(th),\Sigma}$              | $R_{\Delta T13}$                    | $R_{\Delta T13}$                    | Experimental Pulse Parameters ( $V_P$ , $t_P$ , $N_P$ , $\tau_P$ , $f_P$ ) | Parameters attempted to validate | Ref  |
| Average $E_{IRE(th)}$                      | Size                                | Position                            | Number                              | Size                                    | Position                            | Number                              | $S_{\Delta T13}$                    | Position                            | Number                              |                                |                                                                                                                        | [m <sup>2</sup> ]                   | [%]                                 | [%]                                 | ([V], [s], [-], [s], [Hz])                                                 |                                  |      |
| [V·m <sup>-1</sup> ]                       | [m <sup>2</sup> ]                   |                                     |                                     | [m <sup>2</sup> ]                       |                                     |                                     | [m <sup>2</sup> ]                   |                                     |                                     | [°C]                           |                                                                                                                        | [m <sup>2</sup> ]                   | [%]                                 | [%]                                 | ([V], [s], [-], [s], [Hz])                                                 |                                  |      |
| NA (No 2D figure of T-distribution)        | NA (No 2D figure of T-distribution) | NA (No 2D figure of T-distribution) | NA (No 2D figure of T-distribution) | NA (No 2D figure of T-distribution)     | NA (No 2D figure of T-distribution) | NA (No 2D figure of T-distribution) | NA (No 2D figure of T-distribution) | NA (No 2D figure of T-distribution) | NA (No 2D figure of T-distribution) | [37, 49]                       | $V_P = 450$ V<br>$f_P = 10$ Hz<br>$\sigma = 0.6$ S·m <sup>-1</sup><br>$w_0 = 0.5$ kg·m <sup>-3</sup> ·s <sup>-1</sup>  | NA (No 2D figure of T-distribution) | NA (No 2D figure of T-distribution) | NA (No 2D figure of T-distribution) | NA                                                                         | NA                               | [34] |
| NA (No 2D figure of T-distribution)        | NA (No 2D figure of T-distribution) | NA (No 2D figure of T-distribution) | NA (No 2D figure of T-distribution) | NA (No 2D figure of T-distribution)     | NA (No 2D figure of T-distribution) | NA (No 2D figure of T-distribution) | NA (No 2D figure of T-distribution) | NA (No 2D figure of T-distribution) | NA (No 2D figure of T-distribution) | [37, 55]                       | $V_P = 750$ V<br>$f_P = 0.5$ Hz<br>$\sigma = 0.6$ S·m <sup>-1</sup><br>$w_0 = 0.5$ kg·m <sup>-3</sup> ·s <sup>-1</sup> | NA (No 2D figure of T-distribution) | NA (No 2D figure of T-distribution) | NA (No 2D figure of T-distribution) | NA                                                                         | NA                               | [34] |
| NA (No 2D figure of T-distribution)        | NA (No 2D figure of T-distribution) | NA (No 2D figure of T-distribution) | NA (No 2D figure of T-distribution) | NA (No 2D figure of T-distribution)     | NA (No 2D figure of T-distribution) | NA (No 2D figure of T-distribution) | NA (No 2D figure of T-distribution) | NA (No 2D figure of T-distribution) | NA (No 2D figure of T-distribution) | [37, 87]                       | $V_P = 750$ V<br>$f_P = 10$ Hz<br>$\sigma = 0.6$ S·m <sup>-1</sup><br>$w_0 = 0.5$ kg·m <sup>-3</sup> ·s <sup>-1</sup>  | NA (No 2D figure of T-distribution) | NA (No 2D figure of T-distribution) | NA (No 2D figure of T-distribution) | NA                                                                         | NA                               | [34] |
| 1000·10 <sup>-2</sup>                      | NA (NTA)                            | NA (NTA)                            | NA (NTA)                            | NA (NTA)                                | NA (NTA)                            | NA (NTA)                            | NA (NTA)                            | NA (NTA)                            | NA (NTA)                            | NA (NTA)                       | NA                                                                                                                     | NA (NTA)                            | NA (NTA)                            | NA (NTA)                            | ([1100:100:1300], 100·10 <sup>-6</sup> , 100, 3, NA)                       | NA                               | [35] |
| NA (No 2D figure of T-distribution)        | NA (No 2D figure of T-distribution) | NA (No 2D figure of T-distribution) | NA (No 2D figure of T-distribution) | NA (No 2D figure of T-distribution)     | NA (No 2D figure of T-distribution) | NA (No 2D figure of T-distribution) | NA (No 2D figure of T-distribution) | NA (No 2D figure of T-distribution) | NA (No 2D figure of T-distribution) | [37, 40.13]                    | $f_P = 1$ Hz                                                                                                           | NA (No 2D figure of T-distribution) | NA (No 2D figure of T-distribution) | NA (No 2D figure of T-distribution) | (70, 100·10 <sup>-6</sup> , 90, {1, 4})                                    | $E_{IRE(th)}$                    | [36] |
| NA (No 2D figure of T-distribution)        | NA (No 2D figure of T-distribution) | NA (No 2D figure of T-distribution) | NA (No 2D figure of T-distribution) | NA (No 2D figure of T-distribution)     | NA (No 2D figure of T-distribution) | NA (No 2D figure of T-distribution) | NA (No 2D figure of T-distribution) | NA (No 2D figure of T-distribution) | NA (No 2D figure of T-distribution) | [37, 40.93]                    | $f_P = 4$ Hz                                                                                                           | NA (No 2D figure of T-distribution) | NA (No 2D figure of T-distribution) | NA (No 2D figure of T-distribution) | (70, 100·10 <sup>-6</sup> , 90, {1, 4})                                    | $E_{IRE(th)}$                    | [36] |
| 423·10 <sup>2</sup>                        | 1.54·10 <sup>-4</sup>               | Center                              | 1                                   | 6.86·10 <sup>-5</sup>                   | Center                              | 1                                   | 6.36·10 <sup>-5</sup>               | Center                              | 1                                   | [21, 35.5]                     | NA                                                                                                                     | 1.54·10 <sup>-4</sup>               | 44.5                                | 41.3                                | (1500, 100·10 <sup>-6</sup> , 99, NA, {0.25, 0.5, 1, 4})                   | $E_{IRE(th)}$                    | [37] |
| 680·10 <sup>2</sup>                        | NA (NTA)                            | NA (NTA)                            | NA (NTA)                            | NA (NTA)                                | NA (NTA)                            | NA (NTA)                            | NA (NTA)                            | NA (NTA)                            | NA (NTA)                            | NA (NTA)                       | NA                                                                                                                     | NA (NTA)                            | NA (NTA)                            | NA (NTA)                            | ({1000, 1500, 2500}, 100·10 <sup>-6</sup> , 8,                             | $E_{IRE(th)}$                    | [38] |

| Simulations of electric-field distribution |                      |          |        | Simulations of temperature distribution |                                         |                                         |                   |               |        |                                |                                                                                               |                              |                                         |                  |                                                                            |                                  |      |
|--------------------------------------------|----------------------|----------|--------|-----------------------------------------|-----------------------------------------|-----------------------------------------|-------------------|---------------|--------|--------------------------------|-----------------------------------------------------------------------------------------------|------------------------------|-----------------------------------------|------------------|----------------------------------------------------------------------------|----------------------------------|------|
| $S_{E-IRE(th)}$                            |                      |          |        | $S_{\Delta T13}$                        |                                         |                                         | $S_{\Delta T13}$  |               |        | $T_{init}$ and $T_{max}$ range | Additional Details                                                                            | Parameters for meta-analysis |                                         |                  | Validation                                                                 |                                  | Ref  |
| Average $E_{IRE(th)}$                      | Size                 | Position | Number | Size                                    | Position                                | Number                                  | $S_{\Delta T13}$  | Position      | Number |                                |                                                                                               | $S_{E-IRE(th),\Sigma}$       | $R_{\Delta T13}$                        | $R_{\Delta T13}$ | Experimental Pulse Parameters ( $V_P$ , $t_P$ , $N_P$ , $\tau_P$ , $f_P$ ) | Parameters attempted to validate |      |
| $[V \cdot m^{-1}]$                         | $[m^2]$              |          |        | $[m^2]$                                 |                                         |                                         | $[m^2]$           |               |        | $[^{\circ}C]$                  |                                                                                               | $[m^2]$                      | $[\%]$                                  | $[\%]$           | $([V], [s], [-], [s], [Hz])$                                               |                                  |      |
|                                            |                      |          |        |                                         |                                         |                                         |                   |               |        |                                |                                                                                               |                              |                                         |                  | $100 \cdot 10^{-3}$ , NA)                                                  |                                  |      |
| $680 \cdot 10^2$                           | $4.05 \cdot 10^{-4}$ | Center   | 1      | NA ( $T_{init}$ is not shown in figure) | NA ( $T_{init}$ is not shown in figure) | NA ( $T_{init}$ is not shown in figure) | 0                 | Center        | 1      | [37, 56.4]                     | (Saline $\{\sigma = 1 S \cdot m^{-1}$ , Thickness = $1 \cdot 10^{-3} m\}$ , $V_P = 3000 V$ )  | $4.05 \cdot 10^{-4}$         | NA ( $T_{init}$ is not shown in figure) | 0                | NA                                                                         | NA                               | [39] |
| $680 \cdot 10^2$                           | $5.17 \cdot 10^{-4}$ | Center   | 1      | NA ( $T_{init}$ is not shown in figure) | NA ( $T_{init}$ is not shown in figure) | NA ( $T_{init}$ is not shown in figure) | $3 \cdot 10^{-6}$ | {Left, Right} | 2      | [37, 53.7]                     | (Saline $\{\sigma = 8 S \cdot m^{-1}$ , Thickness = $1 \cdot 10^{-3} m\}$ , $V_P = 3000 V$ )  | $5.17 \cdot 10^{-4}$         | NA ( $T_{init}$ is not shown in figure) | 1.16             | NA                                                                         | NA                               | [39] |
| NA                                         | NA                   | NA       | NA     | NA                                      | NA                                      | NA                                      | NA                | NA            | NA     | [37, 63.3]                     | (No Saline, $V_P = 3000V$ )                                                                   | NA                           | NA                                      | NA               | NA                                                                         | NA                               | [39] |
| NA                                         | NA                   | NA       | NA     | NA                                      | NA                                      | NA                                      | NA                | NA            | NA     | [37, 57.1]                     | (Saline {Thickness = $0.25 \cdot 10^{-3} m$ , $\sigma = 1 S \cdot m^{-1}$ }, $V_P = 3000 V$ ) | NA                           | NA                                      | NA               | NA                                                                         | NA                               | [39] |
| NA                                         | NA                   | NA       | NA     | NA                                      | NA                                      | NA                                      | NA                | NA            | NA     | [37, 39.4]                     | (Saline {Thickness = $0.25 \cdot 10^{-3} m$ , $\sigma = 8 S \cdot m^{-1}$ }, $V_P = 1000 V$ ) | NA                           | NA                                      | NA               | NA                                                                         | NA                               | [39] |
| NA                                         | NA                   | NA       | NA     | NA                                      | NA                                      | NA                                      | NA                | NA            | NA     | [37, 55.2]                     | (Saline {Thickness = $0.5 \cdot 10^{-3} m$ , $\sigma = 1 S \cdot m^{-1}$ }, $V_P = 3000 V$ )  | NA                           | NA                                      | NA               | NA                                                                         | NA                               | [39] |
| NA                                         | NA                   | NA       | NA     | NA                                      | NA                                      | NA                                      | NA                | NA            | NA     | [37, 39.2]                     | (Saline {Thickness = $0.5 \cdot 10^{-3} m$ , $\sigma = 8 S \cdot m^{-1}$ }, $V_P = 1000 V$ )  | NA                           | NA                                      | NA               | NA                                                                         | NA                               | [39] |

| Simulations of electric-field distribution |                                     |                                     |                                     | Simulations of temperature distribution      |                                              |                                              |                                     |                                     |                                     |                                |                                                                                               |                                     |                                     |                                     |                                                                            |                                  |      |
|--------------------------------------------|-------------------------------------|-------------------------------------|-------------------------------------|----------------------------------------------|----------------------------------------------|----------------------------------------------|-------------------------------------|-------------------------------------|-------------------------------------|--------------------------------|-----------------------------------------------------------------------------------------------|-------------------------------------|-------------------------------------|-------------------------------------|----------------------------------------------------------------------------|----------------------------------|------|
| $S_{E-IRE(th)}$                            |                                     |                                     |                                     | $S_{3\Delta T13}$                            |                                              |                                              | $S_{\Delta T13}$                    |                                     |                                     | $T_{init}$ and $T_{max}$ range | Additional Details                                                                            | Parameters for meta-analysis        |                                     |                                     | Validation                                                                 |                                  | Ref  |
| Average $E_{IRE(th)}$                      | Size                                | Position                            | Number                              | Size                                         | Position                                     | Number                                       | $S_{\Delta T13}$                    | Position                            | Number                              |                                |                                                                                               | $S_{E-IRE(th),\Sigma}$              | $R_{3\Delta T13}$                   | $R_{\Delta T13}$                    | Experimental Pulse Parameters ( $V_P$ , $t_P$ , $N_P$ , $\tau_P$ , $f_P$ ) | Parameters attempted to validate |      |
| [V·m <sup>-1</sup> ]                       | [m <sup>2</sup> ]                   |                                     |                                     | [m <sup>2</sup> ]                            |                                              |                                              | [m <sup>2</sup> ]                   |                                     |                                     | [°C]                           |                                                                                               | [m <sup>2</sup> ]                   | [%]                                 | [%]                                 | ([V], [s], [-], [s], [Hz])                                                 |                                  |      |
| NA                                         | NA                                  | NA                                  | NA                                  | NA                                           | NA                                           | NA                                           | NA                                  | NA                                  | NA                                  | [37, 60.2]                     | (Saline {Thickness $s = 2 \cdot 10^{-3}$ m, $\sigma = 1$ S·m <sup>-1</sup> }, $V_P = 3000$ V) | NA                                  | NA                                  | NA                                  | NA                                                                         | NA                               | [39] |
| NA                                         | NA                                  | NA                                  | NA                                  | NA                                           | NA                                           | NA                                           | NA                                  | NA                                  | NA                                  | [37, 38.9]                     | (Saline {Thickness $s = 1 \cdot 10^{-3}$ m, $\sigma = 8$ S·m <sup>-1</sup> }, $V_P = 1000$ V) | NA                                  | NA                                  | NA                                  | NA                                                                         | NA                               | [39] |
| NA                                         | NA                                  | NA                                  | NA                                  | NA                                           | NA                                           | NA                                           | NA                                  | NA                                  | NA                                  | [37, 39.6]                     | (Saline {Thickness $s = 2 \cdot 10^{-3}$ m, $\sigma = 8$ S·m <sup>-1</sup> }, $V_P = 1000$ V) | NA                                  | NA                                  | NA                                  | NA                                                                         | NA                               | [39] |
| 500·10 <sup>2</sup>                        | NR                                  | NR                                  | NR                                  | NR                                           | NR                                           | NR                                           | NR                                  | NR                                  | NR                                  | [33.3, 34.3]                   | ( $V_P = 500$ V, $N_P = 4 \times 20$ , $f_P = 1$ Hz, Additional waiting time of 3.5 s)        | NR                                  | NR                                  | NR                                  | (500, 50·10 <sup>-6</sup> , 4×20, NR, NR, ~1)                              | T                                | [40] |
| 500·10 <sup>2</sup>                        | 8.94·10 <sup>-5</sup>               | Center                              | 1                                   | NA (Temperatures below 43 °C were not shown) | NA (Temperatures below 43 °C were not shown) | NA (Temperatures below 43 °C were not shown) | 0                                   | NA                                  | NA                                  | [37, 47.8]                     | ( $V_P = 1000$ V, $N_P = 80$ , $f_P = 1$ Hz)                                                  | 8.94·10 <sup>-5</sup>               | NA                                  | 0                                   | NA                                                                         | NA                               | [40] |
| NA (No 2D figure of T-distribution)        | NA (No 2D figure of T-distribution) | NA (No 2D figure of T-distribution) | NA (No 2D figure of T-distribution) | NA (No 2D figure of T-distribution)          | NA (No 2D figure of T-distribution)          | NA (No 2D figure of T-distribution)          | NA (No 2D figure of T-distribution) | NA (No 2D figure of T-distribution) | NA (No 2D figure of T-distribution) | [37, 45.25]                    | Circular plate                                                                                | NA (No 2D figure of T-distribution) | NA (No 2D figure of T-distribution) | NA (No 2D figure of T-distribution) | ({70, 600}, 100·10 <sup>-6</sup> , 90, NA, 4)                              | $E_{IRE(th)}$                    | [41] |
| NA (No 2D figure of T-distribution)        | NA (No 2D figure of T-distribution) | NA (No 2D figure of T-distribution) | NA (No 2D figure of T-distribution) | NA (No 2D figure of T-distribution)          | NA (No 2D figure of T-distribution)          | NA (No 2D figure of T-distribution)          | NA (No 2D figure of T-distribution) | NA (No 2D figure of T-distribution) | NA (No 2D figure of T-distribution) | [37, 66.8]                     | Endovascular                                                                                  | NA (No 2D figure of T-distribution) | NA (No 2D figure of T-distribution) | NA (No 2D figure of T-distribution) | ({70, 600}, 100·10 <sup>-6</sup> , 90, NA, 4)                              | $E_{IRE(th)}$                    | [41] |

| Simulations of electric-field distribution |                                     |                                     |                                     | Simulations of temperature distribution |                                     |                                     |                                     |                                     |                                     |                                |                                                                                                                                                          |                                     |                                     |                                     |                                                                            |                                  |      |
|--------------------------------------------|-------------------------------------|-------------------------------------|-------------------------------------|-----------------------------------------|-------------------------------------|-------------------------------------|-------------------------------------|-------------------------------------|-------------------------------------|--------------------------------|----------------------------------------------------------------------------------------------------------------------------------------------------------|-------------------------------------|-------------------------------------|-------------------------------------|----------------------------------------------------------------------------|----------------------------------|------|
| $S_{E-IRE(th)}$                            |                                     |                                     |                                     | $S_{3\Delta T13}$                       |                                     |                                     | $S_{\Delta T13}$                    |                                     |                                     | $T_{init}$ and $T_{max}$ range | Additional Details                                                                                                                                       | Parameters for meta-analysis        |                                     |                                     | Validation                                                                 |                                  | Ref  |
| Average $E_{IRE(th)}$                      | Size                                | Position                            | Number                              | Size                                    | Position                            | Number                              | $S_{\Delta T13}$                    | Position                            | Number                              |                                |                                                                                                                                                          | $S_{E-IRE(th),\Sigma}$              | $R_{3\Delta T13}$                   | $R_{\Delta T13}$                    | Experimental Pulse Parameters ( $V_P$ , $t_P$ , $N_P$ , $\tau_P$ , $f_P$ ) | Parameters attempted to validate |      |
| [V·m <sup>-1</sup> ]                       | [m <sup>2</sup> ]                   |                                     |                                     | [m <sup>2</sup> ]                       |                                     |                                     | [m <sup>2</sup> ]                   |                                     |                                     | [°C]                           |                                                                                                                                                          | [m <sup>2</sup> ]                   | [%]                                 | [%]                                 | ([V], [s], [-], [s], [Hz])                                                 |                                  |      |
| NA (No 2D figure of E-distribution)        | NA (No 2D figure of E-distribution) | NA (No 2D figure of E-distribution) | NA (No 2D figure of E-distribution) | NA (No 2D figure of E-distribution)     | NA (No 2D figure of E-distribution) | NA (No 2D figure of E-distribution) | NA (No 2D figure of E-distribution) | NA (No 2D figure of E-distribution) | NA (No 2D figure of E-distribution) | [37, 39.3]                     | Temperature calculated using Pennes Bioheat Equation E-field distribution of all electrode pairs was simultaneously used for calculation of T            | NA (No 2D figure of E-distribution) | NA (No 2D figure of E-distribution) | NA (No 2D figure of E-distribution) | NA                                                                         | NA                               | [42] |
| NA (No 2D figure of E-distribution)        | NA (No 2D figure of E-distribution) | NA (No 2D figure of E-distribution) | NA (No 2D figure of E-distribution) | NA (No 2D figure of E-distribution)     | NA (No 2D figure of E-distribution) | NA (No 2D figure of E-distribution) | NA (No 2D figure of E-distribution) | NA (No 2D figure of E-distribution) | NA (No 2D figure of E-distribution) | [37, 67.3]                     | Temperature calculated using simplified Pennes Bioheat equation E-field distribution of all electrode pairs was simultaneously used for calculation of T | NA (No 2D figure of E-distribution) | NA (No 2D figure of E-distribution) | NA (No 2D figure of E-distribution) | NA                                                                         | NA                               | [42] |
| NA (No 2D figure of T-distribution)        | NA (No 2D figure of T-distribution) | NA (No 2D figure of T-distribution) | NA (No 2D figure of T-distribution) | NA (No 2D figure of T-distribution)     | NA (No 2D figure of T-distribution) | NA (No 2D figure of T-distribution) | NA (No 2D figure of T-distribution) | NA (No 2D figure of T-distribution) | NA (No 2D figure of T-distribution) | [22, 23]                       | $V_P = 150$ V                                                                                                                                            | NA (No 2D figure of T-distribution) | NA (No 2D figure of T-distribution) | NA (No 2D figure of T-distribution) | ([0:150:600], 100·10 <sup>-6</sup> , 80, NA, 1)                            | {T, $\sigma$ , $E_{IRE(th)}$ }   | [43] |
| NA (No 2D figure of T-distribution)        | NA (No 2D figure of T-distribution) | NA (No 2D figure of T-distribution) | NA (No 2D figure of T-distribution) | NA (No 2D figure of T-distribution)     | NA (No 2D figure of T-distribution) | NA (No 2D figure of T-distribution) | NA (No 2D figure of T-distribution) | NA (No 2D figure of T-distribution) | NA (No 2D figure of T-distribution) | [22, 27]                       | $V_P = 300$ V                                                                                                                                            | NA (No 2D figure of T-distribution) | NA (No 2D figure of T-distribution) | NA (No 2D figure of T-distribution) | ([0:150:600], 100·10 <sup>-6</sup> , 80, NA, 1)                            | {T, $\sigma$ , $E_{IRE(th)}$ }   | [43] |

| Simulations of electric-field distribution |                                     |                                     |                                     | Simulations of temperature distribution |                                     |                                     |                                     |                                     |                                     |                                |                                                                                                                                      |                                     |                                     |                                     |                                                                            |                                  |      |
|--------------------------------------------|-------------------------------------|-------------------------------------|-------------------------------------|-----------------------------------------|-------------------------------------|-------------------------------------|-------------------------------------|-------------------------------------|-------------------------------------|--------------------------------|--------------------------------------------------------------------------------------------------------------------------------------|-------------------------------------|-------------------------------------|-------------------------------------|----------------------------------------------------------------------------|----------------------------------|------|
| $S_{E-IRE(th)}$                            |                                     |                                     |                                     | $S_{\Delta T13}$                        |                                     |                                     | $S_{\Delta T13}$                    |                                     |                                     | $T_{init}$ and $T_{max}$ range | Additional Details                                                                                                                   | Parameters for meta-analysis        |                                     |                                     | Validation                                                                 |                                  | Ref  |
| Average $E_{IRE(th)}$                      | Size                                | Position                            | Number                              | Size                                    | Position                            | Number                              | $S_{\Delta T13}$                    | Position                            | Number                              |                                |                                                                                                                                      | $S_{E-IRE(th),\Sigma}$              | $R_{\Delta T13}$                    | $R_{\Delta T13}$                    | Experimental Pulse Parameters ( $V_P$ , $t_P$ , $N_P$ , $\tau_P$ , $f_P$ ) | Parameters attempted to validate |      |
| [V·m <sup>-1</sup> ]                       | [m <sup>2</sup> ]                   |                                     |                                     | [m <sup>2</sup> ]                       |                                     |                                     | [m <sup>2</sup> ]                   |                                     |                                     | [°C]                           |                                                                                                                                      | [m <sup>2</sup> ]                   | [%]                                 | [%]                                 | ([V], [s], [-], [s], [Hz])                                                 |                                  |      |
| distribution                               | distribution                        | distribution                        | distribution                        | distribution                            | distribution                        | distribution                        | distribution                        | distribution                        | distribution                        |                                |                                                                                                                                      | distribution                        | distribution                        | distribution                        |                                                                            |                                  |      |
| NA (No 2D figure of T-distribution)        | NA (No 2D figure of T-distribution) | NA (No 2D figure of T-distribution) | NA (No 2D figure of T-distribution) | NA (No 2D figure of T-distribution)     | NA (No 2D figure of T-distribution) | NA (No 2D figure of T-distribution) | NA (No 2D figure of T-distribution) | NA (No 2D figure of T-distribution) | NA (No 2D figure of T-distribution) | [22, 35]                       | $V_P = 450$ V                                                                                                                        | NA (No 2D figure of T-distribution) | NA (No 2D figure of T-distribution) | NA (No 2D figure of T-distribution) | ([0:150:600], 100·10 <sup>-6</sup> , 80, NA, 1)                            | {T, $\sigma$ , $E_{IRE(th)}$ }   | [43] |
| NA (No 2D figure of T-distribution)        | NA (No 2D figure of T-distribution) | NA (No 2D figure of T-distribution) | NA (No 2D figure of T-distribution) | NA (No 2D figure of T-distribution)     | NA (No 2D figure of T-distribution) | NA (No 2D figure of T-distribution) | NA (No 2D figure of T-distribution) | NA (No 2D figure of T-distribution) | NA (No 2D figure of T-distribution) | [22, 51]                       | $V_P = 600$ V                                                                                                                        | NA (No 2D figure of T-distribution) | NA (No 2D figure of T-distribution) | NA (No 2D figure of T-distribution) | ([0:150:600], 100·10 <sup>-6</sup> , 80, NA, 1)                            | {T, $\sigma$ , $E_{IRE(th)}$ }   | [43] |
| NA (No 2D figure of T-distribution)        | NA (No 2D figure of T-distribution) | NA (No 2D figure of T-distribution) | NA (No 2D figure of T-distribution) | NA (No 2D figure of T-distribution)     | NA (No 2D figure of T-distribution) | NA (No 2D figure of T-distribution) | NA (No 2D figure of T-distribution) | NA (No 2D figure of T-distribution) | NA (No 2D figure of T-distribution) | [36.6, 55.3]                   | (Sclera, {External ring electrode, External disk electrode}, $V_P = 2000$ V, $t_P = 100 \cdot 10^{-6}$ s, $N_P = 90$ , $f_P = 1$ Hz) | NA (No 2D figure of T-distribution) | NA (No 2D figure of T-distribution) | NA (No 2D figure of T-distribution) | NA                                                                         | NA                               | [44] |
| NA (No 2D figure of T-distribution)        | NA (No 2D figure of T-distribution) | NA (No 2D figure of T-distribution) | NA (No 2D figure of T-distribution) | NA (No 2D figure of T-distribution)     | NA (No 2D figure of T-distribution) | NA (No 2D figure of T-distribution) | NA (No 2D figure of T-distribution) | NA (No 2D figure of T-distribution) | NA (No 2D figure of T-distribution) | [36.65, 49.75]                 | (Retina, {External ring electrode, External disk electrode}, $V_P = 2000$ V, $t_P = 100 \cdot 10^{-6}$ s, $N_P = 90$ , $f_P = 1$ Hz) | NA (No 2D figure of T-distribution) | NA (No 2D figure of T-distribution) | NA (No 2D figure of T-distribution) | NA                                                                         | NA                               | [44] |
| NA (No 2D figure of T-distribution)        | NA (No 2D figure of T-distribution) | NA (No 2D figure of T-distribution) | NA (No 2D figure of T-distribution) | NA (No 2D figure of T-distribution)     | NA (No 2D figure of T-distribution) | NA (No 2D figure of T-distribution) | NA (No 2D figure of T-distribution) | NA (No 2D figure of T-distribution) | NA (No 2D figure of T-distribution) | [36.71, 48.19]                 | (Ocular tumor, {External ring electrode, External disk                                                                               | NA (No 2D figure of T-distribution) | NA (No 2D figure of T-distribution) | NA (No 2D figure of T-distribution) | NA                                                                         | NA                               | [44] |



| Simulations of electric-field distribution  |                                             |                                             |                                             | Simulations of temperature distribution     |                                             |                                             |                                             |                                             |                                             |                                              |                                                                                                                                                        |                                             |                                             |                                             |                                                                                                                     |                                  |      |
|---------------------------------------------|---------------------------------------------|---------------------------------------------|---------------------------------------------|---------------------------------------------|---------------------------------------------|---------------------------------------------|---------------------------------------------|---------------------------------------------|---------------------------------------------|----------------------------------------------|--------------------------------------------------------------------------------------------------------------------------------------------------------|---------------------------------------------|---------------------------------------------|---------------------------------------------|---------------------------------------------------------------------------------------------------------------------|----------------------------------|------|
| S <sub>E-IRE(th)</sub>                      |                                             |                                             |                                             | S <sub>3ΔT13</sub>                          |                                             |                                             | S <sub>ΔT13</sub>                           |                                             |                                             |                                              |                                                                                                                                                        | Parameters for meta-analysis                |                                             |                                             | Validation                                                                                                          |                                  |      |
| Average E <sub>IRE(th)</sub>                | Size                                        | Position                                    | Number                                      | Size                                        | Position                                    | Number                                      | S <sub>ΔT13</sub>                           | Position                                    | Number                                      | T <sub>init</sub> and T <sub>max</sub> range | Additional Details                                                                                                                                     | S <sub>E-IRE(th),Σ</sub>                    | R <sub>3ΔT13</sub>                          | R <sub>ΔT13</sub>                           | Experimental Pulse Parameters (V <sub>P</sub> , t <sub>P</sub> , N <sub>P</sub> , t <sub>P</sub> , f <sub>P</sub> ) | Parameters attempted to validate | Ref  |
| [V·m <sup>-1</sup> ]                        | [m <sup>2</sup> ]                           |                                             |                                             | [m <sup>2</sup> ]                           |                                             |                                             | [m <sup>2</sup> ]                           |                                             |                                             | [°C]                                         |                                                                                                                                                        | [m <sup>2</sup> ]                           | [%]                                         | [%]                                         | ([V], [s], [-], [s], [Hz])                                                                                          |                                  |      |
|                                             |                                             |                                             |                                             |                                             |                                             |                                             |                                             |                                             |                                             |                                              | electrode}, σ = 0.3322 S·m <sup>-1</sup> , V <sub>P</sub> = 2000V, t <sub>P</sub> = 100·10 <sup>-6</sup> s, N <sub>P</sub> = 90, f <sub>P</sub> = 1Hz) |                                             |                                             |                                             |                                                                                                                     |                                  |      |
| 500·10 <sup>2</sup>                         | NA (No 2D figure of temperature)            | NR                                           | NA                                                                                                                                                     | NA (No 2D figure of temperature)            | NA (No 2D figure of temperature)            | NA (No 2D figure of temperature)            | ([100:50:500], 750, 1000), {100·10 <sup>-6</sup> , 500·10 <sup>-6</sup> }, 10, 200, NA, 1)                          | σ                                | [45] |
| NTA                                          | NA                                                                                                                                                     | NTA                                         | NTA                                         | NTA                                         | NA                                                                                                                  | NA                               | [46] |
| 1250·10 <sup>2</sup>                        | NA                                           | NA                                                                                                                                                     | NA                                          | NA                                          | NA                                          | (1·10 <sup>3</sup> , 10·10 <sup>-6</sup> , [15, 30, 45, 60, 75, 90], 100·10 <sup>-3</sup> , NA)                     | E <sub>IRE(th)</sub>             | [47] |
| NA (No 2D figure of T-distribution)         | [37.2, 39.4]                                 | NA                                                                                                                                                     | NA (No 2D figure of T-distribution)         | NA (No 2D figure of T-distribution)         | NA (No 2D figure of T-distribution)         | (500, 50·10 <sup>-6</sup> , 200, NA, 1)                                                                             | NA                               | [48] |
| NA (No 2D figures of E and T-distributions) | NA (No 2D figures of E and T-distributions) | NA (No 2D figures of E and T-distributions) | NA (No 2D figures of E and T-distributions) | NA (No 2D figures of E and T-distributions) | NA (No 2D figures of E and T-distributions) | NA (No 2D figures of E and T-distributions) | NA (No 2D figures of E and T-distributions) | NA (No 2D figures of E and T-distributions) | NA (No 2D figures of E and T-distributions) | [37, 39]                                     | (No seed array)                                                                                                                                        | NA (No 2D figures of E and T-distributions) | NA (No 2D figures of E and T-distributions) | NA (No 2D figures of E and T-distributions) | ([1250, 2625], 100·10 <sup>-6</sup> , 100, NA, 1)                                                                   | NA                               | [49] |
| NA (No 2D figures of E and T-distributions) | NA (No 2D figures of E and T-distributions) | NA (No 2D figures of E and T-distributions) | NA (No 2D figures of E and T-distributions) | NA (No 2D figures of E and T-distributions) | NA (No 2D figures of E and T-distributions) | NA (No 2D figures of E and T-distributions) | NA (No 2D figures of E and T-distributions) | NA (No 2D figures of E and T-distributions) | NA (No 2D figures of E and T-distributions) | [37, 39]                                     | (9-seed array)                                                                                                                                         | NA (No 2D figures of E and T-distributions) | NA (No 2D figures of E and T-distributions) | NA (No 2D figures of E and T-distributions) | ([1250, 2625], 100·10 <sup>-6</sup> , 100, NA, 1)                                                                   | NA                               | [49] |

| Simulations of electric-field distribution  |                                             |                                             |                                             | Simulations of temperature distribution     |                                             |                                             |                                             |                                             |                                             |                                              |                             | Parameters for meta-analysis                |                                             |                                             | Validation                                                                                                          |                                  |      |
|---------------------------------------------|---------------------------------------------|---------------------------------------------|---------------------------------------------|---------------------------------------------|---------------------------------------------|---------------------------------------------|---------------------------------------------|---------------------------------------------|---------------------------------------------|----------------------------------------------|-----------------------------|---------------------------------------------|---------------------------------------------|---------------------------------------------|---------------------------------------------------------------------------------------------------------------------|----------------------------------|------|
| S <sub>E-IRE(th)</sub>                      |                                             |                                             |                                             | S <sub>3ΔT13</sub>                          |                                             |                                             | S <sub>ΔT13</sub>                           |                                             |                                             |                                              |                             | Parameters for meta-analysis                |                                             |                                             | Validation                                                                                                          |                                  |      |
| Average E <sub>IRE(th)</sub>                | Size                                        | Position                                    | Number                                      | Size                                        | Position                                    | Number                                      | S <sub>ΔT13</sub>                           | Position                                    | Number                                      | T <sub>init</sub> and T <sub>max</sub> range | Additional Details          | S <sub>E-IRE(th),Σ</sub>                    | R <sub>3ΔT13</sub>                          | R <sub>ΔT13</sub>                           | Experimental Pulse Parameters (V <sub>P</sub> , t <sub>P</sub> , N <sub>P</sub> , τ <sub>P</sub> , f <sub>P</sub> ) | Parameters attempted to validate | Ref  |
| [V·m <sup>-1</sup> ]                        | [m <sup>2</sup> ]                           |                                             |                                             | [m <sup>2</sup> ]                           |                                             |                                             | [m <sup>2</sup> ]                           |                                             |                                             | [°C]                                         |                             | [m <sup>2</sup> ]                           | [%]                                         | [%]                                         | ([V], [s], [-], [s], [Hz])                                                                                          |                                  |      |
| NA (No 2D figures of E and T-distributions) | NA (No 2D figures of E and T-distributions) | NA (No 2D figures of E and T-distributions) | NA (No 2D figures of E and T-distributions) | NA (No 2D figures of E and T-distributions) | NA (No 2D figures of E and T-distributions) | NA (No 2D figures of E and T-distributions) | NA (No 2D figures of E and T-distributions) | NA (No 2D figures of E and T-distributions) | NA (No 2D figures of E and T-distributions) | [37, 39]                                     | (39-seed array)             | NA (No 2D figures of E and T-distributions) | NA (No 2D figures of E and T-distributions) | NA (No 2D figures of E and T-distributions) | {1250, 2625}, 100·10 <sup>-6</sup> , 100, NA, 1)                                                                    | NA                               | [49] |
| 950·10 <sup>2</sup>                         | NTA                                          | NA                          | NTA                                         | NTA                                         | NTA                                         | (500, {10, 50, 100}, {10, 50, 99}, 10)                                                                              | E <sub>IRE(th)</sub>             | [50] |
| 387.5·10 <sup>2</sup>                       | NTA                                          | NA                          | NTA                                         | NTA                                         | NTA                                         | ([{1050, 1125}, 2100}, 100·10 <sup>-6</sup> , 90, NA, NR) (Monopolar electrode)                                     | NA                               | [51] |
| 387.5·10 <sup>2</sup>                       | NTA                                          | NA                          | NTA                                         | NTA                                         | NTA                                         | ({1500, 2000}, 100·10 <sup>-6</sup> , 90, NA, NR) (Bipolar electrode)                                               | NA                               | [51] |
| 650·10 <sup>2</sup>                         | NTA                                          | NA                          | NTA                                         | NTA                                         | NTA                                         | ({2000, 2100, 2250, 2400, 2500}, {70·10 <sup>-6</sup> , 100·10 <sup>-6</sup> }, {70, 90}, NR, NR)                   | E <sub>IRE(th)</sub>             | [52] |
| 580·10 <sup>2</sup>                         | NA (No 2D Temperature)                      | NR                                           | NA                          | NA (Reason: No 2D Temperature)              | NA (Reason: No 2D Temperature)              | NA (Reason: No 2D Temperature)              | NA                                                                                                                  | NA                               | [53] |
| NA                                          | NTA                                          |                             | NTA                                         | NTA                                         | NTA                                         | ([120, 240, 360, 480, 600, 720], 50·10 <sup>-6</sup> , 99, NA, 4)                                                   | NA                               | [54] |
| NA                                          | ΔT = 34 °C                                   | (V <sub>P</sub> = 1000 V, ϕ | NA                                          | NA                                          | NA                                          | NA                                                                                                                  | NA                               | [55] |

| Simulations of electric-field distribution |                                     |                                     |                                     | Simulations of temperature distribution |                                     |                                     |                                     |                                     |                                     |                                              |                                                                                                                         |                                     |                                     |                                     |                                                                                                                     |                                  |
|--------------------------------------------|-------------------------------------|-------------------------------------|-------------------------------------|-----------------------------------------|-------------------------------------|-------------------------------------|-------------------------------------|-------------------------------------|-------------------------------------|----------------------------------------------|-------------------------------------------------------------------------------------------------------------------------|-------------------------------------|-------------------------------------|-------------------------------------|---------------------------------------------------------------------------------------------------------------------|----------------------------------|
| S <sub>E-IRE(th)</sub>                     |                                     |                                     |                                     | S <sub>3AT13</sub>                      |                                     |                                     | S <sub>ΔT13</sub>                   |                                     |                                     | T <sub>init</sub> and T <sub>max</sub> range | Additional Details                                                                                                      | Parameters for meta-analysis        |                                     |                                     | Validation                                                                                                          |                                  |
| Average E <sub>IRE(th)</sub>               | Size                                | Position                            | Number                              | Size                                    | Position                            | Number                              | S <sub>ΔT13</sub>                   | Position                            | Number                              |                                              |                                                                                                                         | S <sub>E-IRE(th),Σ</sub>            | R <sub>3AT13</sub>                  | R <sub>ΔT13</sub>                   | Experimental Pulse Parameters (V <sub>p</sub> , t <sub>p</sub> , N <sub>p</sub> , τ <sub>p</sub> , f <sub>p</sub> ) | Parameters attempted to validate |
| [V·m <sup>-1</sup> ]                       | [m <sup>2</sup> ]                   |                                     |                                     | [m <sup>2</sup> ]                       |                                     |                                     | [m <sup>2</sup> ]                   |                                     |                                     | [°C]                                         |                                                                                                                         | [m <sup>2</sup> ]                   | [%]                                 | [%]                                 | ([V], [s], [-], [s], [Hz])                                                                                          |                                  |
| (No 2D figure of T-distribution)           | (No 2D figure of T-distribution)    | (No 2D figure of T-distribution)    | (No 2D figure of T-distribution)    | (No 2D figure of T-distribution)        | (No 2D figure of T-distribution)    | (No 2D figure of T-distribution)    | (No 2D figure of T-distribution)    | (No 2D figure of T-distribution)    | (No 2D figure of T-distribution)    |                                              | = 1·10 <sup>-3</sup> m, d = 5·10 <sup>-3</sup> m, t <sub>p</sub> = 300·10 <sup>-6</sup> s)                              | (No 2D figure of T-distribution)    | (No 2D figure of T-distribution)    | (No 2D figure of T-distribution)    |                                                                                                                     |                                  |
| NA (No 2D figure of T-distribution)        | NA (No 2D figure of T-distribution) | NA (No 2D figure of T-distribution) | NA (No 2D figure of T-distribution) | NA (No 2D figure of T-distribution)     | NA (No 2D figure of T-distribution) | NA (No 2D figure of T-distribution) | NA (No 2D figure of T-distribution) | NA (No 2D figure of T-distribution) | NA (No 2D figure of T-distribution) | ΔT = 21 °C                                   | (V <sub>p</sub> = 1000 V, Ø = 1·10 <sup>-3</sup> m, d = 10·10 <sup>-3</sup> m, t <sub>p</sub> = 300·10 <sup>-6</sup> s) | NA (No 2D figure of T-distribution) | NA (No 2D figure of T-distribution) | NA (No 2D figure of T-distribution) | NA                                                                                                                  | NA                               |
| NA (No 2D figure of T-distribution)        | NA (No 2D figure of T-distribution) | NA (No 2D figure of T-distribution) | NA (No 2D figure of T-distribution) | NA (No 2D figure of T-distribution)     | NA (No 2D figure of T-distribution) | NA (No 2D figure of T-distribution) | NA (No 2D figure of T-distribution) | NA (No 2D figure of T-distribution) | NA (No 2D figure of T-distribution) | ΔT = 20 °C                                   | (V <sub>p</sub> = 1000 V, Ø = 1·10 <sup>-3</sup> m, d = 15·10 <sup>-3</sup> m, t <sub>p</sub> = 300·10 <sup>-6</sup> s) | NA (No 2D figure of T-distribution) | NA (No 2D figure of T-distribution) | NA (No 2D figure of T-distribution) | NA                                                                                                                  | NA                               |
| NA (No 2D figure of T-distribution)        | NA (No 2D figure of T-distribution) | NA (No 2D figure of T-distribution) | NA (No 2D figure of T-distribution) | NA (No 2D figure of T-distribution)     | NA (No 2D figure of T-distribution) | NA (No 2D figure of T-distribution) | NA (No 2D figure of T-distribution) | NA (No 2D figure of T-distribution) | NA (No 2D figure of T-distribution) | ΔT = 135 °C                                  | (V <sub>p</sub> = 2000 V, Ø = 1·10 <sup>-3</sup> m, d = 5·10 <sup>-3</sup> m, t <sub>p</sub> = 300·10 <sup>-6</sup> s)  | NA (No 2D figure of T-distribution) | NA (No 2D figure of T-distribution) | NA (No 2D figure of T-distribution) | NA                                                                                                                  | NA                               |
| NA (No 2D figure of T-distribution)        | NA (No 2D figure of T-distribution) | NA (No 2D figure of T-distribution) | NA (No 2D figure of T-distribution) | NA (No 2D figure of T-distribution)     | NA (No 2D figure of T-distribution) | NA (No 2D figure of T-distribution) | NA (No 2D figure of T-distribution) | NA (No 2D figure of T-distribution) | NA (No 2D figure of T-distribution) | ΔT = 85 °C                                   | (V <sub>p</sub> = 2000 V, Ø = 1·10 <sup>-3</sup> m, d = 10·10 <sup>-3</sup> m, t <sub>p</sub> = 300·10 <sup>-6</sup> s) | NA (No 2D figure of T-distribution) | NA (No 2D figure of T-distribution) | NA (No 2D figure of T-distribution) | NA                                                                                                                  | NA                               |
| NA (No 2D figure of T-distribution)        | NA (No 2D figure of T-distribution) | NA (No 2D figure of T-distribution) | NA (No 2D figure of T-distribution) | NA (No 2D figure of T-distribution)     | NA (No 2D figure of T-distribution) | NA (No 2D figure of T-distribution) | NA (No 2D figure of T-distribution) | NA (No 2D figure of T-distribution) | NA (No 2D figure of T-distribution) | ΔT = 10 °C                                   | (V <sub>p</sub> = 2000 V, Ø = 1·10 <sup>-3</sup> m, d = 15·10 <sup>-3</sup> m, t <sub>p</sub> = 300·10 <sup>-6</sup> s) | NA (No 2D figure of T-distribution) | NA (No 2D figure of T-distribution) | NA (No 2D figure of T-distribution) | NA                                                                                                                  | NA                               |

| Simulations of electric-field distribution |                                     |                                     |                                     | Simulations of temperature distribution |                                     |                                     |                                     |                                     |                                     |                                              |                                                                                                                                                                                                            |                                     |                                     |                                     |                                                                                                                     |                                                                |      |
|--------------------------------------------|-------------------------------------|-------------------------------------|-------------------------------------|-----------------------------------------|-------------------------------------|-------------------------------------|-------------------------------------|-------------------------------------|-------------------------------------|----------------------------------------------|------------------------------------------------------------------------------------------------------------------------------------------------------------------------------------------------------------|-------------------------------------|-------------------------------------|-------------------------------------|---------------------------------------------------------------------------------------------------------------------|----------------------------------------------------------------|------|
| S <sub>E-IRE(th)</sub>                     |                                     |                                     |                                     | S <sub>3ΔT13</sub>                      |                                     |                                     | S <sub>ΔT13</sub>                   |                                     |                                     | T <sub>init</sub> and T <sub>max</sub> range | Additional Details                                                                                                                                                                                         | Parameters for meta-analysis        |                                     |                                     | Validation                                                                                                          |                                                                | Ref  |
| Average E <sub>IRE(th)</sub>               | Size                                | Position                            | Number                              | Size                                    | Position                            | Number                              | S <sub>ΔT13</sub>                   | Position                            | Number                              |                                              |                                                                                                                                                                                                            | S <sub>E-IRE(th),Σ</sub>            | R <sub>3ΔT13</sub>                  | R <sub>ΔT13</sub>                   | Experimental Pulse Parameters (V <sub>p</sub> , t <sub>p</sub> , N <sub>p</sub> , τ <sub>p</sub> , f <sub>p</sub> ) | Parameters attempted to validate                               |      |
| [V·m <sup>-1</sup> ]                       | [m <sup>2</sup> ]                   |                                     |                                     | [m <sup>2</sup> ]                       |                                     |                                     | [m <sup>2</sup> ]                   |                                     |                                     | [°C]                                         |                                                                                                                                                                                                            | [m <sup>2</sup> ]                   | [%]                                 | [%]                                 | ([V], [s], [-], [s], [Hz])                                                                                          |                                                                |      |
|                                            |                                     |                                     |                                     |                                         |                                     |                                     |                                     |                                     |                                     |                                              | 300·10 <sup>-6</sup> s)                                                                                                                                                                                    |                                     |                                     |                                     |                                                                                                                     |                                                                |      |
| NA                                         | NTA                                 | NTA                                 | NTA                                 | NTA                                     | NTA                                 | NTA                                 | NTA                                 | NTA                                 | NTA                                 | NTA                                          | NA                                                                                                                                                                                                         | NTA                                 | NTA                                 | NTA                                 | {1250, 1800, 2100, 2625}, {70·10 <sup>-6</sup> , 100·10 <sup>-6</sup> }, {90, 100}, NA, {1, CAR})                   | {E <sub>IRE(th)</sub> , σ <sub>init</sub> , σ <sub>max</sub> } | [56] |
| NTA                                        | NTA                                 | NTA                                 | NTA                                 | NTA                                     | NTA                                 | NTA                                 | NTA                                 | NTA                                 | NTA                                 | NTA                                          | NA                                                                                                                                                                                                         | NTA                                 | NTA                                 | NTA                                 | {0:200:800, 1600}, 50·10 <sup>-6</sup> , {0:10:100}, 1)                                                             | E <sub>IRE(th)</sub>                                           | [57] |
| NA (No 2d temperature distribution)        | NA (No 2d temperature distribution) | NA (No 2d temperature distribution) | NA (No 2d temperature distribution) | NA (No 2d temperature distribution)     | NA (No 2d temperature distribution) | NA (No 2d temperature distribution) | NA (No 2d temperature distribution) | NA (No 2d temperature distribution) | NA (No 2d temperature distribution) | NA (No 2d temperature distribution)          | NA                                                                                                                                                                                                         | NA (No 2d temperature distribution) | NA (No 2d temperature distribution) | NA (No 2d temperature distribution) | NA                                                                                                                  | No                                                             | [58] |
| NA (No 2D figure of T-distribution)        | NA (No 2D figure of T-distribution) | NA (No 2D figure of T-distribution) | NA (No 2D figure of T-distribution) | NA (No 2D figure of T-distribution)     | NA (No 2D figure of T-distribution) | NA (No 2D figure of T-distribution) | NA (No 2D figure of T-distribution) | NA (No 2D figure of T-distribution) | NA (No 2D figure of T-distribution) | [37, 46.49]                                  | (Homogeneous model)                                                                                                                                                                                        | NA (No 2D figure of T-distribution) | NA (No 2D figure of T-distribution) | NA (No 2D figure of T-distribution) | (200, 70·10 <sup>-6</sup> , 50, NA, 4)                                                                              | NA                                                             | [59] |
| NA (No 2D figure of T-distribution)        | NA (No 2D figure of T-distribution) | NA (No 2D figure of T-distribution) | NA (No 2D figure of T-distribution) | NA (No 2D figure of T-distribution)     | NA (No 2D figure of T-distribution) | NA (No 2D figure of T-distribution) | NA (No 2D figure of T-distribution) | NA (No 2D figure of T-distribution) | NA (No 2D figure of T-distribution) | [37, 42.66]                                  | (Heterogeneous model; σ; Submucosa: σ <sub>init</sub> = 0.1 S·m <sup>-1</sup> ; Mucosa (No villi): σ <sub>init</sub> = 0.8 S·m <sup>-1</sup> ; Mucosa (Villi): σ <sub>init</sub> = 0.8 S·m <sup>-1</sup> ) | NA (No 2D figure of T-distribution) | NA (No 2D figure of T-distribution) | NA (No 2D figure of T-distribution) | (200, 70·10 <sup>-6</sup> , 50, NA, 4)                                                                              | NA                                                             | [59] |
| NA                                         | NA                                  | NA                                  | NA                                  | NA                                      | NA                                  | NA                                  | NA                                  | NA                                  | NA                                  | [20, 39.5]                                   |                                                                                                                                                                                                            | NA                                  | NA                                  | NA                                  | {0:100:800}, {50·10 <sup>-6</sup> , 100·10 <sup>-6</sup> , 200·10 <sup>-6</sup> },                                  | T                                                              | [60] |

| Simulations of electric-field distribution   |                                              |                                              |                                              | Simulations of temperature distribution      |                                              |                                              |                                              |                                              |                                              |                                              |                                                           |                                              |                                              |                                              |                                                                                                                     |                                  |       |
|----------------------------------------------|----------------------------------------------|----------------------------------------------|----------------------------------------------|----------------------------------------------|----------------------------------------------|----------------------------------------------|----------------------------------------------|----------------------------------------------|----------------------------------------------|----------------------------------------------|-----------------------------------------------------------|----------------------------------------------|----------------------------------------------|----------------------------------------------|---------------------------------------------------------------------------------------------------------------------|----------------------------------|-------|
| S <sub>E-IRE(th)</sub>                       |                                              |                                              |                                              | S <sub>3ΔT13</sub>                           |                                              |                                              | S <sub>ΔT13</sub>                            |                                              |                                              |                                              |                                                           | Parameters for meta-analysis                 |                                              |                                              | Validation                                                                                                          |                                  |       |
| Average E <sub>IRE(th)</sub>                 | Size                                         | Position                                     | Number                                       | Size                                         | Position                                     | Number                                       | S <sub>ΔT13</sub>                            | Position                                     | Number                                       | T <sub>init</sub> and T <sub>max</sub> range | Additional Details                                        | S <sub>E-IRE(th),Σ</sub>                     | R <sub>3ΔT13</sub>                           | R <sub>ΔT13</sub>                            | Experimental Pulse Parameters (V <sub>p</sub> , t <sub>p</sub> , N <sub>p</sub> , τ <sub>p</sub> , f <sub>p</sub> ) | Parameters attempted to validate | Ref   |
| [V·m <sup>-1</sup> ]                         | [m <sup>2</sup> ]                            |                                              |                                              | [m <sup>2</sup> ]                            |                                              |                                              | [m <sup>2</sup> ]                            |                                              |                                              | [°C]                                         |                                                           | [m <sup>2</sup> ]                            | [%]                                          | [%]                                          | ([V], [s], [-], [s], [Hz])                                                                                          |                                  |       |
|                                              |                                              |                                              |                                              |                                              |                                              |                                              |                                              |                                              |                                              |                                              |                                                           |                                              |                                              |                                              | {8, [30:20:90]}, NA, 1)                                                                                             |                                  |       |
| NA (No 2D figures of E- and T-distributions) | NA (No 2D figures of E- and T-distributions) | NA (No 2D figures of E- and T-distributions) | NA (No 2D figures of E- and T-distributions) | NA (No 2D figures of E- and T-distributions) | NA (No 2D figures of E- and T-distributions) | NA (No 2D figures of E- and T-distributions) | NA (No 2D figures of E- and T-distributions) | NA (No 2D figures of E- and T-distributions) | NA (No 2D figures of E- and T-distributions) | NR                                           | NA                                                        | NA (No 2D figures of E- and T-distributions) | NA (No 2D figures of E- and T-distributions) | NA (No 2D figures of E- and T-distributions) | (450, 100·10 <sup>-6</sup> , 50, NA, 1)                                                                             | E <sub>IRE(th)</sub>             | [6 1] |
| NA (No 2D figures of E- and T-distributions) | NA (No 2D figures of E- and T-distributions) | NA (No 2D figures of E- and T-distributions) | NA (No 2D figures of E- and T-distributions) | NA (No 2D figures of E- and T-distributions) | NA (No 2D figures of E- and T-distributions) | NA (No 2D figures of E- and T-distributions) | NA (No 2D figures of E- and T-distributions) | NA (No 2D figures of E- and T-distributions) | NA (No 2D figures of E- and T-distributions) | [37, 100]                                    | (Parameters used NC)                                      | NA (No 2D figures of E- and T-distributions) | NA (No 2D figures of E- and T-distributions) | NA (No 2D figures of E- and T-distributions) | ([1540, 3000], 90·10 <sup>-6</sup> , {20, 70} NR, NR)                                                               | NA                               | [6 2] |
| NTA                                          | NA                                                        | NTA                                          | NTA                                          | NTA                                          | ({1250, 1750, 2250}, 100·10 <sup>-6</sup> , 100, NA, 1)                                                             | {σ, E <sub>IRE(th)</sub> }       | [6 3] |
| NA (1D simulation)                           | [37, 92]                                     | (V <sub>p</sub> = 1500V, model excluding blood perfusion) | NA (1D simulation)                           | NA (1D simulation)                           | NA (1D simulation)                           | NA                                                                                                                  | NA                               | [6 4] |
| NA (1D simulation)                           | [37, 53]                                     | (V <sub>p</sub> = 2000V, model including blood perfusion) | NA (1D simulation)                           | NA (1D simulation)                           | NA (1D simulation)                           | NA                                                                                                                  | NA                               | [6 4] |
| NTA                                          | NA                                                        | NTA                                          | NTA                                          | NTA                                          | ({2000, 2250, 2400, 2500, 2700}, {70·10 <sup>-6</sup> , 100·10 <sup>-6</sup> }, {70, 90}, NR, NR)                   | E <sub>IRE(th)</sub>             | [6 5] |
| 700·10 <sup>2</sup>                          | 5.078·10 <sup>-5</sup>                       | Surrounding                                  | 1                                            | 0                                            | 0                                            | 0                                            | 0                                            | 0                                            | 0                                            | [37, 38.9]                                   | NA                                                        | 6.635·10 <sup>-5</sup>                       | 0                                            | 0                                            | (600, 50·10 <sup>-6</sup> , {10, 45,                                                                                | NA                               | [6 6] |

| Simulations of electric-field distribution   |                                              |                                                                            |                                              | Simulations of temperature distribution      |                                              |                                              |                                              |                                              |                                              |                                              |                       | Parameters for meta-analysis                 |                                              |                                              | Validation                                                                                                                |                                  |      |
|----------------------------------------------|----------------------------------------------|----------------------------------------------------------------------------|----------------------------------------------|----------------------------------------------|----------------------------------------------|----------------------------------------------|----------------------------------------------|----------------------------------------------|----------------------------------------------|----------------------------------------------|-----------------------|----------------------------------------------|----------------------------------------------|----------------------------------------------|---------------------------------------------------------------------------------------------------------------------------|----------------------------------|------|
| S <sub>E-IRE(th)</sub>                       |                                              |                                                                            |                                              | S <sub>3ΔT13</sub>                           |                                              |                                              | S <sub>ΔT13</sub>                            |                                              |                                              |                                              |                       | Parameters for meta-analysis                 |                                              |                                              | Validation                                                                                                                |                                  |      |
| Average E <sub>IRE(th)</sub>                 | Size                                         | Position                                                                   | Number                                       | Size                                         | Position                                     | Number                                       | S <sub>ΔT13</sub>                            | Position                                     | Number                                       | T <sub>init</sub> and T <sub>max</sub> range | Additional Details    | S <sub>E-IRE(th),Σ</sub>                     | R <sub>3ΔT13</sub>                           | R <sub>ΔT13</sub>                            | Experimental Pulse Parameters (V <sub>p</sub> , t <sub>p</sub> , N <sub>p</sub> , τ <sub>p</sub> , f <sub>p</sub> )       | Parameters attempted to validate | Ref  |
| [V·m <sup>-1</sup> ]                         | [m <sup>2</sup> ]                            |                                                                            |                                              | [m <sup>2</sup> ]                            |                                              |                                              | [m <sup>2</sup> ]                            |                                              |                                              | [°C]                                         |                       | [m <sup>2</sup> ]                            | [%]                                          | [%]                                          | ([V], [s], [-], [s], [Hz])                                                                                                |                                  |      |
|                                              |                                              | needle electrode                                                           |                                              |                                              |                                              |                                              |                                              |                                              |                                              |                                              |                       |                                              |                                              |                                              | 90, 180, 270, 450, 540}, NA, 1)                                                                                           |                                  |      |
| 700·10 <sup>2</sup>                          | 1.557·10 <sup>-5</sup>                       | At the outer edge of the surface electrode , close to the needle electrode | 1                                            | 0                                            | 0                                            | 0                                            | 0                                            | 0                                            | 0                                            | NA                                           | NA                    | 6.635·10 <sup>-5</sup>                       | 0                                            | 0                                            | (600, 50·10 <sup>-6</sup> , {10, 45, 90, 180, 270, 450, 540}, NA, 1)                                                      | NA                               | [66] |
| NTA                                          | NTA                                          | NTA                                                                        | NTA                                          | NTA                                          | NTA                                          | NTA                                          | NTA                                          | NTA                                          | NTA                                          | NTA                                          | NA                    | NTA                                          | NTA                                          | NTA                                          | ([1650,2850], 90·10 <sup>-6</sup> , NR, NR, NR)                                                                           | E <sub>IRE(th)</sub>             | [67] |
| NTA                                          | NTA                                          | NTA                                                                        | NTA                                          | NTA                                          | NTA                                          | NTA                                          | NTA                                          | NTA                                          | NTA                                          | NTA                                          | NA                    | NTA                                          | NTA                                          | NTA                                          | (NR, [70·10 <sup>-6</sup> , 90·10 <sup>-6</sup> ], {10, 80}, NA, NR)<br><br>(Per treatment, a patient received 90 pulses) | E <sub>IRE(th)</sub>             | [68] |
| NTA                                          | NA                                           | NTA                                                                        | NA                                           | NTA                                          | NA                                           | NTA                                          | NA                                           | NTA                                          | NA                                           | NTA                                          | NA                    | NTA                                          | NA                                           | NTA                                          | ([500, 1000], NR, NR, NR, NR)                                                                                             | NC                               | [69] |
| NA (No 2D figures of E- and T-distributions) | NA (No 2D figures of E- and T-distributions) | NA (No 2D figures of E- and T-distributions)                               | NA (No 2D figures of E- and T-distributions) | NA (No 2D figures of E- and T-distributions) | NA (No 2D figures of E- and T-distributions) | NA (No 2D figures of E- and T-distributions) | NA (No 2D figures of E- and T-distributions) | NA (No 2D figures of E- and T-distributions) | NA (No 2D figures of E- and T-distributions) | [37, 45.2]                                   | (N <sub>p</sub> = 90) | NA (No 2D figures of E- and T-distributions) | NA (No 2D figures of E- and T-distributions) | NA (No 2D figures of E- and T-distributions) | NA                                                                                                                        | NA                               | [70] |
| NTA                                          | NTA                                          | NTA                                                                        | NTA                                          | NTA                                          | NTA                                          | NTA                                          | NTA                                          | NTA                                          | NTA                                          | NTA                                          | NA                    | NTA                                          | NTA                                          | NTA                                          | NA                                                                                                                        | NA                               | [71] |
| NTA                                          | NTA                                          | NTA                                                                        | NTA                                          | NTA                                          | NTA                                          | NTA                                          | NTA                                          | NTA                                          | NTA                                          | NTA                                          | NA                    | NTA                                          | NTA                                          | NTA                                          | {150, 350, 500}, 100·10 <sup>-6</sup> , {8, 32, 64}, NA. 1)                                                               | NA                               | [72] |

| Simulations of electric-field distribution    |                                               |                                               |                                               | Simulations of temperature distribution       |                                               |                                               |                                               |                                               |                                               |                                              |                                                                                 |                                               |                                               |                                               |                                                                                                                      |                                   |      |
|-----------------------------------------------|-----------------------------------------------|-----------------------------------------------|-----------------------------------------------|-----------------------------------------------|-----------------------------------------------|-----------------------------------------------|-----------------------------------------------|-----------------------------------------------|-----------------------------------------------|----------------------------------------------|---------------------------------------------------------------------------------|-----------------------------------------------|-----------------------------------------------|-----------------------------------------------|----------------------------------------------------------------------------------------------------------------------|-----------------------------------|------|
| S <sub>E-IRE(th)</sub>                        |                                               |                                               |                                               | S <sub>3ΔT13</sub>                            |                                               |                                               | S <sub>ΔT13</sub>                             |                                               |                                               |                                              |                                                                                 | Parameters for meta-analysis                  |                                               |                                               | Validation                                                                                                           |                                   |      |
| Average E <sub>IRE(th)</sub>                  | Size                                          | Position                                      | Number                                        | Size                                          | Position                                      | Number                                        | S <sub>ΔT13</sub>                             | Position                                      | Number                                        | T <sub>init</sub> and T <sub>max</sub> range | Additional Details                                                              | S <sub>E-IRE(th),Σ</sub>                      | R <sub>3ΔT13</sub>                            | R <sub>ΔT13</sub>                             | Experiment al Pulse Parameters (V <sub>P</sub> , t <sub>p</sub> , N <sub>P</sub> , τ <sub>P</sub> , f <sub>P</sub> ) | Paramet ers attempted to validate | Re f |
| [V·m <sup>-1</sup> ]                          | [m <sup>2</sup> ]                             |                                               |                                               | [m <sup>2</sup> ]                             |                                               |                                               | [m <sup>2</sup> ]                             |                                               |                                               | [°C]                                         |                                                                                 | [m <sup>2</sup> ]                             | [%]                                           | [%]                                           | ([V], [s], [-], [s], [Hz])                                                                                           |                                   |      |
| 745·10 <sup>2</sup>                           | 5.532·10 <sup>-4</sup>                        | Center                                        | 1                                             | 5.821·10 <sup>-4</sup>                        | Center                                        | 1                                             | 1.2305·10 <sup>-4</sup>                       | {Left, Right}                                 | 2                                             | [37, 67]                                     | (Cylinder, Ø = 1·10 <sup>-3</sup> m, V <sub>P</sub> = 3000 V)                   | 5.532·10 <sup>-4</sup>                        | 105.2                                         | 44.5                                          | (450, 100·10 <sup>-6</sup> , 80, NA, 1)                                                                              | E <sub>IRE(th)</sub>              | [73] |
| NTA                                           | NTA                                          | NA                                                                              | NTA                                           | NTA                                           | NTA                                           | (({1000, 1250, 1500}, 100·10 <sup>-6</sup> , 90, NA, 1)                                                              | E <sub>IRE(th)</sub>              | [74] |
| NTA                                           | NTA                                          | NA                                                                              | NTA                                           | NTA                                           | NTA                                           | (({50, 100}, 100·10 <sup>-6</sup> , 90, 1, NA)                                                                       | E <sub>IRE(th)</sub>              | [75] |
| NA (No 2D figures of E- and T-distribut ions) | NA (No 2D figures of E- and T-distributi ons) | NA (No 2D figures of E- and T-distributi ons) | NA (No 2D figures of E- and T-distributi ons) | NA (No 2D figures of E- and T-distributi ons) | NA (No 2D figures of E- and T-distributi ons) | NA (No 2D figures of E- and T-distributi ons) | NA (No 2D figures of E- and T-distributi ons) | NA (No 2D figures of E- and T-distributi ons) | NA (No 2D figures of E- and T-distributi ons) | NR                                           | NA                                                                              | NA (No 2D figures of E- and T-distributi ons) | NA (No 2D figures of E- and T-distributi ons) | NA (No 2D figures of E- and T-distributi ons) | (({0, 75, 90, 100, 115, 150, 200, 300, 400}, 100·10 <sup>-6</sup> , 100, NA, 1)                                      | E <sub>IRE(th)</sub>              | [76] |
| NTA                                           | NTA                                          | NA                                                                              | NTA                                           | NTA                                           | NTA                                           | (100·10 <sup>-6</sup> , 70, 1)                                                                                       | NA                                | [77] |
| NTA                                           | NTA                                          | NA                                                                              | NTA                                           | NTA                                           | NTA                                           | (({200, 400, 600, 800, 1800}, {75·10 <sup>-6</sup> , 100·10 <sup>-6</sup> }, {1, 10, 30, 60}, NA, 1)                 | NA                                | [78] |
| NTA                                           | NTA                                          | NA                                                                              | NTA                                           | NTA                                           | NTA                                           | (3000, 70·10 <sup>-6</sup> , 200, NR, NR)                                                                            | NA                                | [79] |
| 700·10 <sup>2</sup>                           | 4.26·10 <sup>-4</sup>                         | Center                                        | 1                                             | 1.592·10 <sup>-4</sup>                        | Center                                        | 1                                             | 1.43·10 <sup>-4</sup>                         | Center                                        | 1                                             | [26, 65]                                     | (ω <sub>b</sub> = 3.575·10 <sup>-3</sup> s <sup>-1</sup> , Un-cooled electrode) | 4.26·10 <sup>-4</sup>                         | 37.4                                          | 33.57                                         | ([2700, 3000], 100·10 <sup>-6</sup> , {300, 400}, NA, 1.5)                                                           | T                                 | [80] |
| 700·10 <sup>2</sup>                           | 4.06·10 <sup>-4</sup>                         | Center                                        | 1                                             | 5.324·10 <sup>-5</sup>                        | {Left, Right}                                 | 2                                             | 0                                             | NA                                            | NA                                            | [26, 46]                                     | (ω <sub>b</sub> = 3.575·10 <sup>-3</sup> s <sup>-1</sup> , Cooled electrode)    | 4.08·10 <sup>-4</sup>                         | 26.1                                          | 0                                             | ([2700, 3000], 100·10 <sup>-6</sup> , {300, 400}, NA, 1.5)                                                           | T                                 | [80] |

| Simulations of electric-field distribution |                      |          |        | Simulations of temperature distribution |          |        |                  |          |        |                                |                                                               |                              |                   |                  |                                                                            |                                  |      |
|--------------------------------------------|----------------------|----------|--------|-----------------------------------------|----------|--------|------------------|----------|--------|--------------------------------|---------------------------------------------------------------|------------------------------|-------------------|------------------|----------------------------------------------------------------------------|----------------------------------|------|
| $S_{E-IRE(th)}$                            |                      |          |        | $S_{3\Delta T13}$                       |          |        | $S_{\Delta T13}$ |          |        | $T_{init}$ and $T_{max}$ range |                                                               | Parameters for meta-analysis |                   |                  | Validation                                                                 |                                  |      |
| Average $E_{IRE(th)}$                      | Size                 | Position | Number | Size                                    | Position | Number | $S_{\Delta T13}$ | Position | Number |                                | Additional Details                                            | $S_{E-IRE(th),\Sigma}$       | $R_{3\Delta T13}$ | $R_{\Delta T13}$ | Experimental Pulse Parameters ( $V_p$ , $t_p$ , $N_p$ , $\tau_p$ , $f_p$ ) | Parameters attempted to validate | Ref  |
| $[V \cdot m^{-1}]$                         | $[m^2]$              |          |        | $[m^2]$                                 |          |        | $[m^2]$          |          |        | $[^{\circ}C]$                  |                                                               | $[m^2]$                      | $[\%]$            | $[\%]$           | $([V], [s], [-], [s], [Hz])$                                               |                                  |      |
| $700 \cdot 10^2$                           | $2.04 \cdot 10^{-6}$ | Top      | 1      | 0                                       | NA       | NA     | 0                | NA       | NA     | NA                             | ( $\omega_b = 3.575 \cdot 10^{-3} s^{-1}$ , Cooled electrode) | $4.08 \cdot 10^{-4}$         | 26.1              | 0                | ([2700, 3000], $100 \cdot 10^{-6}$ , {300, 400}, NA, 1.5)                  | Temperature increase             | [80] |
